# Supplementary material for: Accurate phenotypic classification and exome sequencing allow identification of novel genes and variants associated with adult-onset hearing loss
Source: bioRxiv or medRxiv preprint supplement (doi:10.1101/2023.04.27.23289040), 2023-04-29
Supplement: Supplementary file [file media-1.pdf]

## Supplementary Figures

A

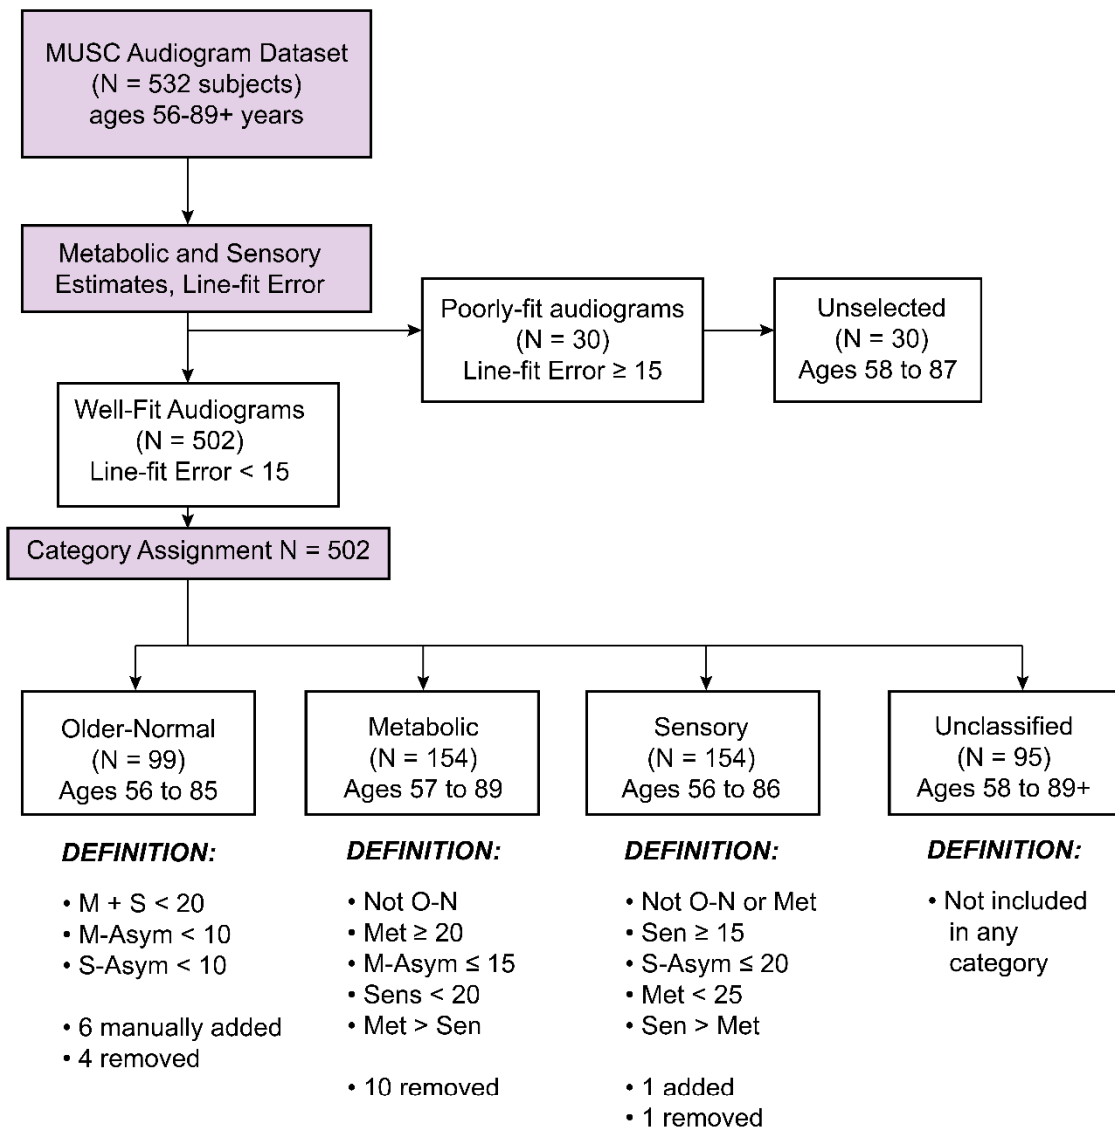

B

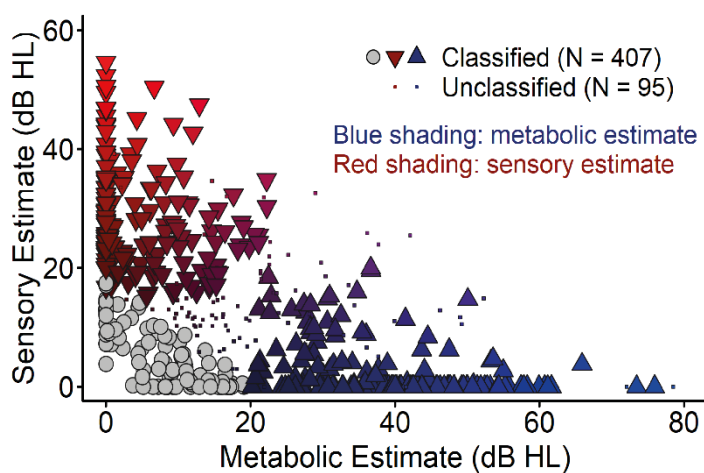

C

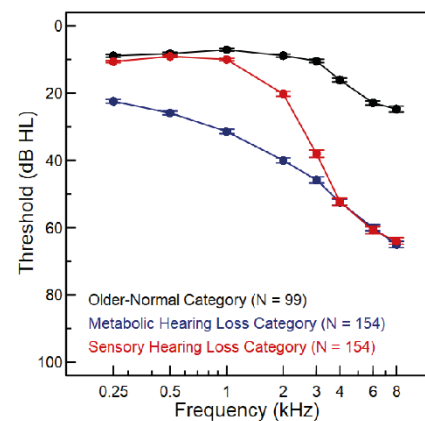

**Suppl. Figure 1.** A, Flow chart showing the audiogram classification procedure for the MUSC cohort. B, plot showing the sensory estimate (how much of the hearing loss observed can be attributed to sensory hearing loss) against the metabolic estimate (how much of the hearing loss observed can be attributed to metabolic hearing loss) for each case, with the blue/red shading indicating the magnitude of each estimate (metabolic/sensory respectively). The small dots are the Unclassified cases; Unselected cases are not shown. The grey circles near the origin are the Older-Normal participants, with very small contributions of both Sensory and Metabolic hearing loss. The red-shaded triangles aligned along the Y axis are those people with purely sensory contributions to their hearing loss, and the blue-shaded triangles along the X axis are those people with purely metabolic contributions to their hearing loss. However, there are a substantial number of people with mixed contributions, and these are the mixed shades in the middle of the graph. C, mean audiograms for the selected cases assigned to each category. Error bars are SEM.

A

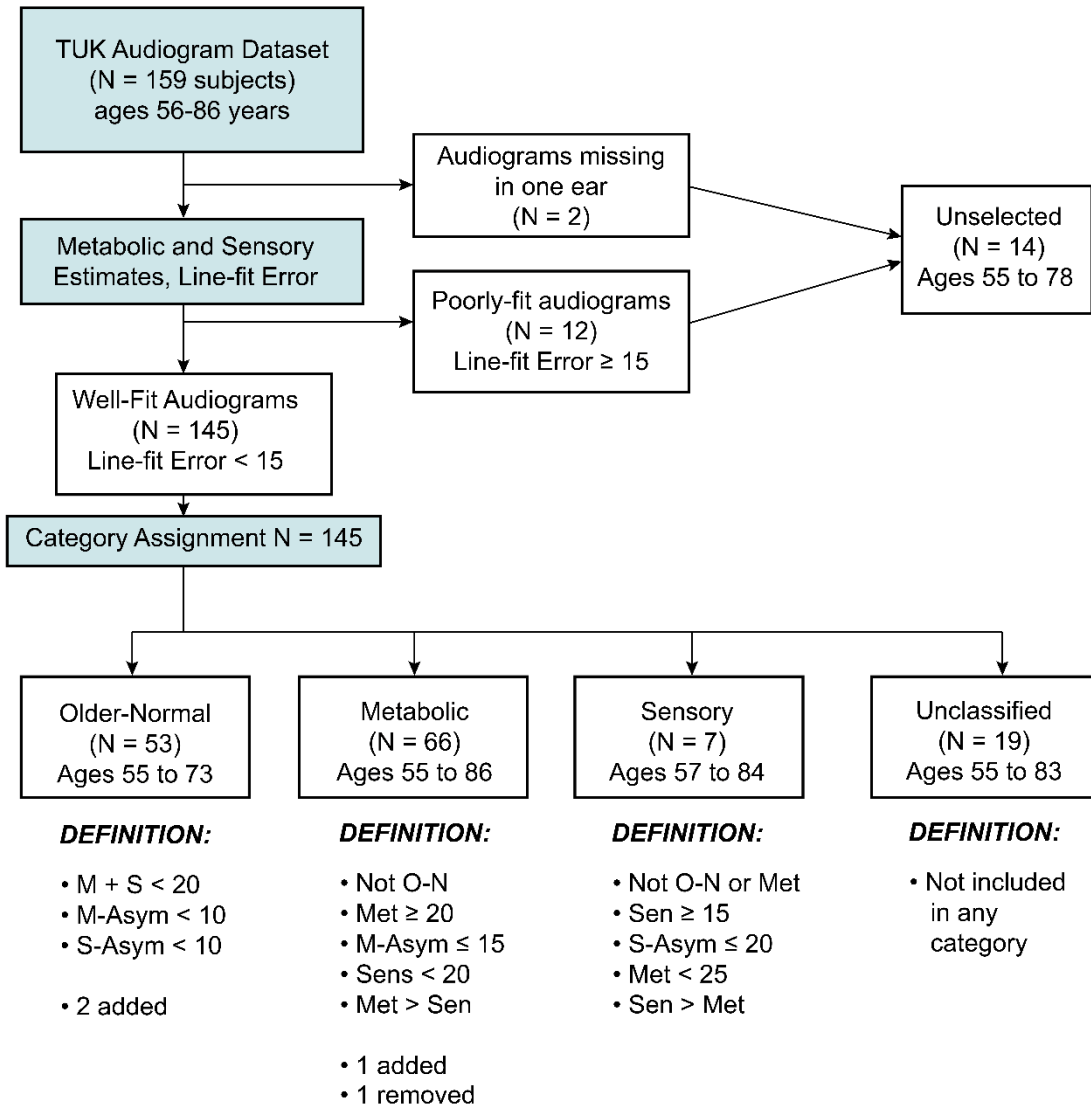

B

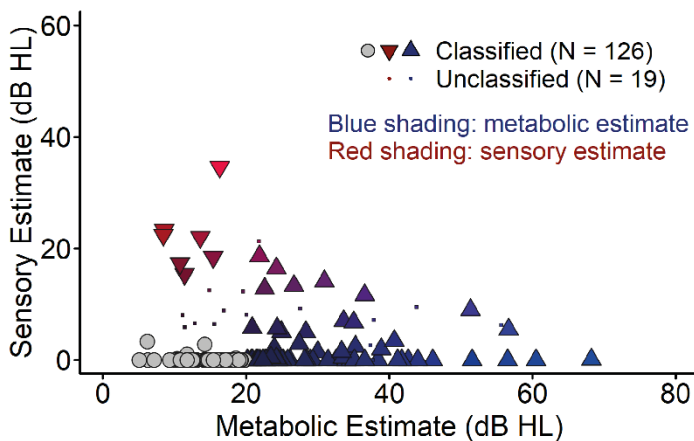

C

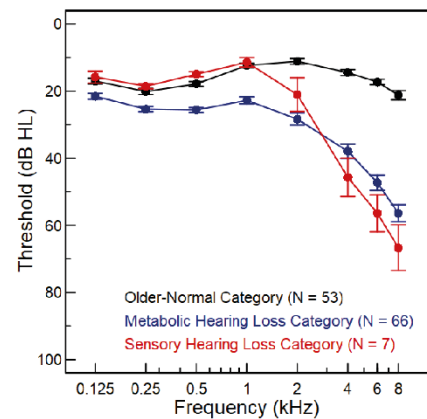

**Suppl. Figure 2.** A, Flow chart showing the audiogram classification procedure for the TwinsUK cohort. B, plot showing the sensory estimate (how much of the hearing loss observed can be attributed to sensory hearing loss) against the metabolic estimate (how much of the hearing loss observed can be attributed to metabolic hearing loss) for each case, with the blue/red shading indicating the magnitude of each estimate (metabolic/sensory respectively). The small dots are the Unclassified cases; Unselected cases are not shown. The grey circles near the origin are the Older-Normal participants, with very small contributions of both Sensory and Metabolic hearing loss. The blue-shaded triangles along the X axis are those people with purely metabolic contributions to their hearing loss. There are no participants with a purely sensory contribution to their hearing loss, but there are a few with a Sensory classification, shown by redder shading and their high y coordinate. Most people with mixed contributions have a comparatively small Sensory component, and are classified as Metabolic (the blue-purple triangles on the right of the plot). C, mean audiograms for the selected cases assigned to each category. Error bars are SEM.



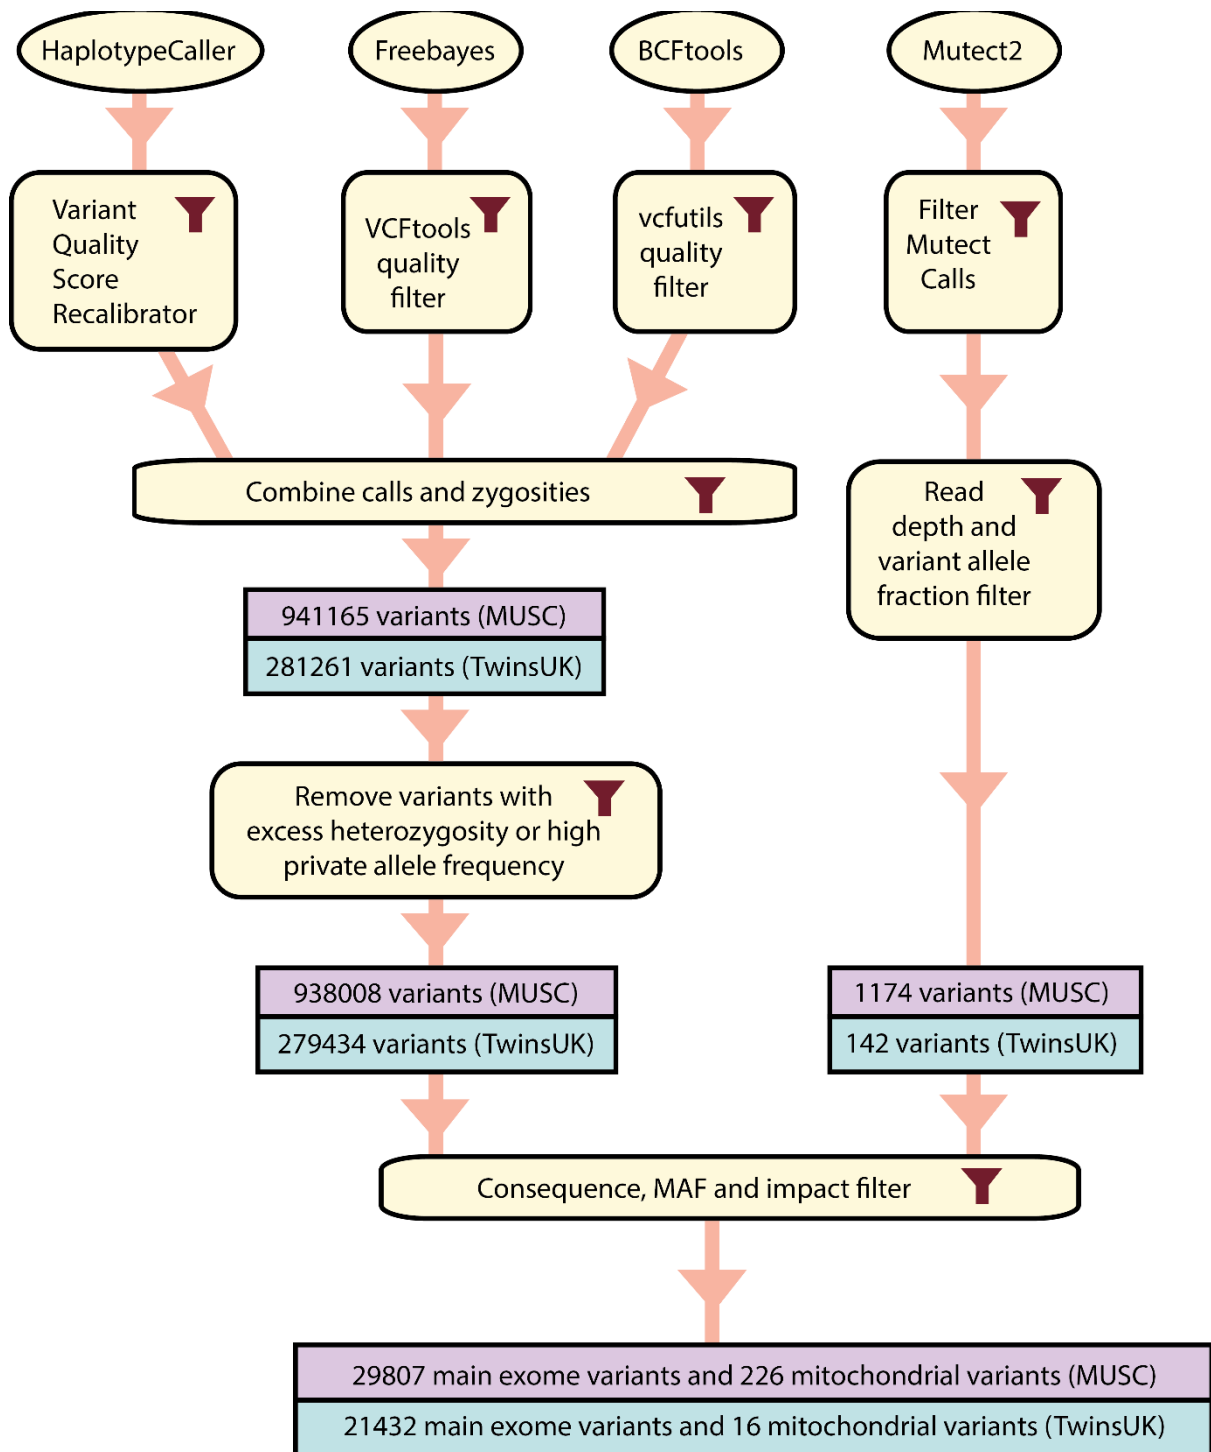

**Suppl. Figure 3.** Flow chart showing the variant filtering pipeline. See Suppl. Table 2 for details of the filter settings.

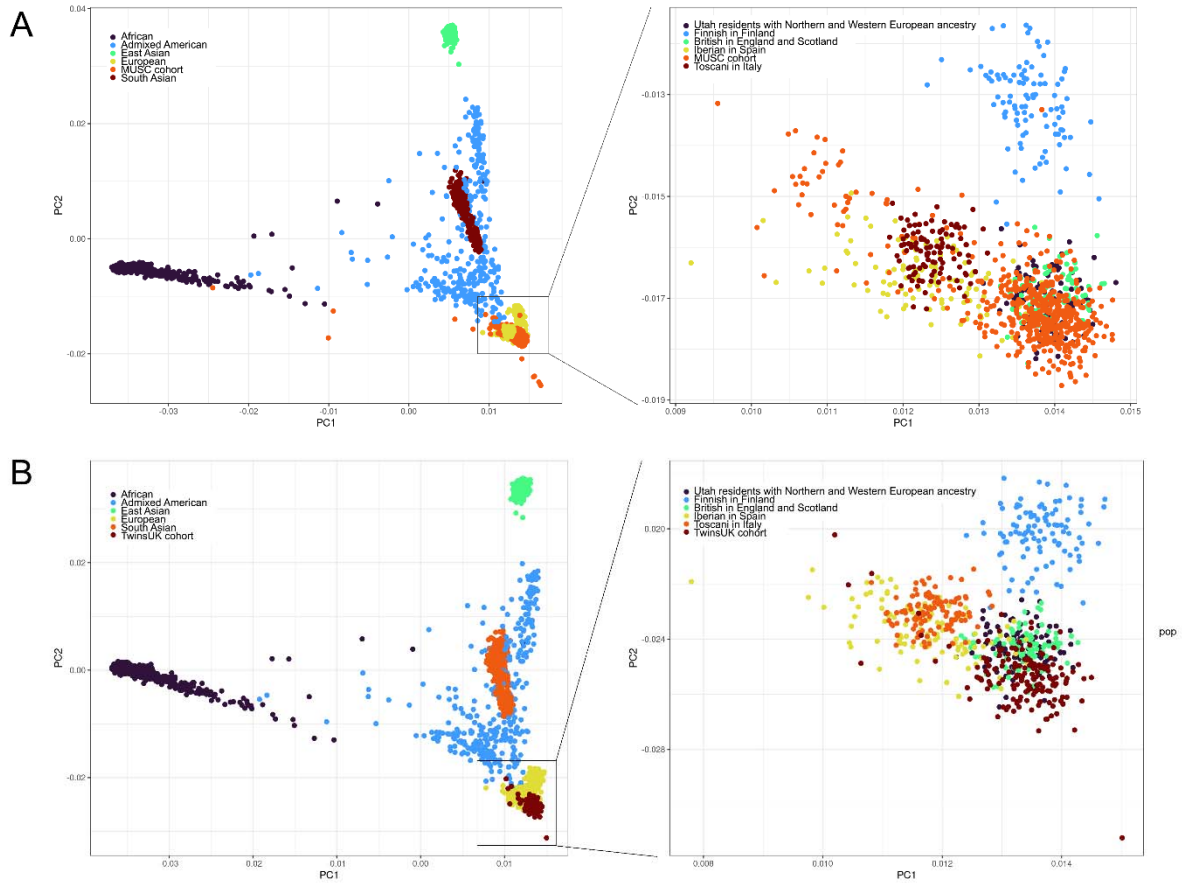

**Suppl. Figure 4.** Principal Component Analysis plots showing the genetic ancestry of the two cohorts used in this study compared to 2504 individuals from the 1000 Genomes study (Genomes Project et al. 2015). A shows the MUSC cohort, and B the TwinsUK cohort. On the left-hand plot, 1000 Genomes samples are coloured by their superpopulation, while the right-hand plot is a close-up showing just the European subpopulations.

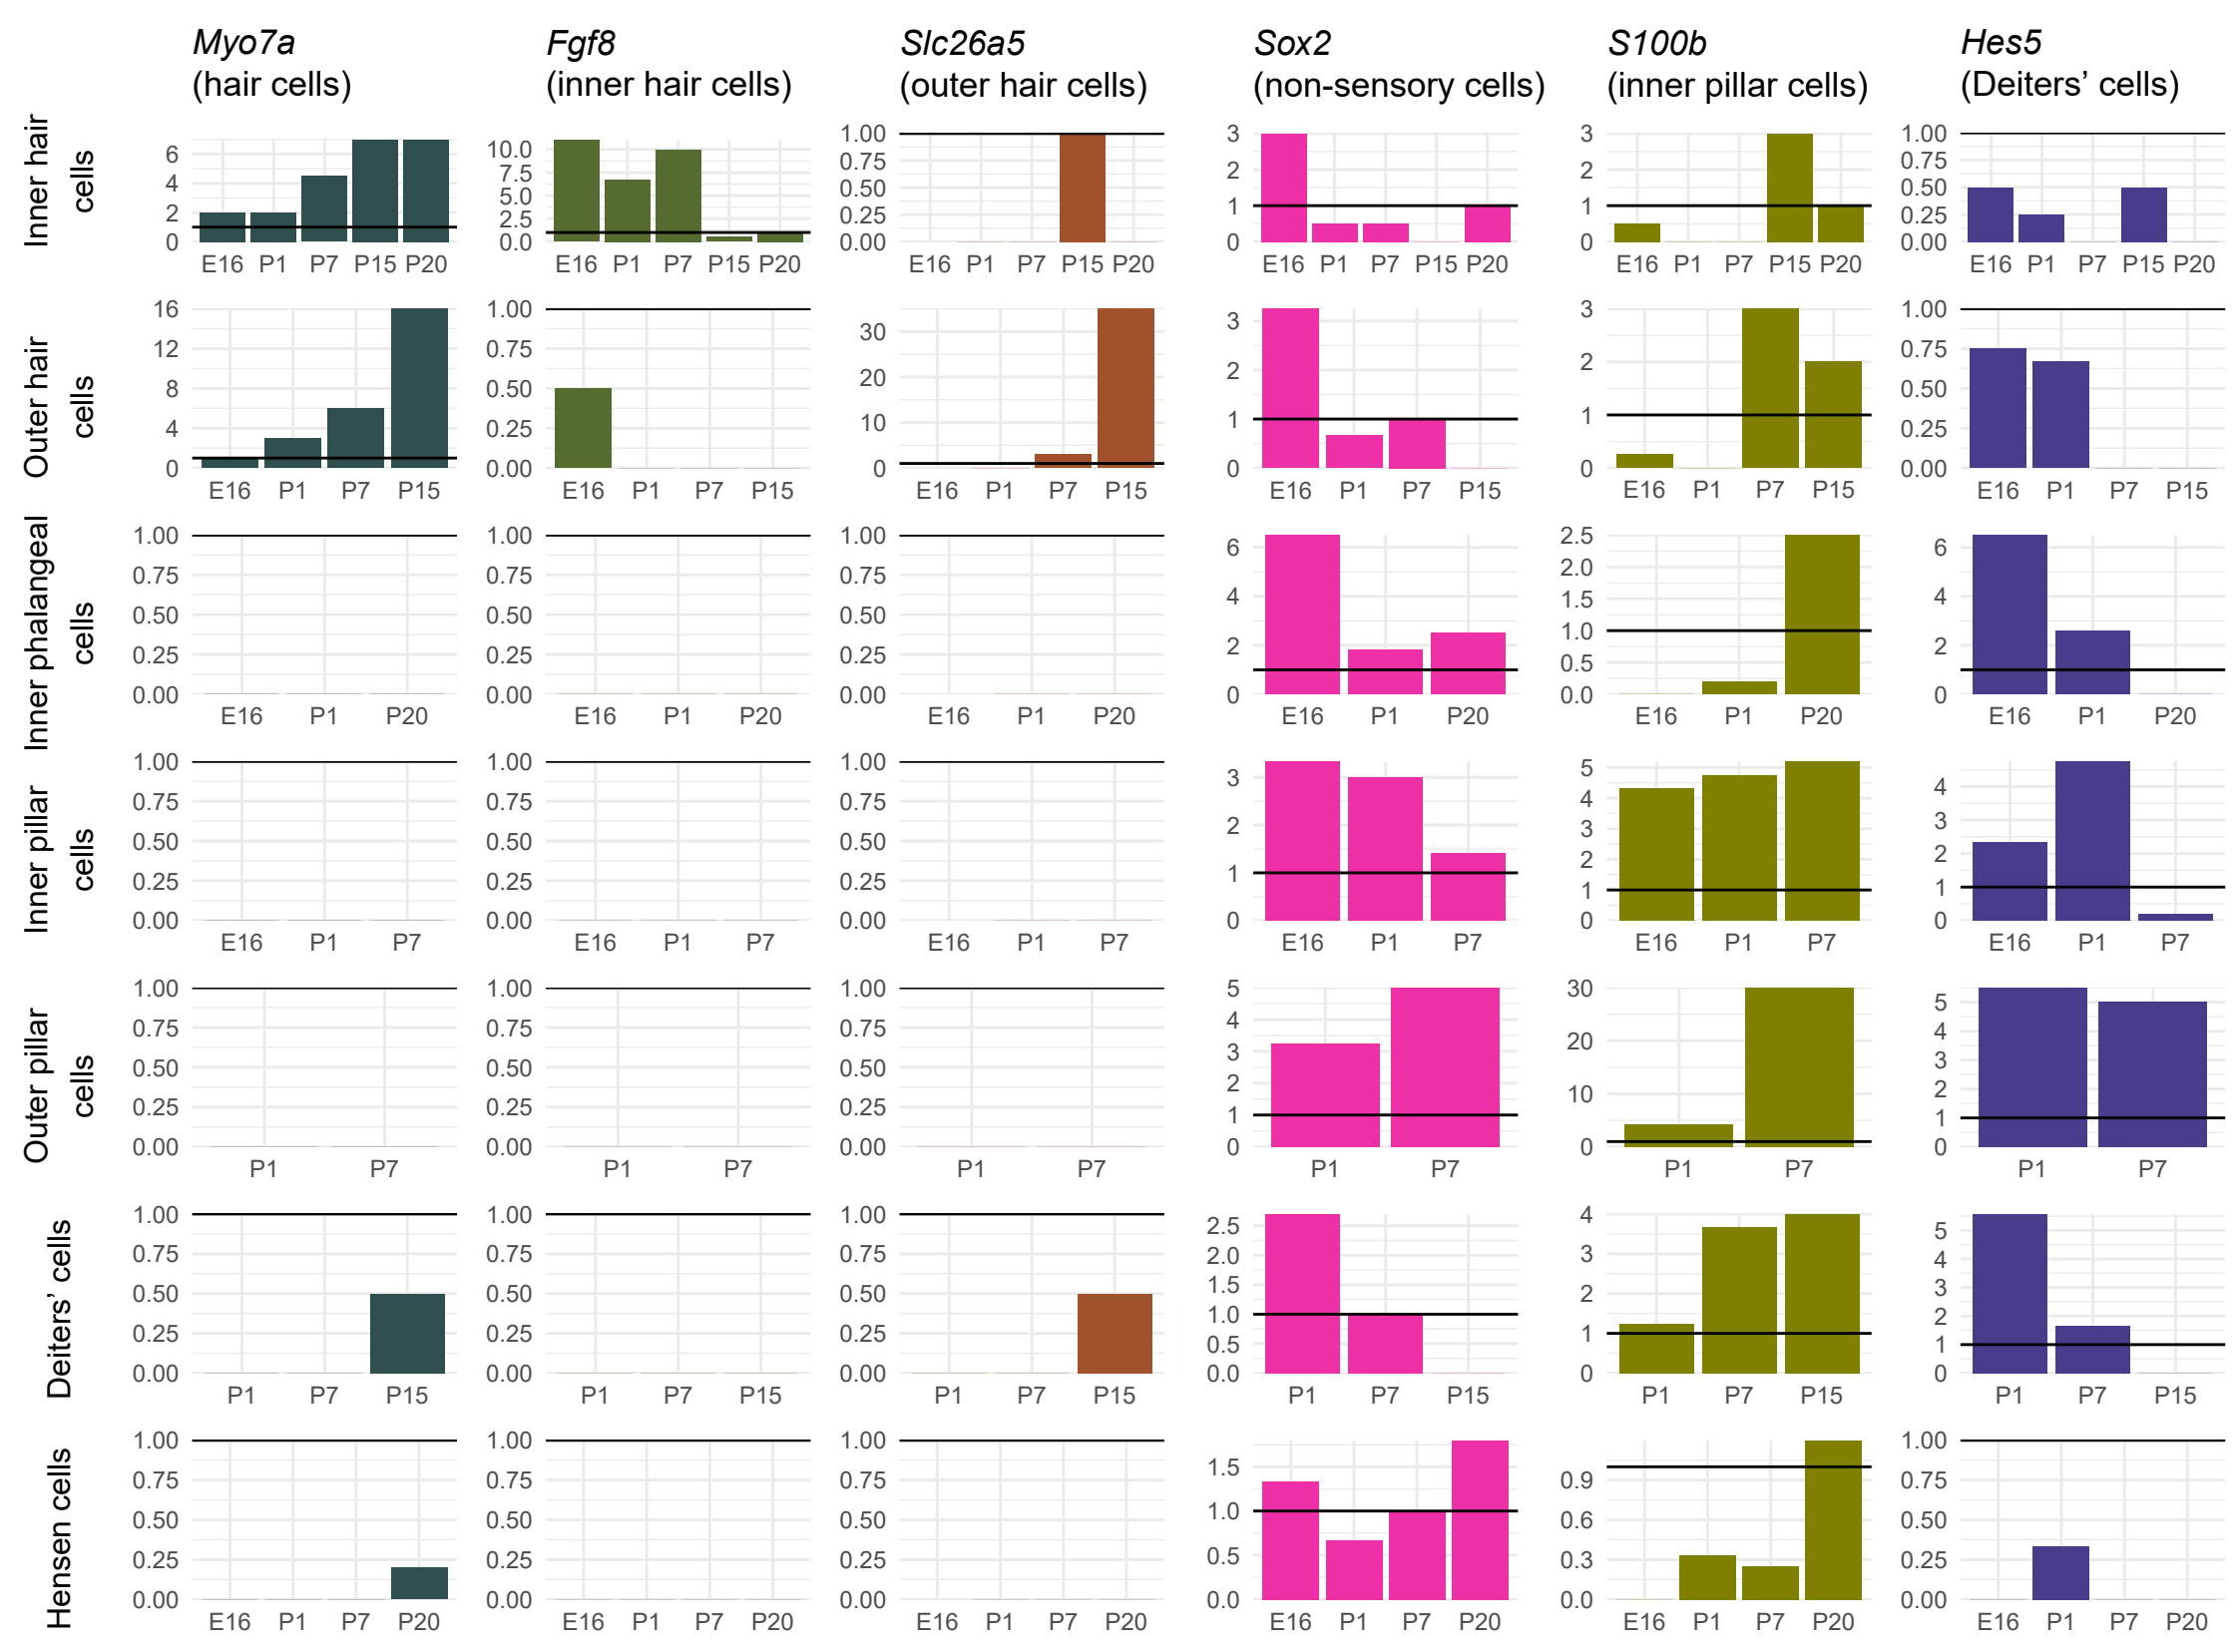

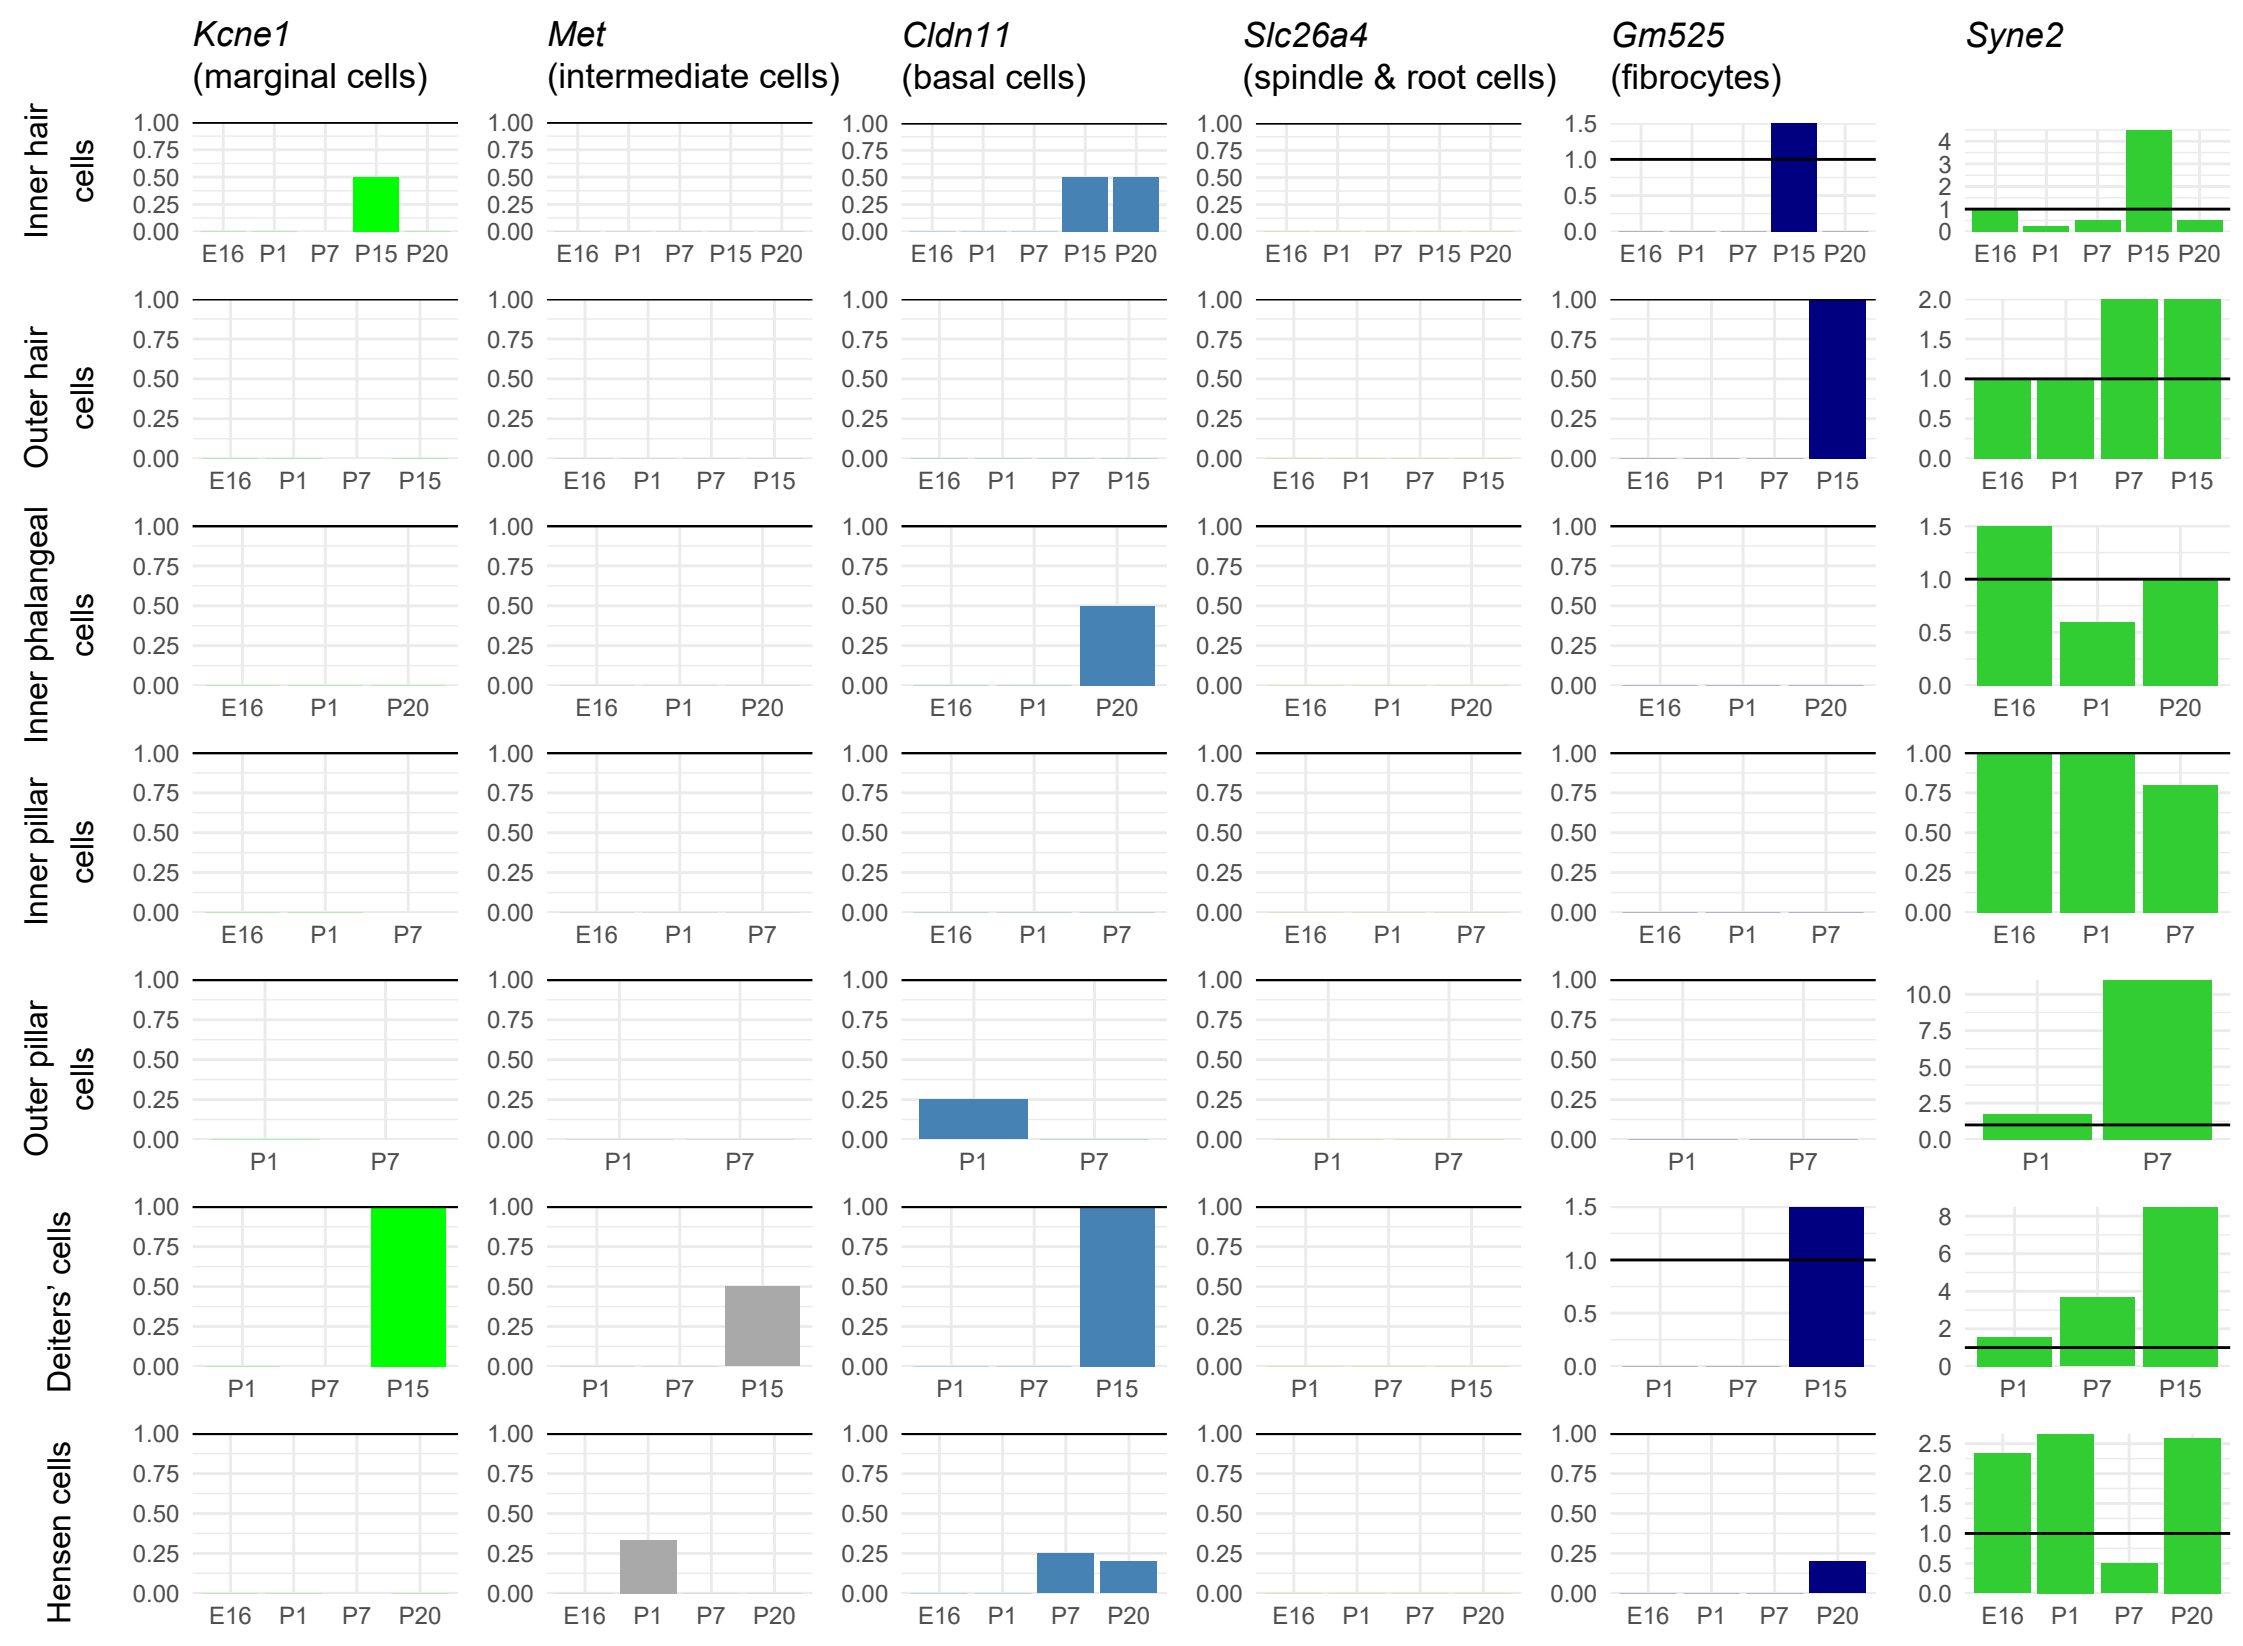

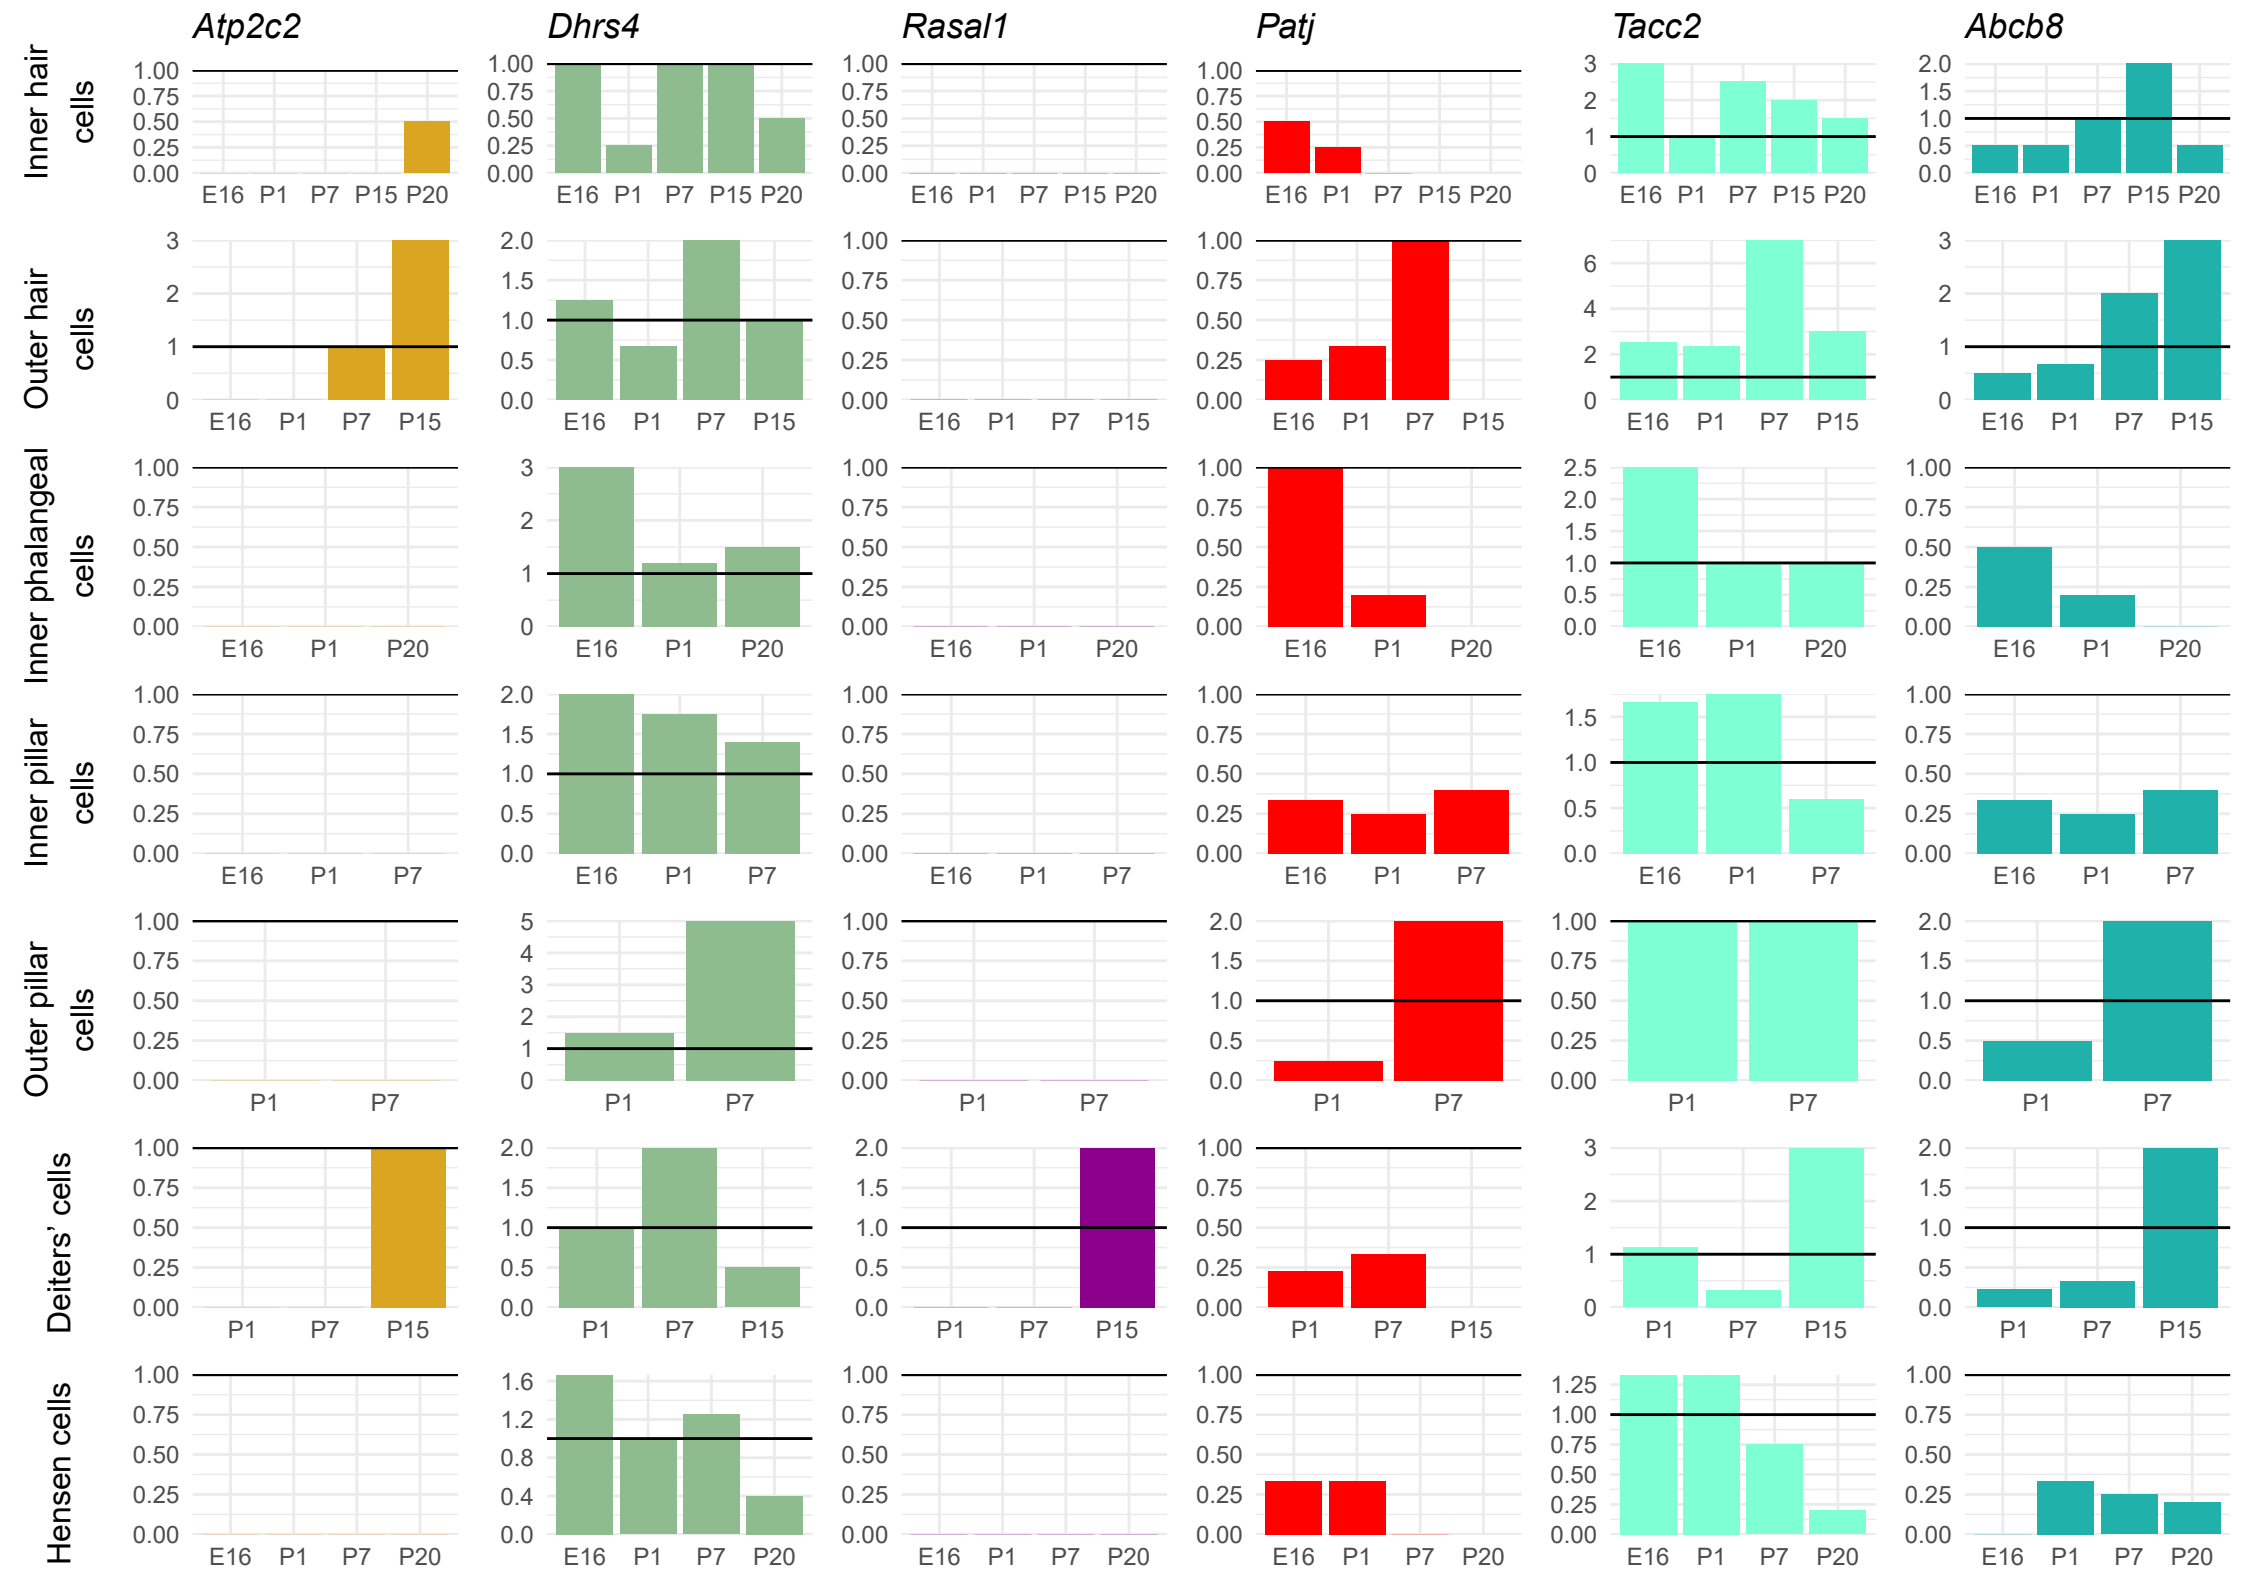

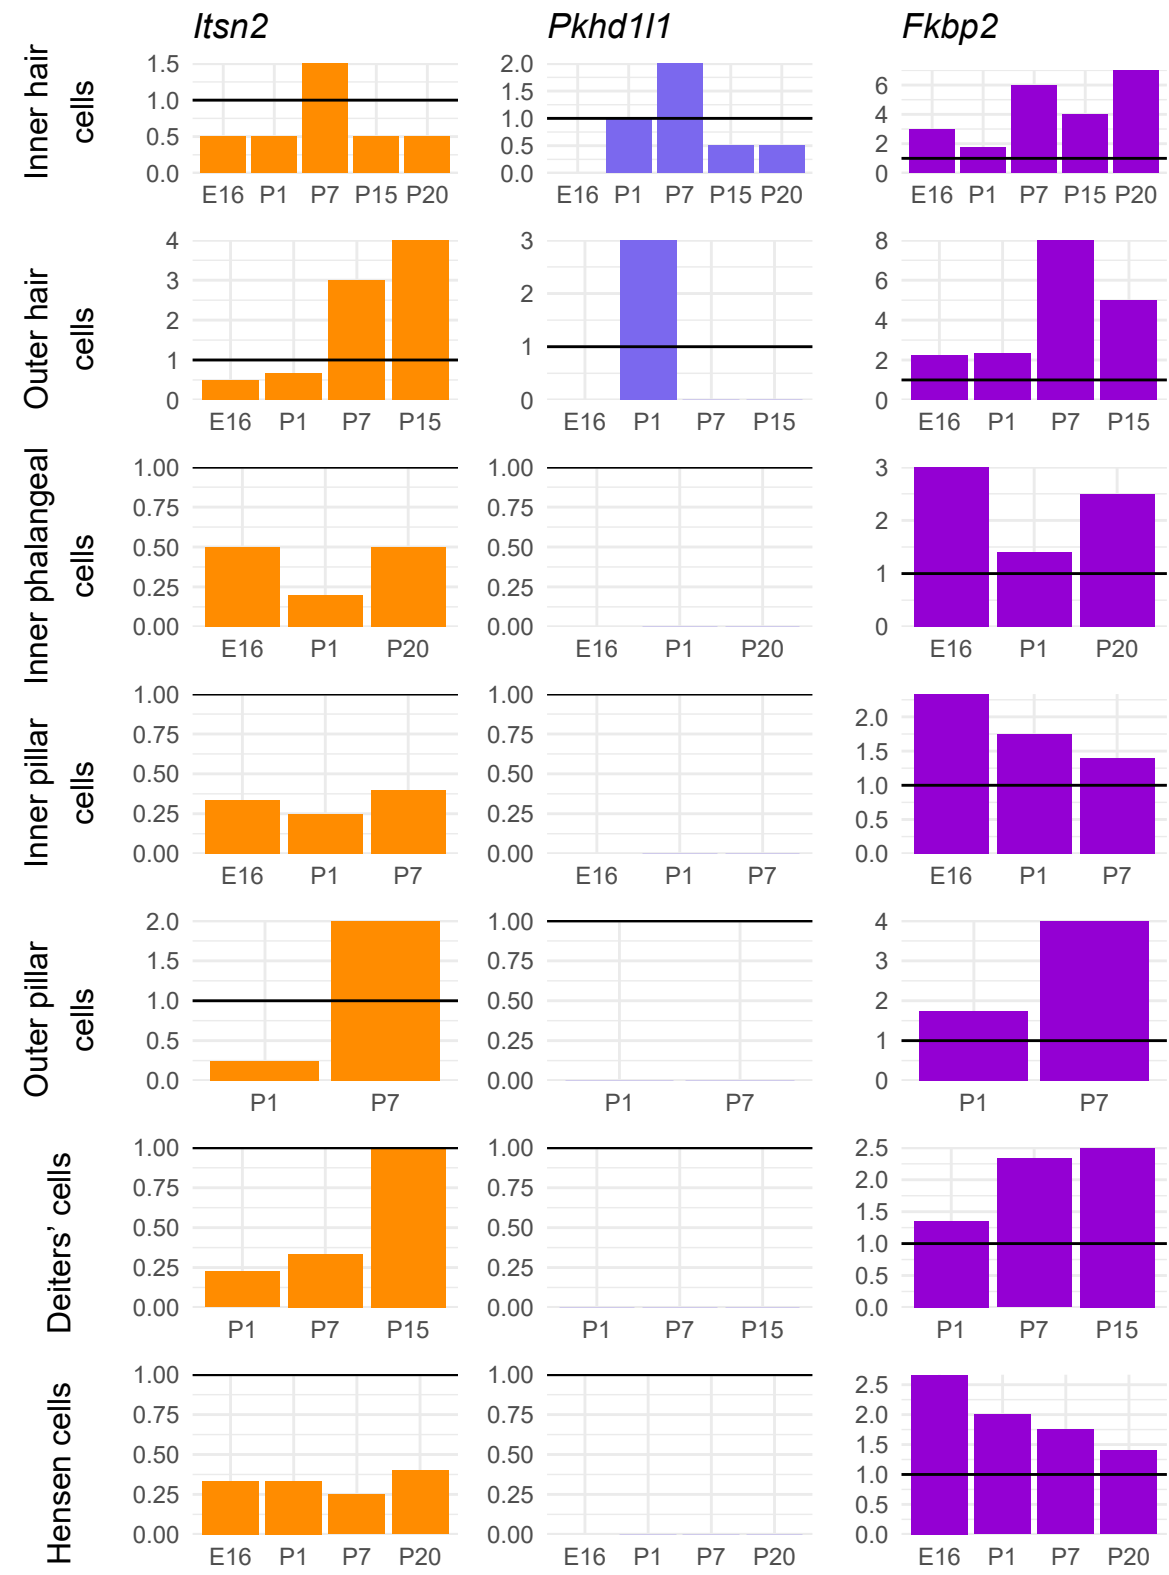

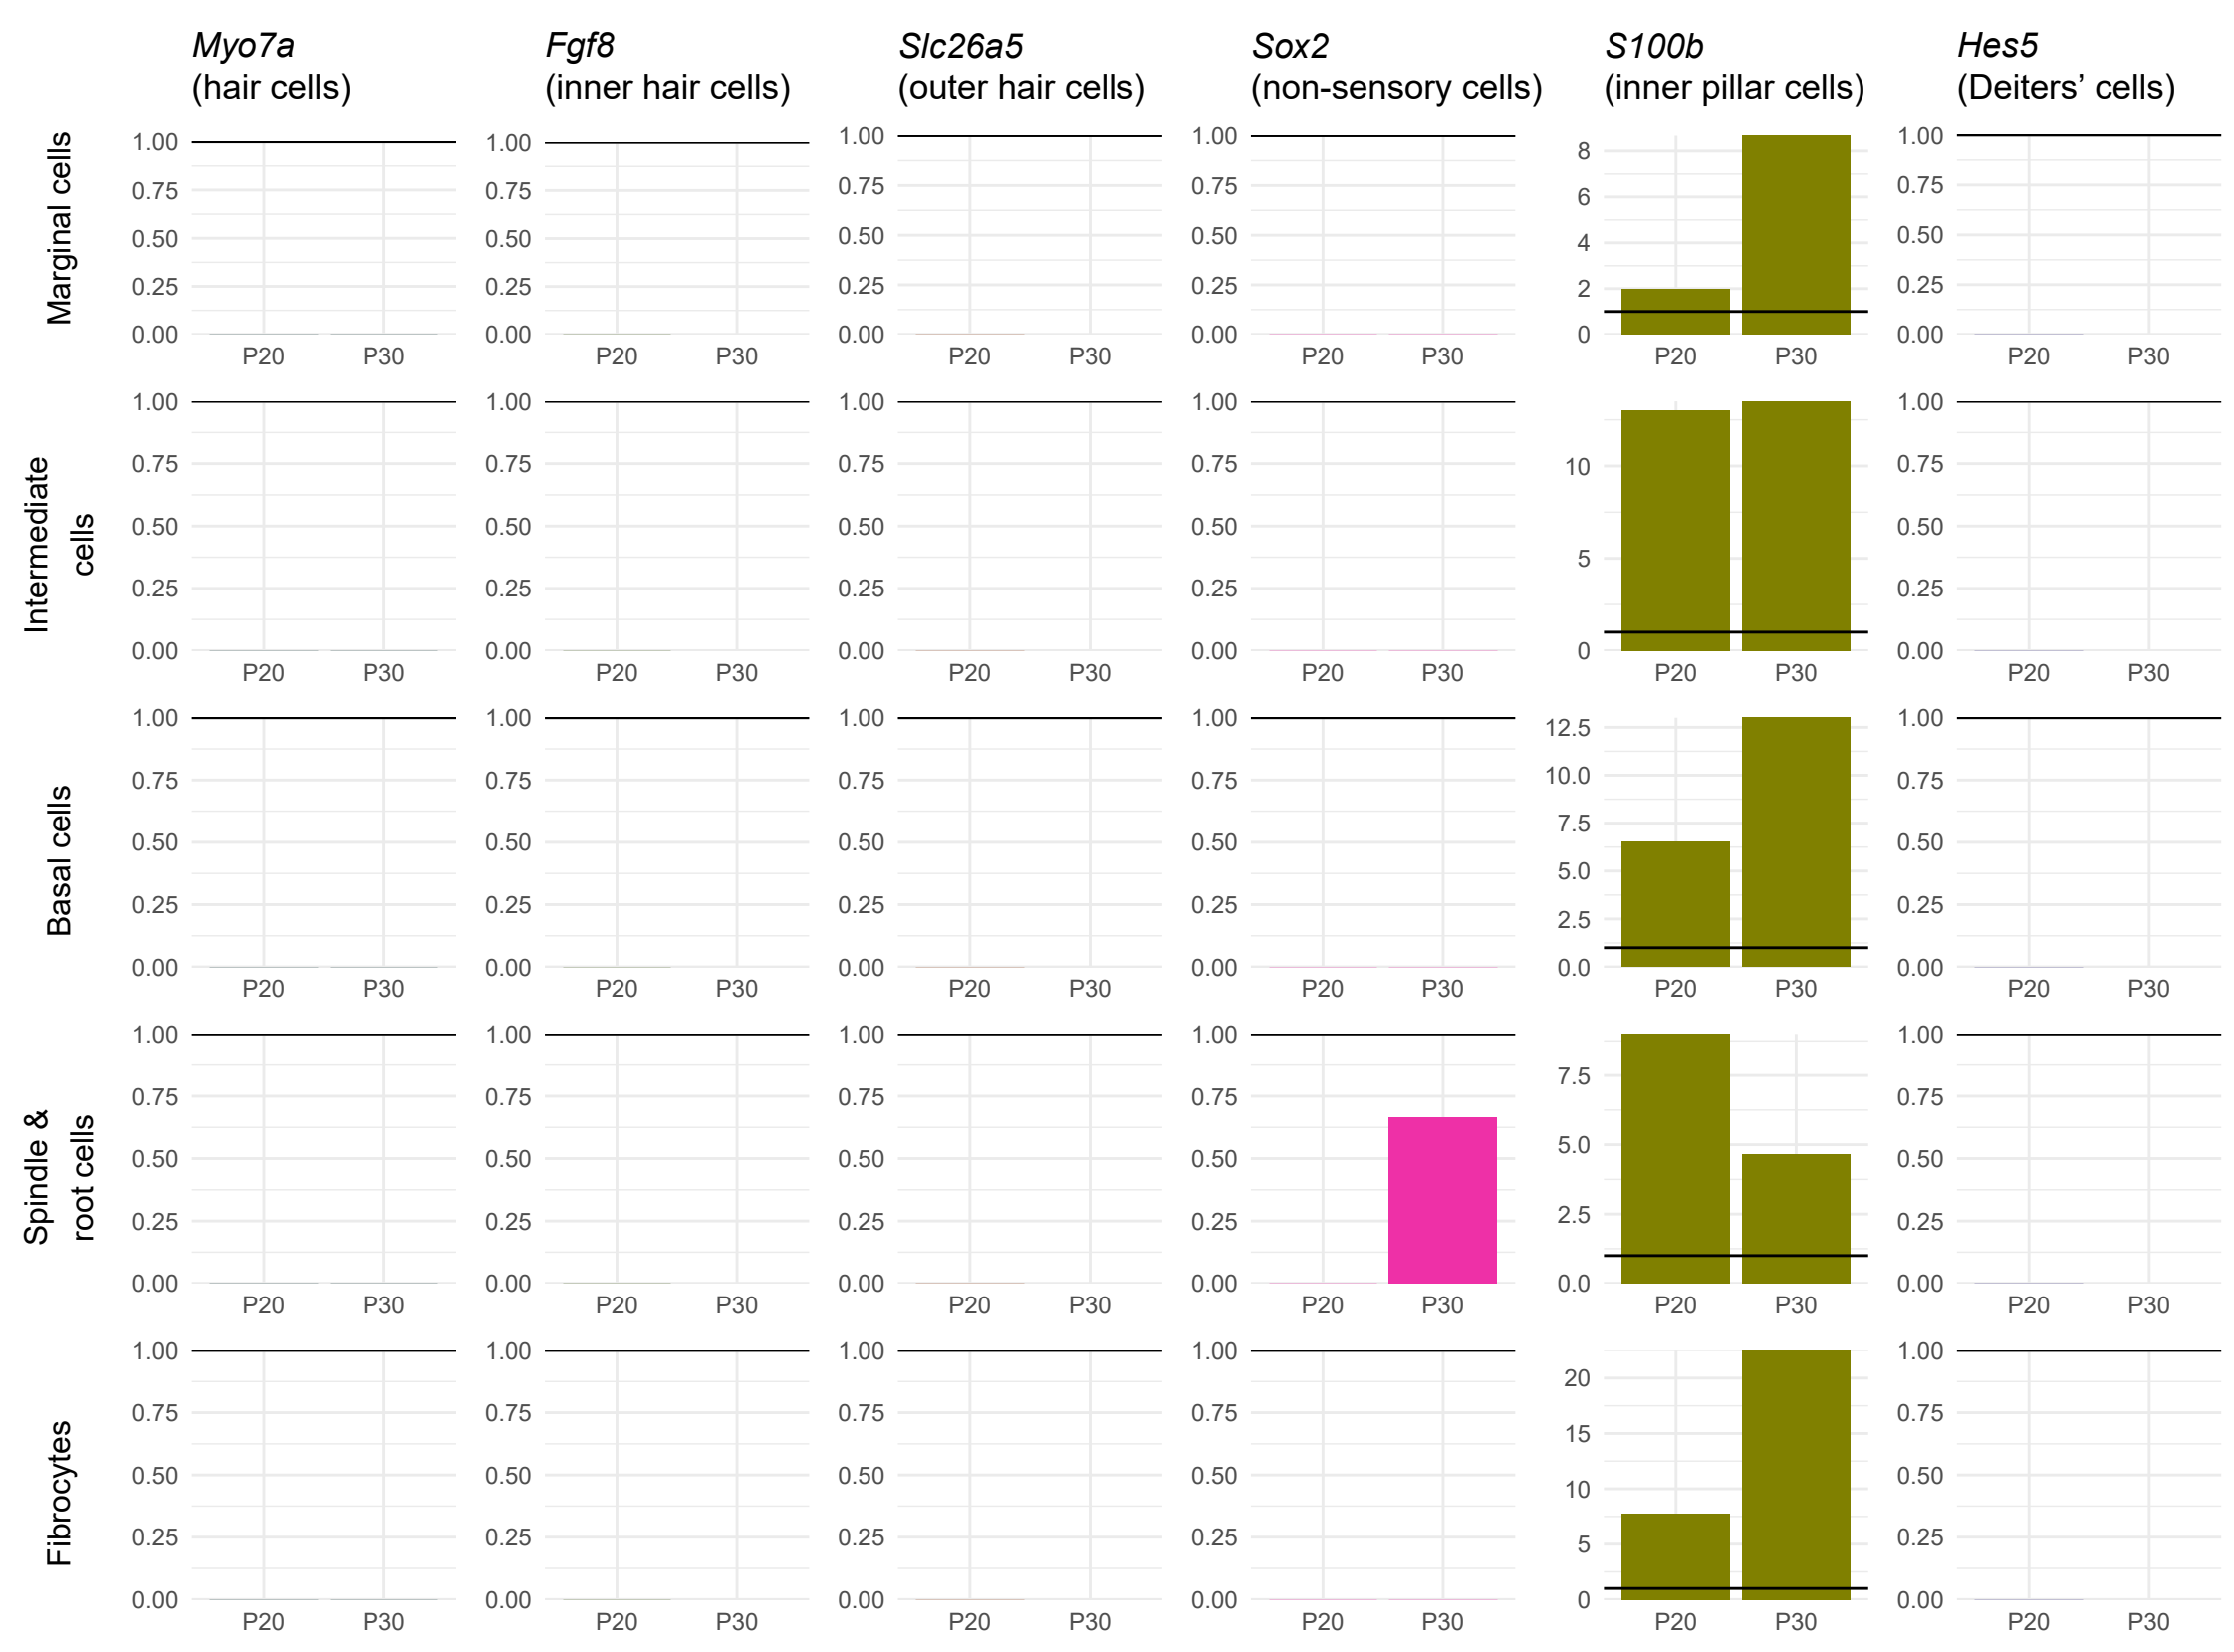

*Kcne1*  
(marginal cells)

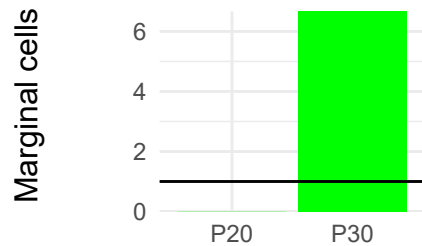

*Met*  
(intermediate cells)

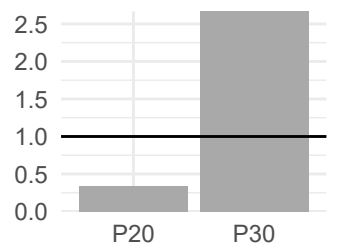

*Cldn11*  
(basal cells)

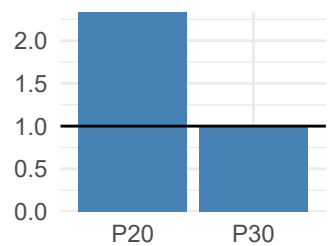

*Slc26a4*  
(spindle & root cells)

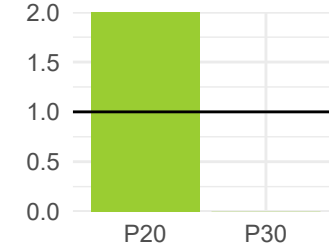

*Gm525*  
(fibrocytes)

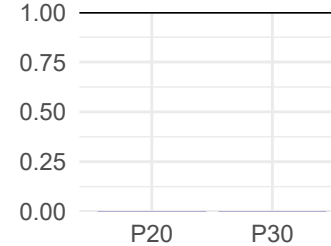

*Syne2*

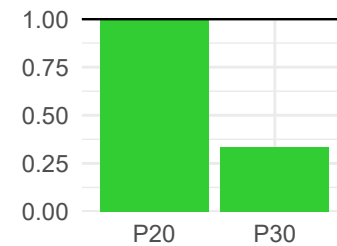

Intermediate  
cells

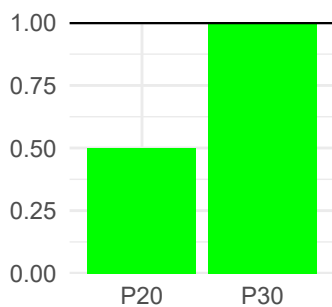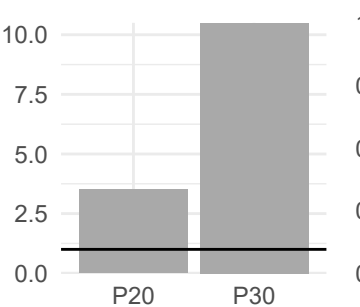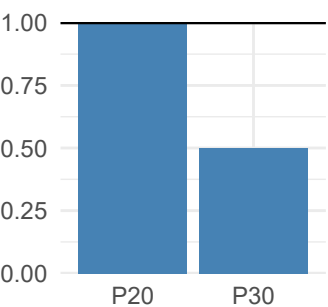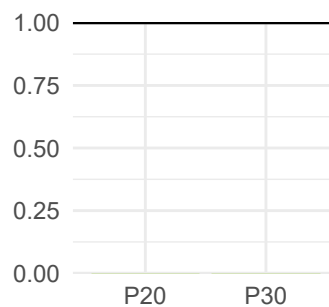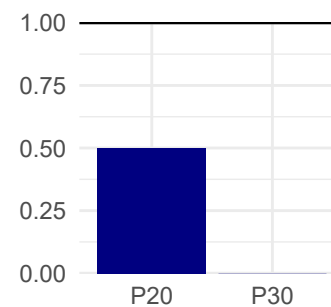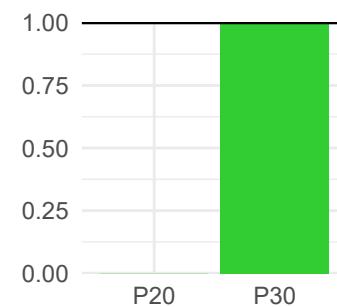

Basal cells

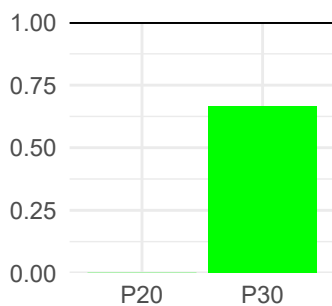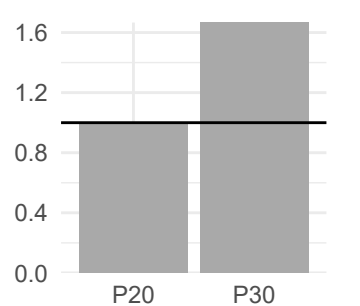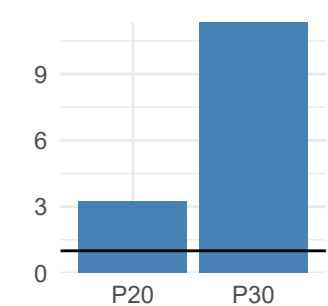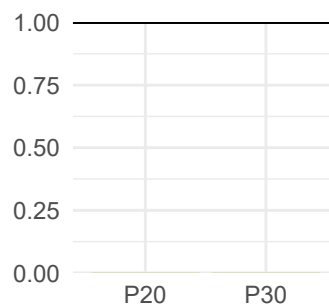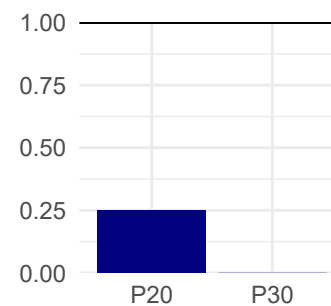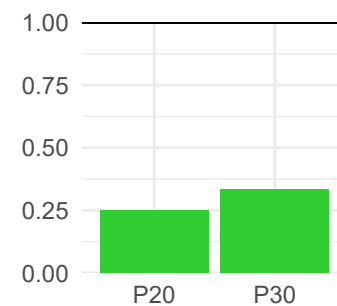

Spindle &  
root cells

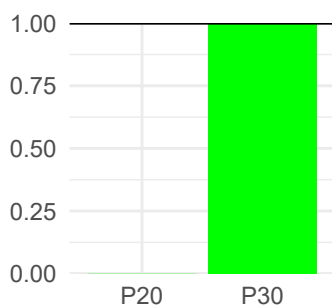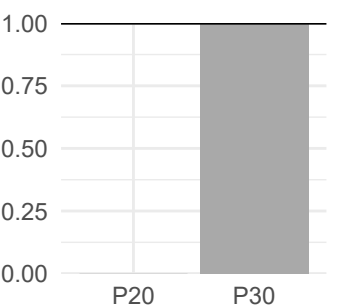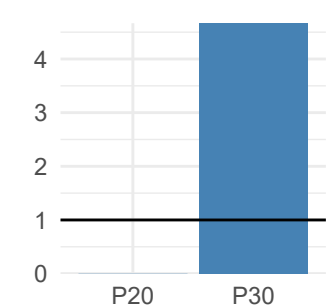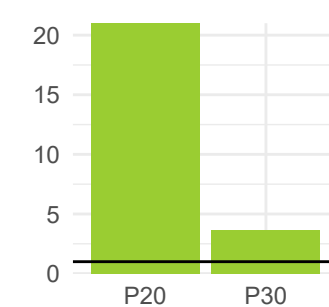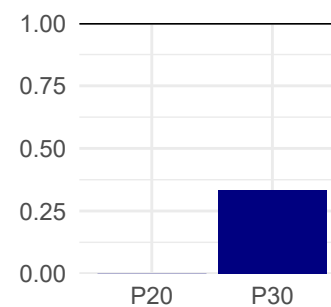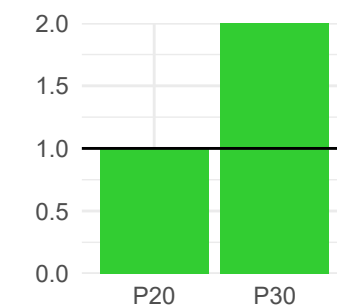

Fibrocytes

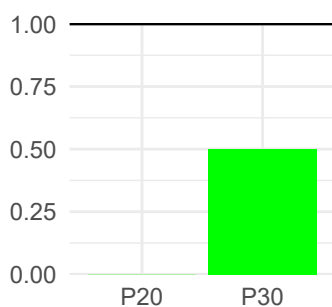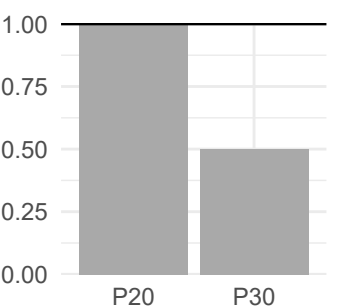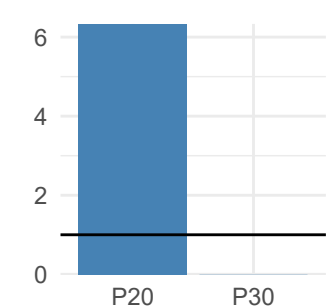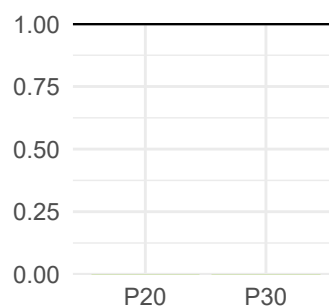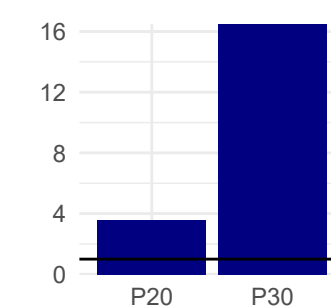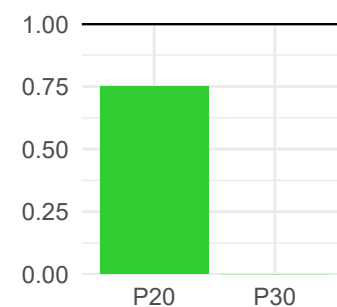



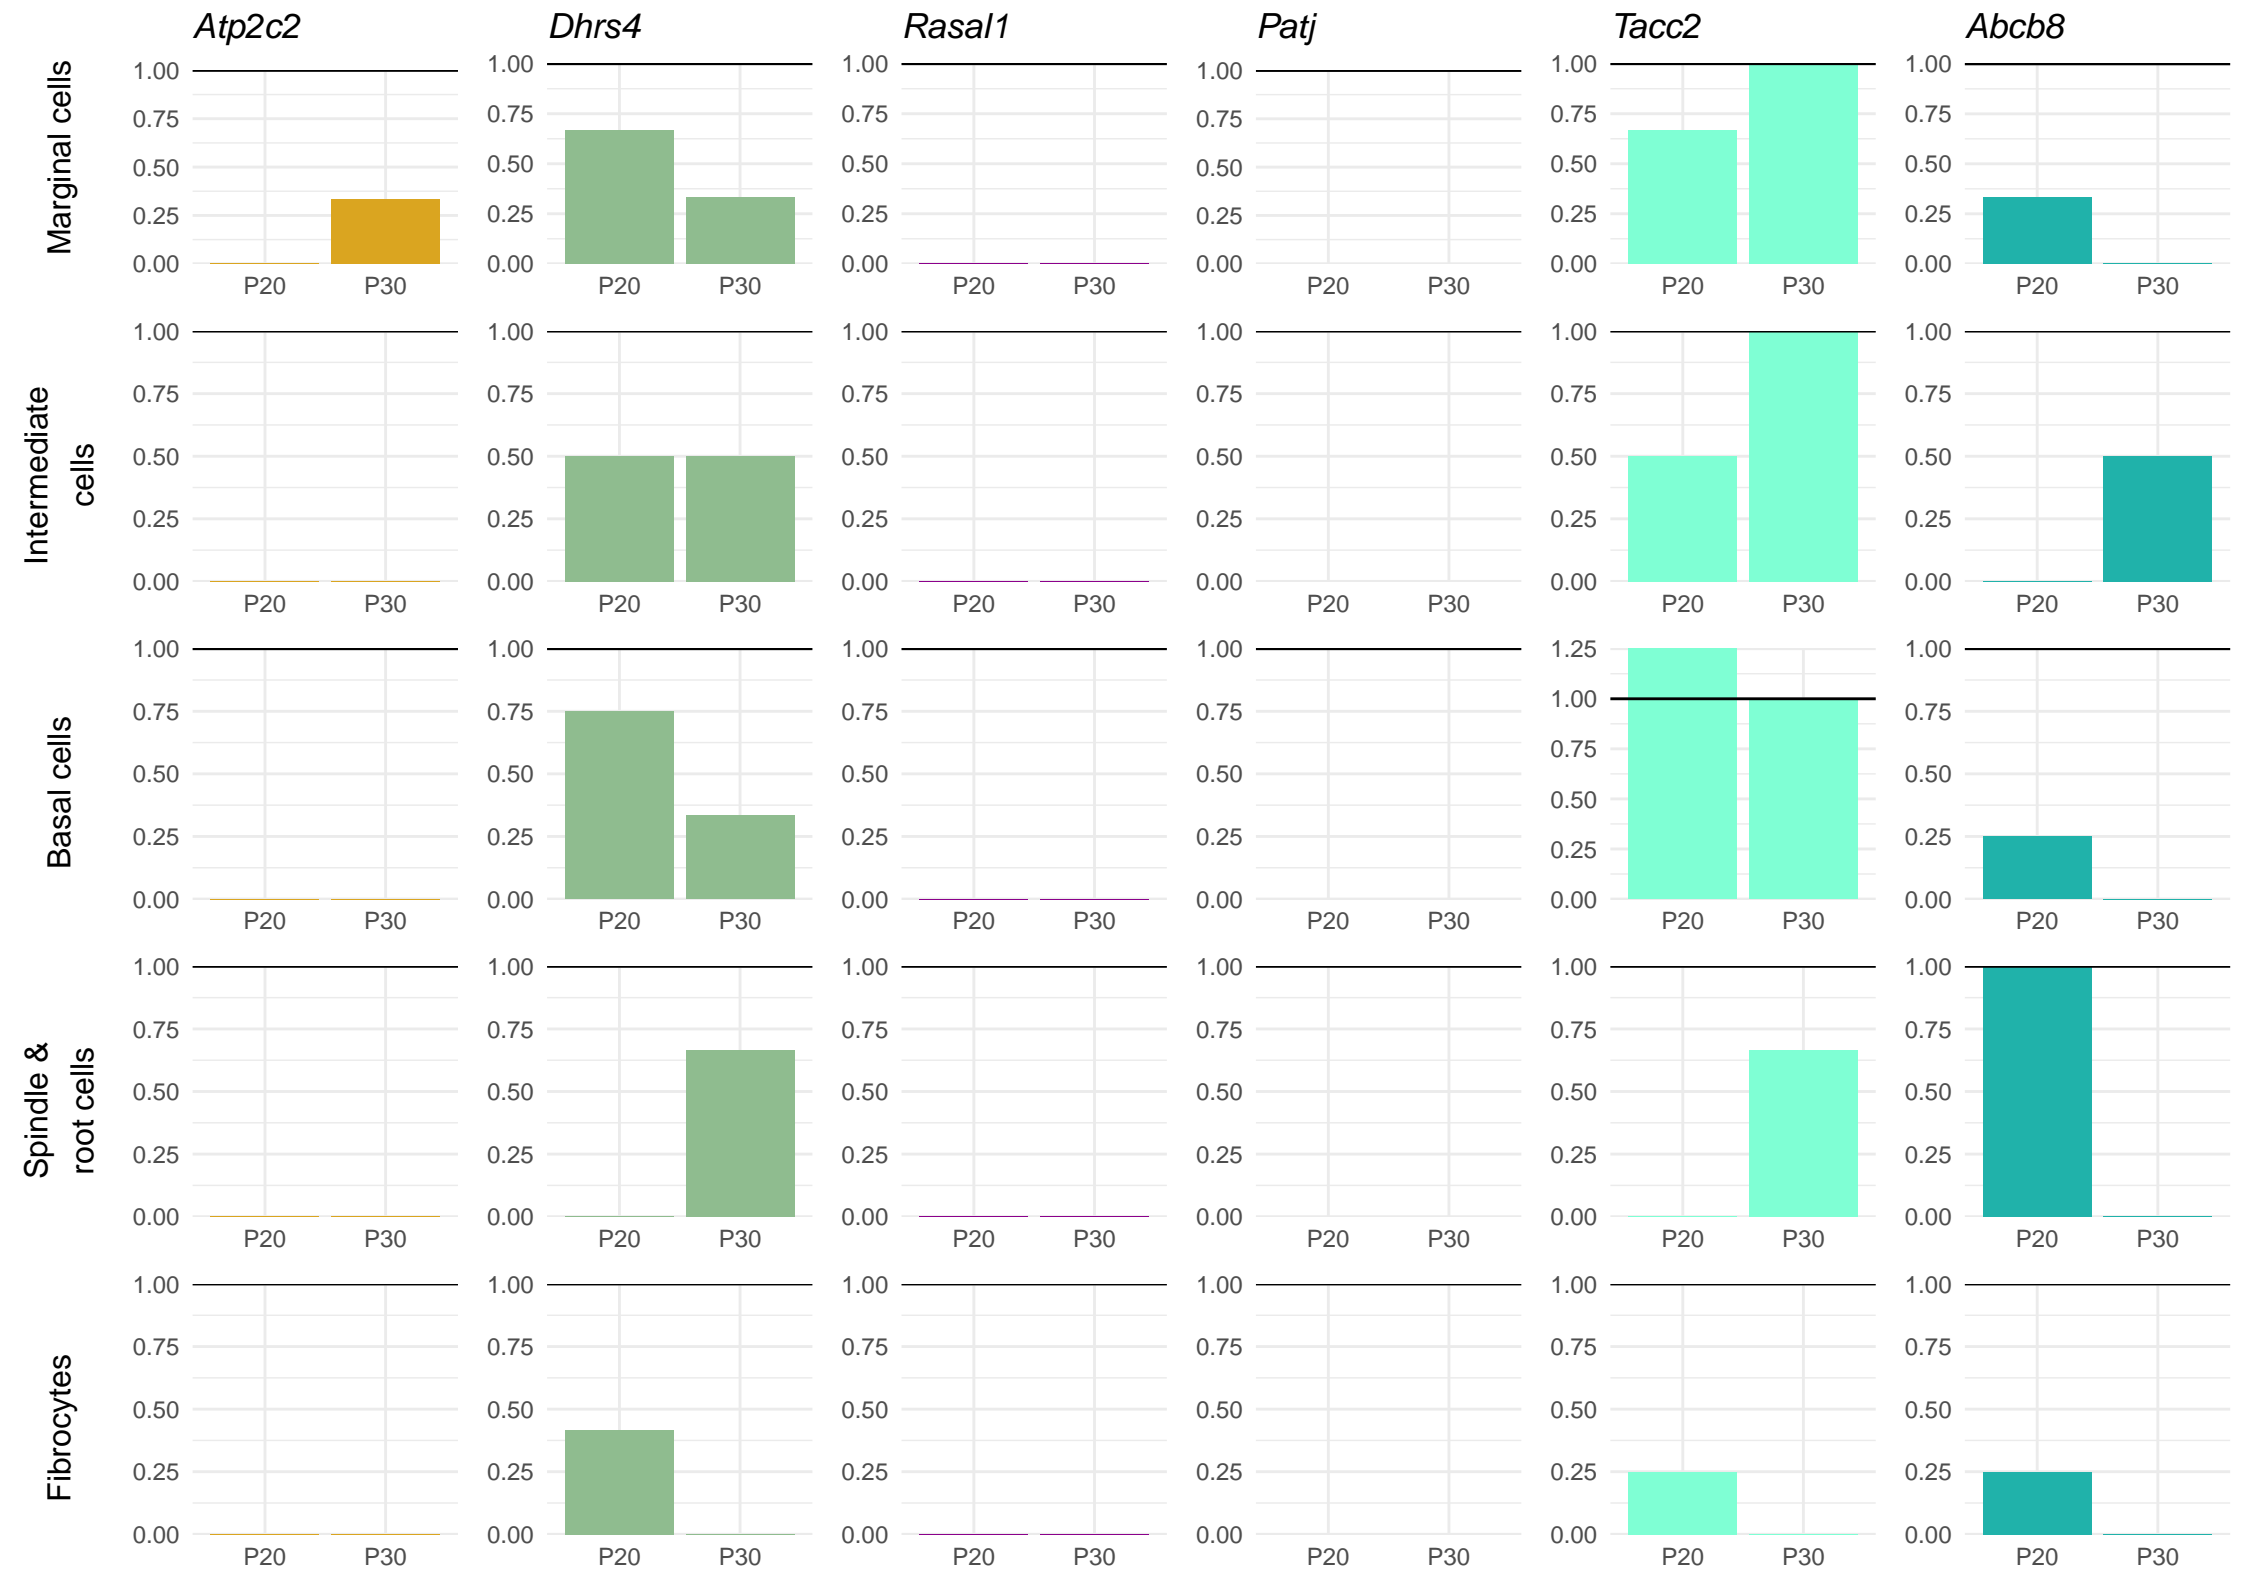

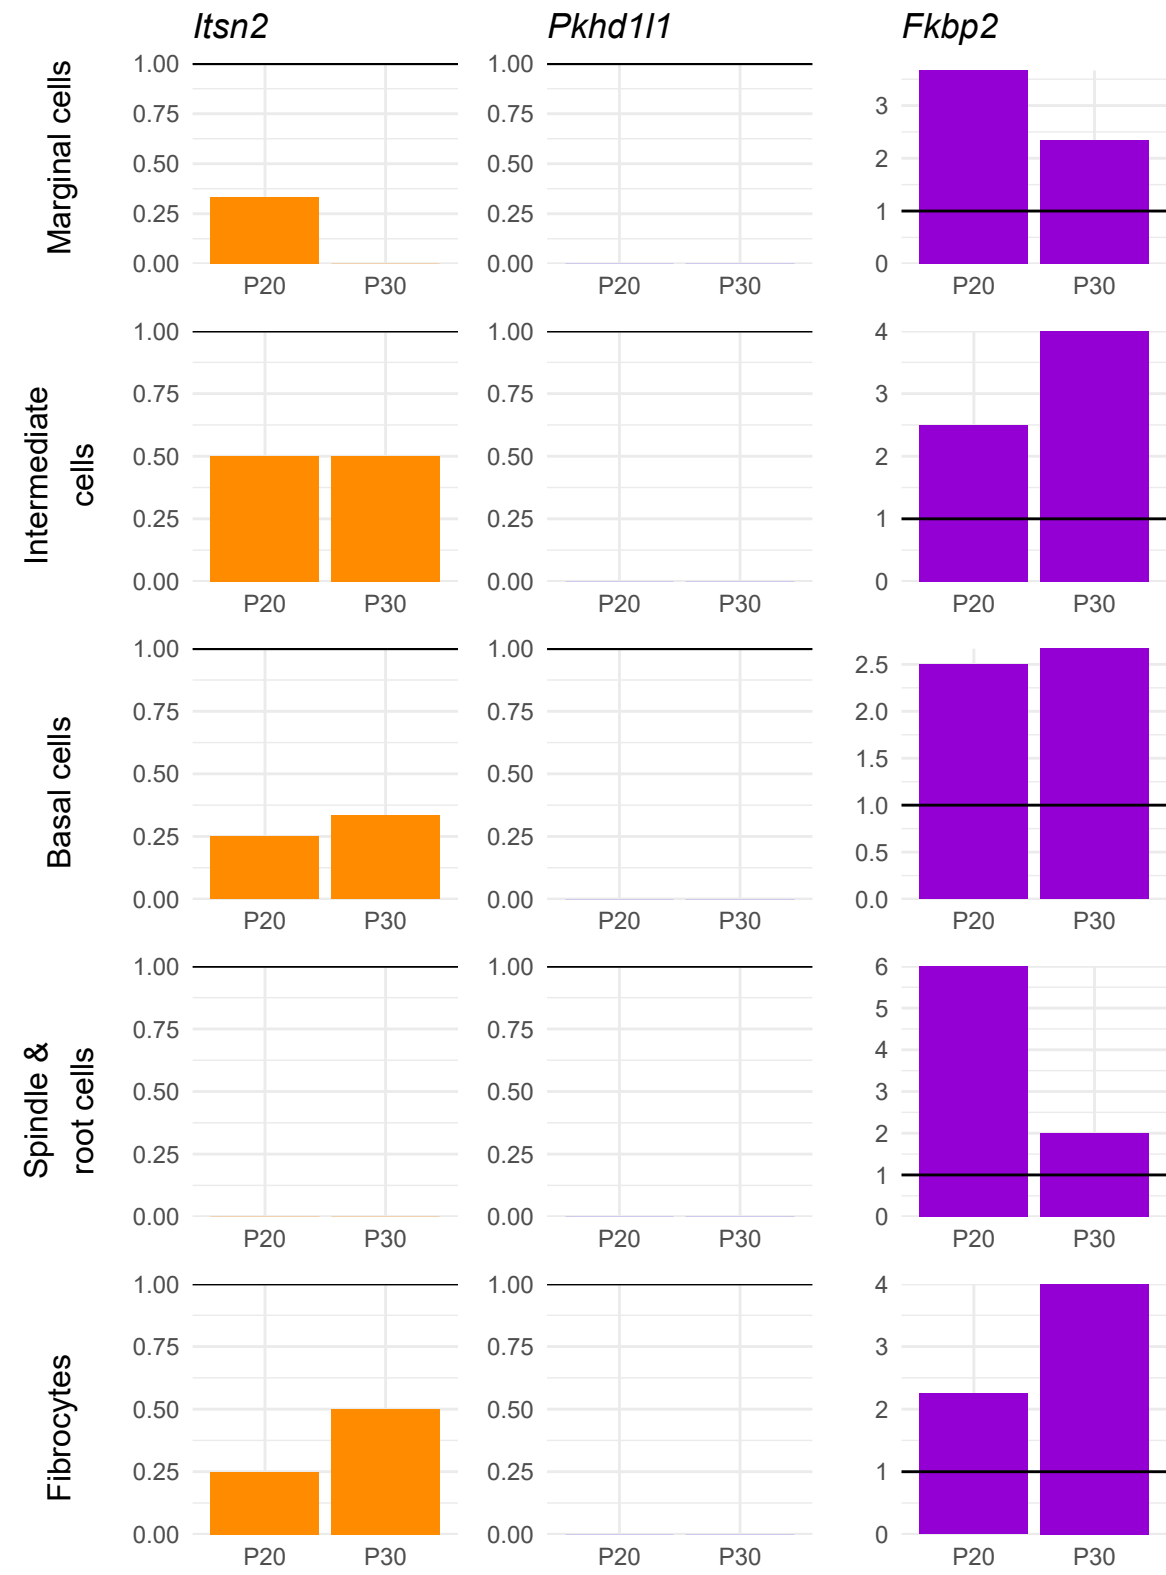

**Suppl. Figure 5.** Plots of gene expression in different cell types of the mouse inner ear, from single cell RNAseq data. These are genes identified in 3 cohorts (MUSC, TwinsUK and UK Biobank (Lewis et al. 2022)). Expression was normalised to *Hprt* (represented by a horizontal line at  $y=1$  on each plot). Marker genes have been included for comparison (*Myo7a* (hair cells), *Fgf8* (inner hair cells), *Slc26a5* (outer hair cells), *Sox2* (non-sensory cells), *S100b* (inner pillar cells), *Hes5* (Deiters' cells), *Kcne1* (marginal cells), *Met* (intermediate cells), *Cldn11* (basal cells), *Slc26a4* (spindle and root cells), *Gm525* (fibrocytes)). Datasets were obtained from the gEAR (<http://umgear.org>) (Kolla et al. 2020; Korrapati et al. 2019; Ranum et al. 2019; Xue et al. 2021).

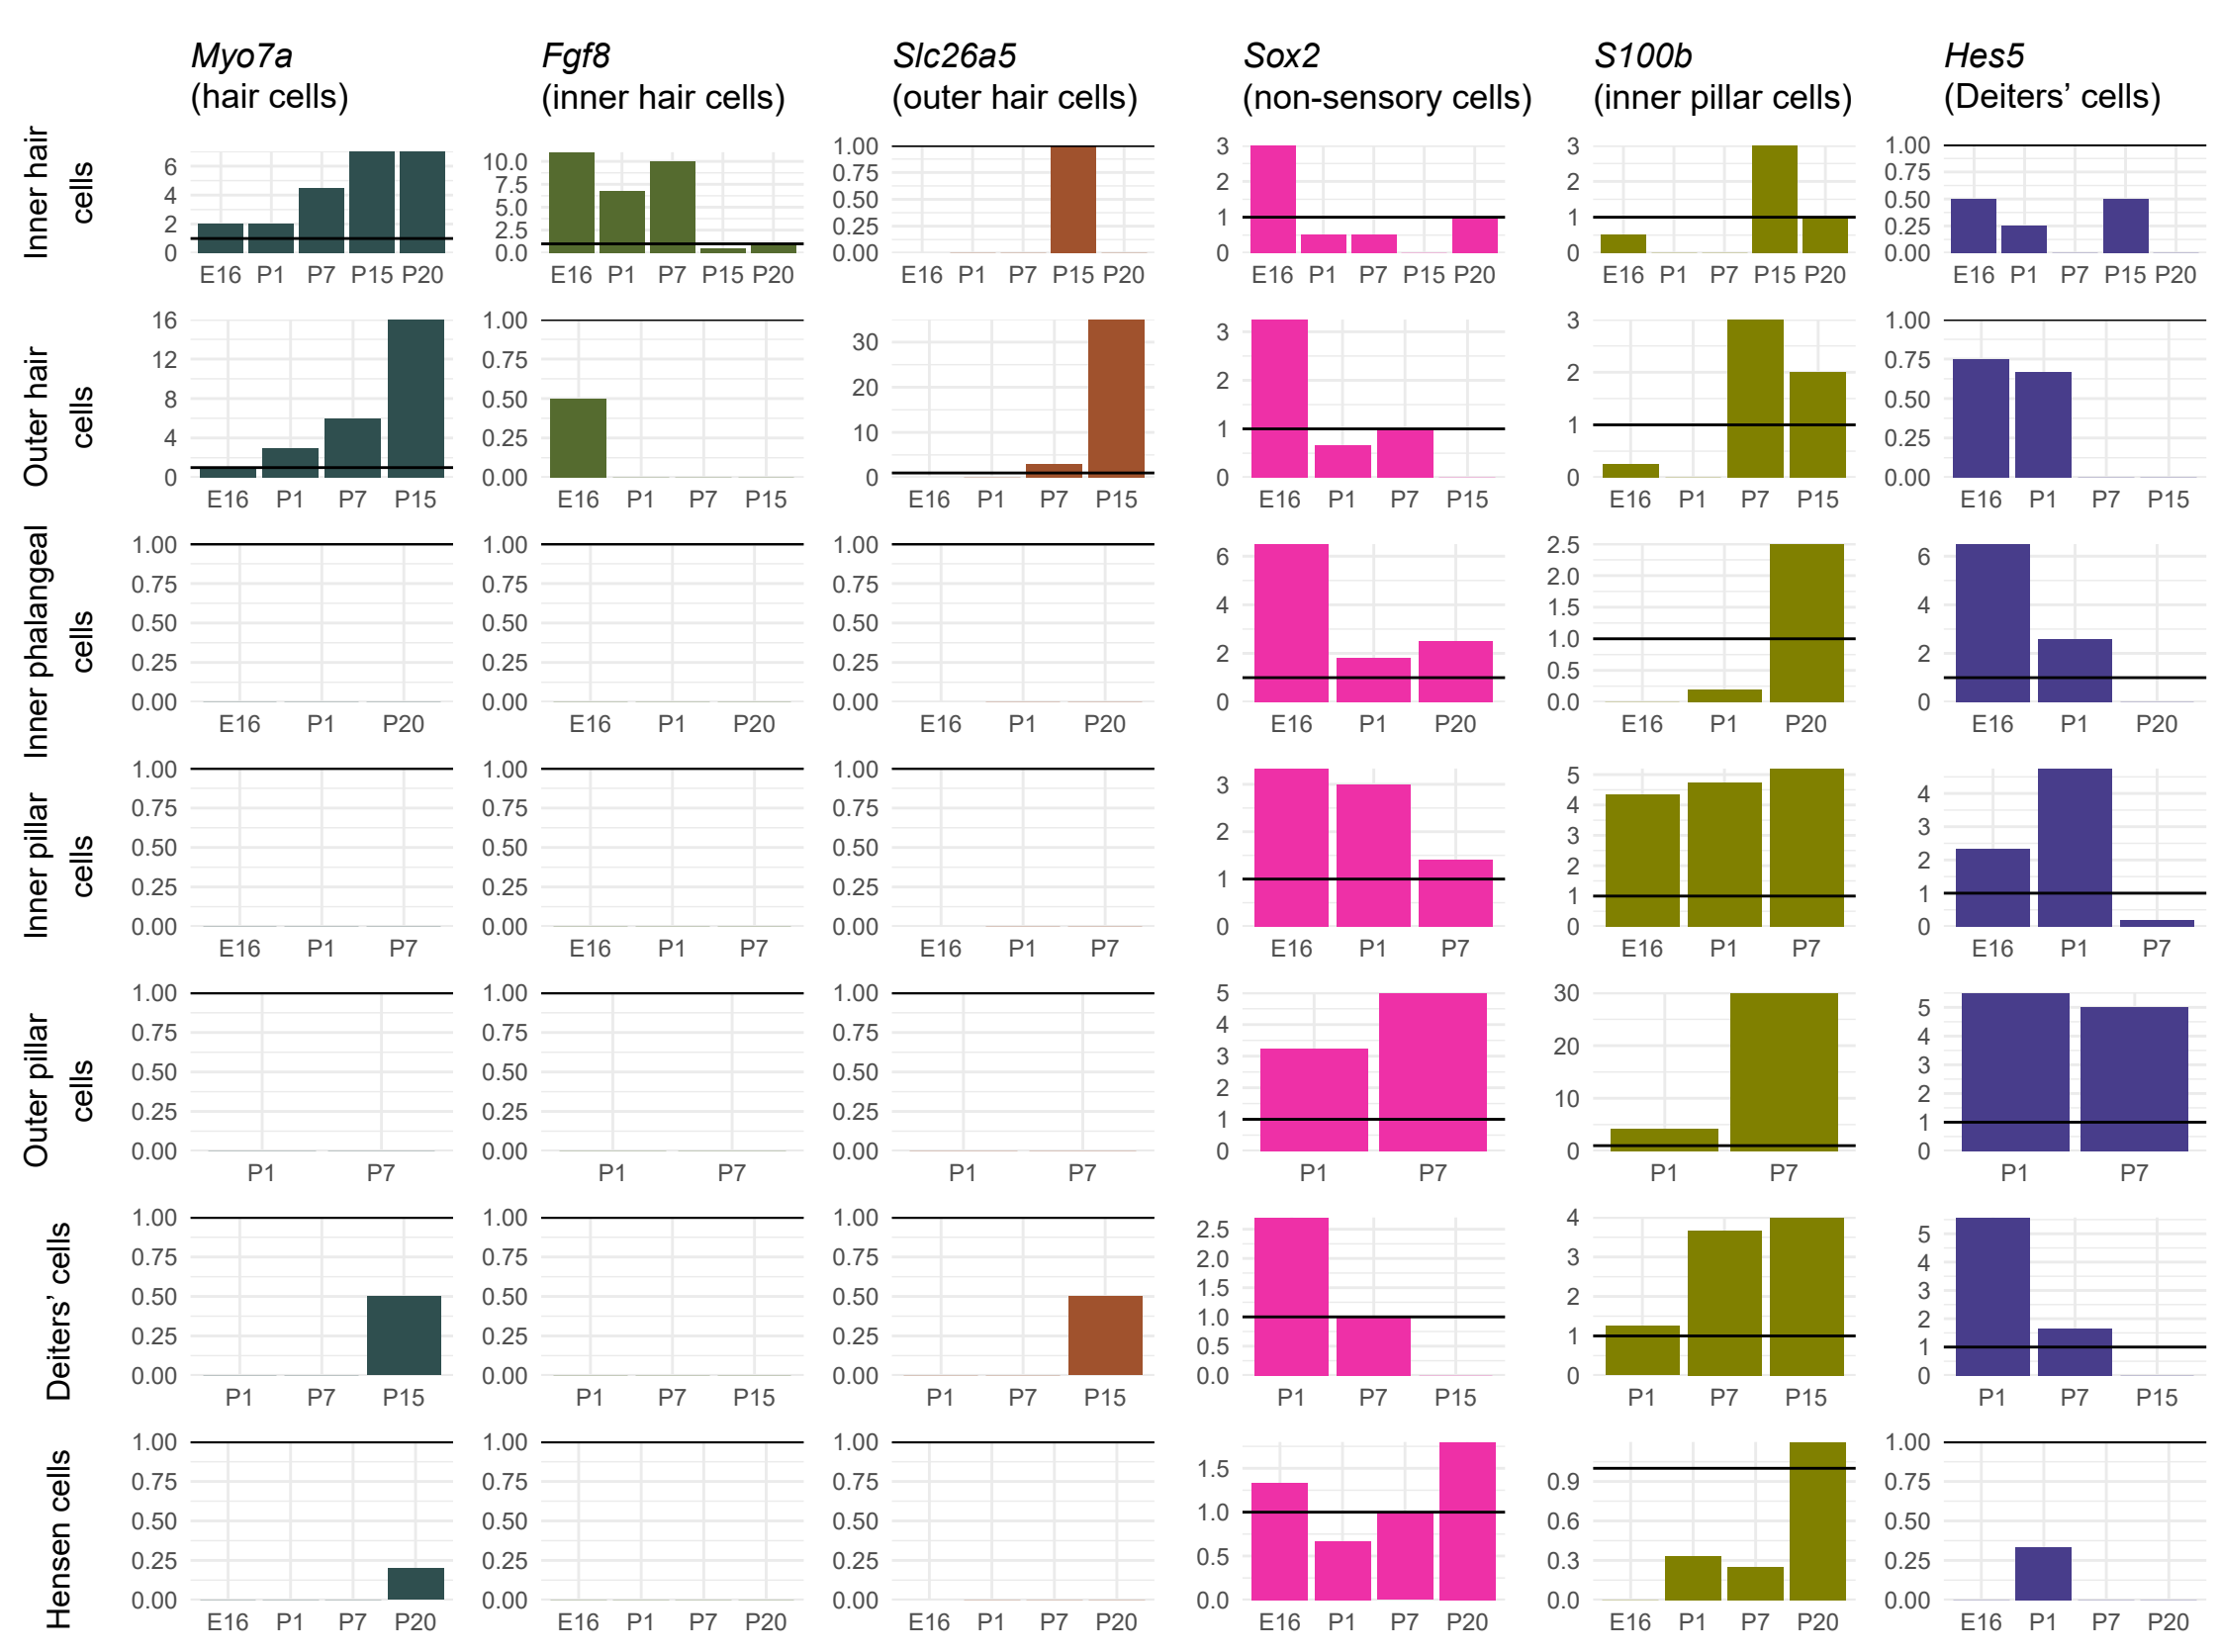

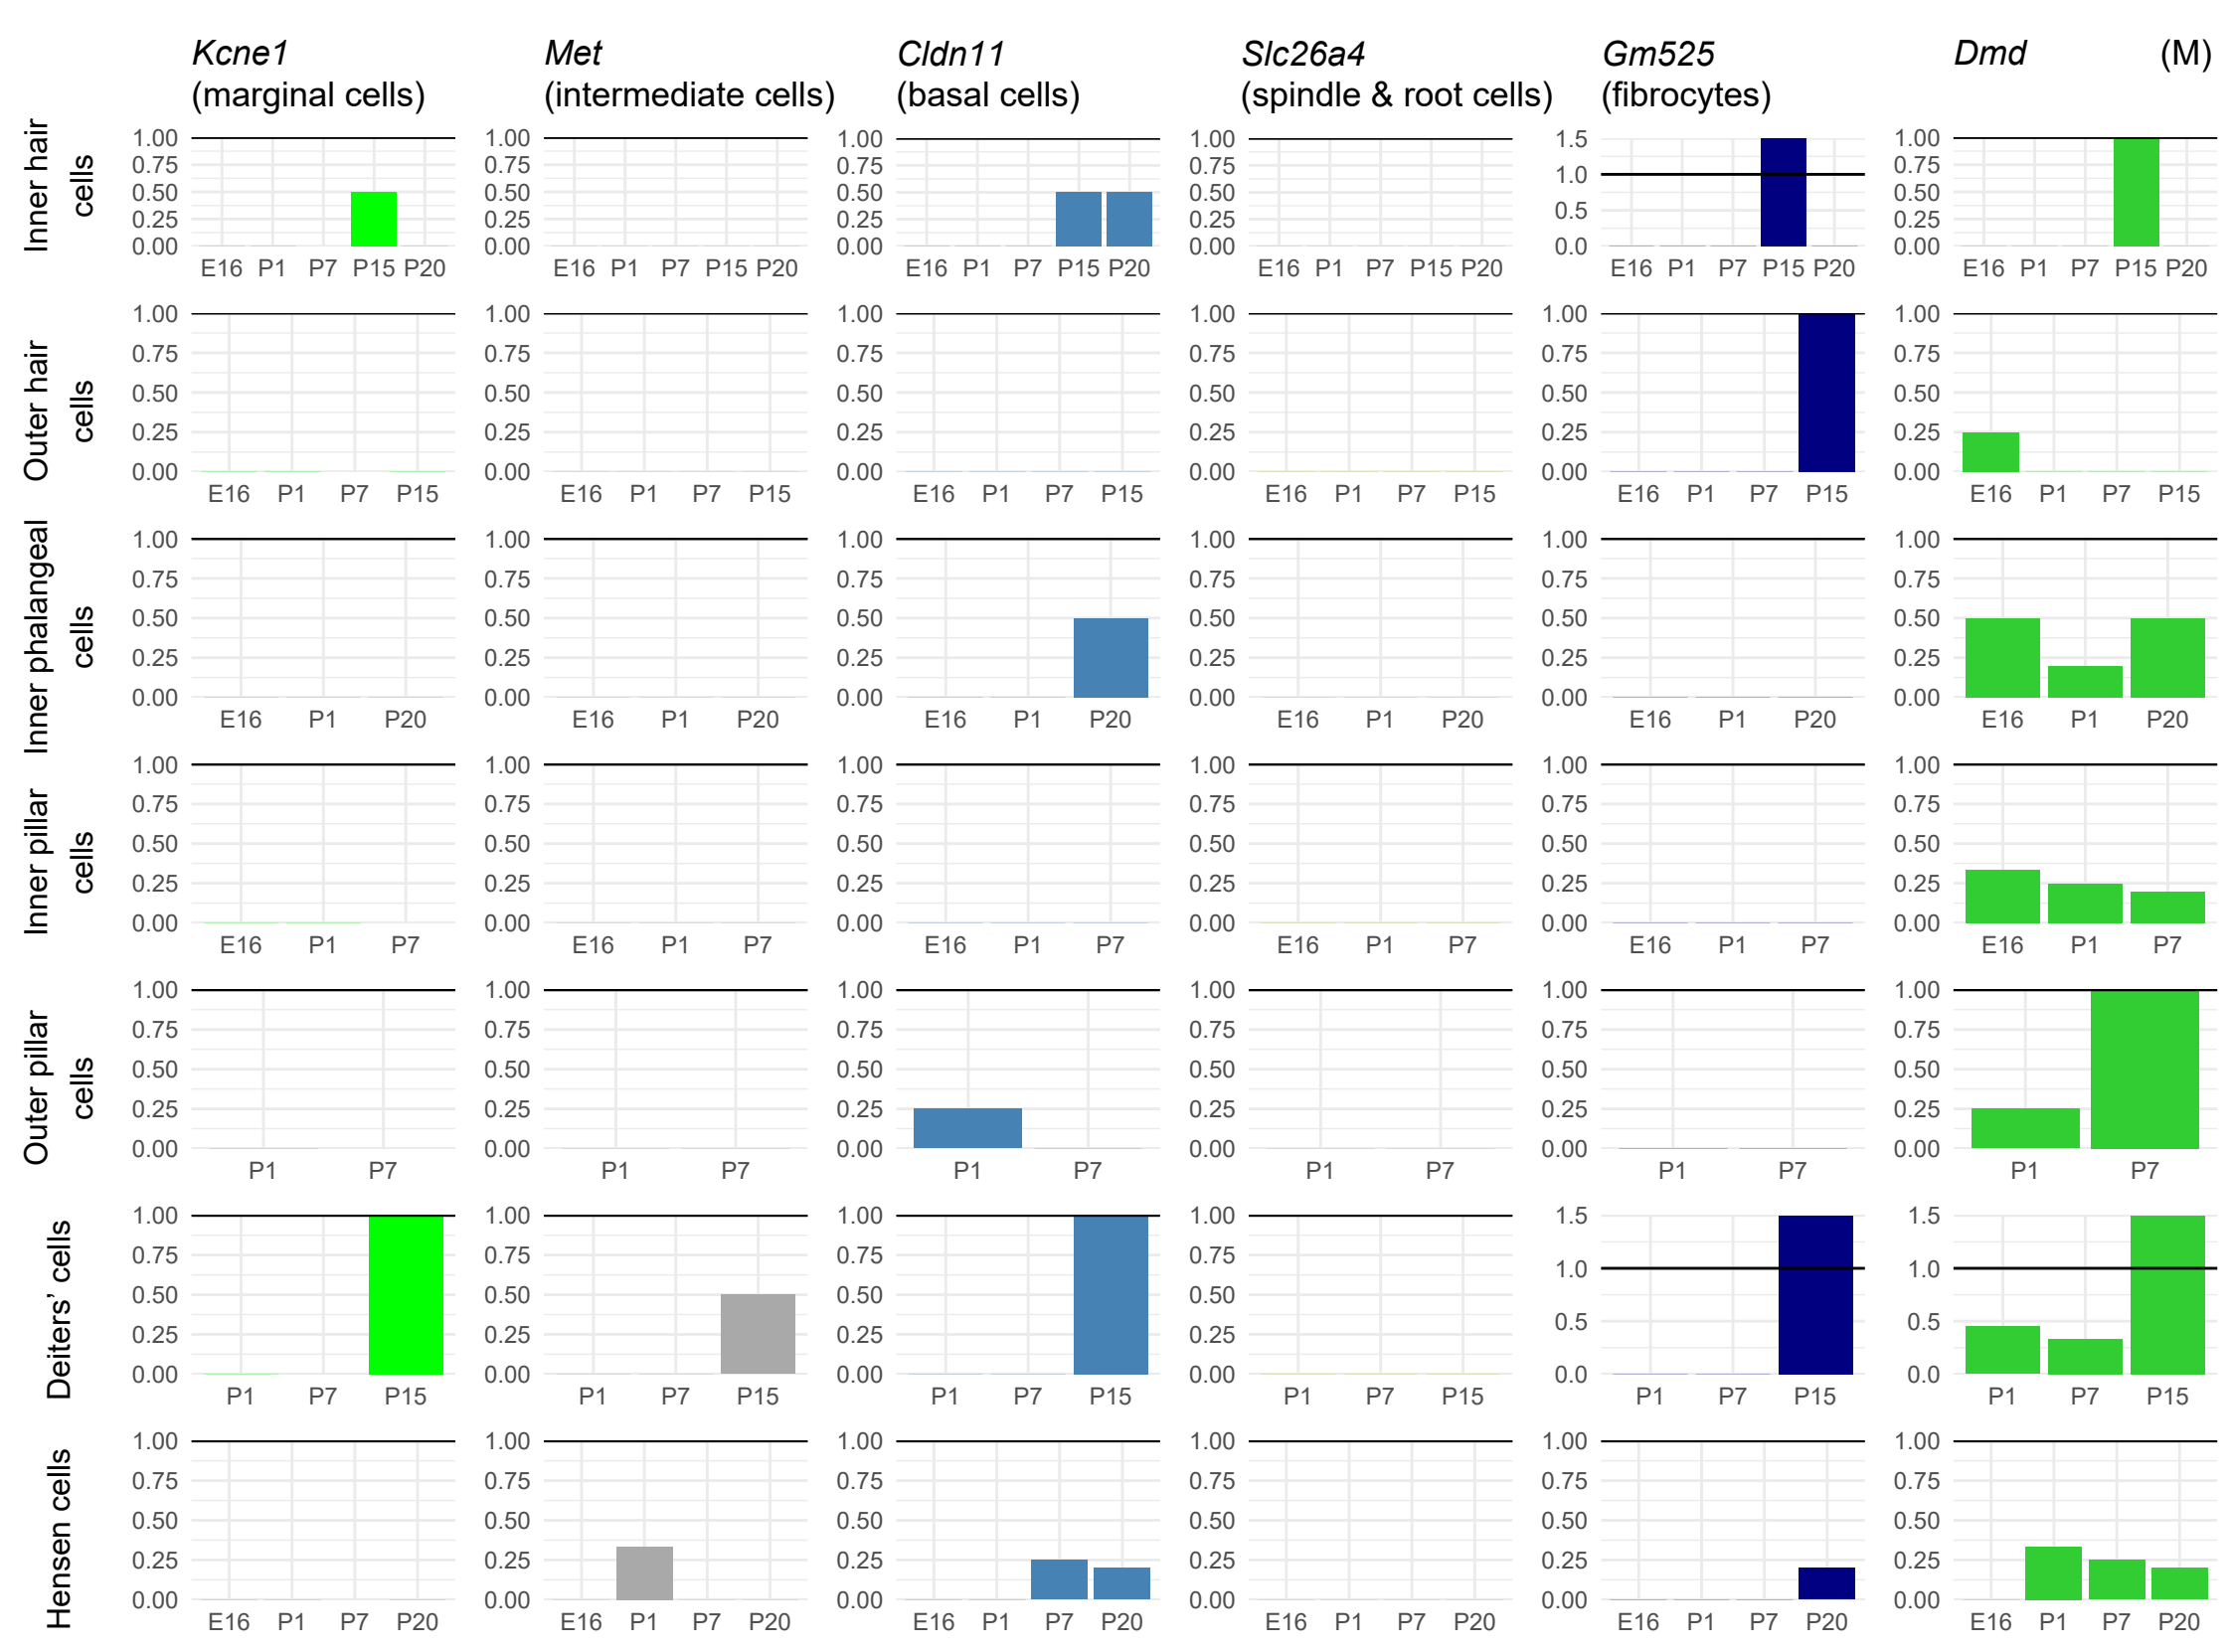

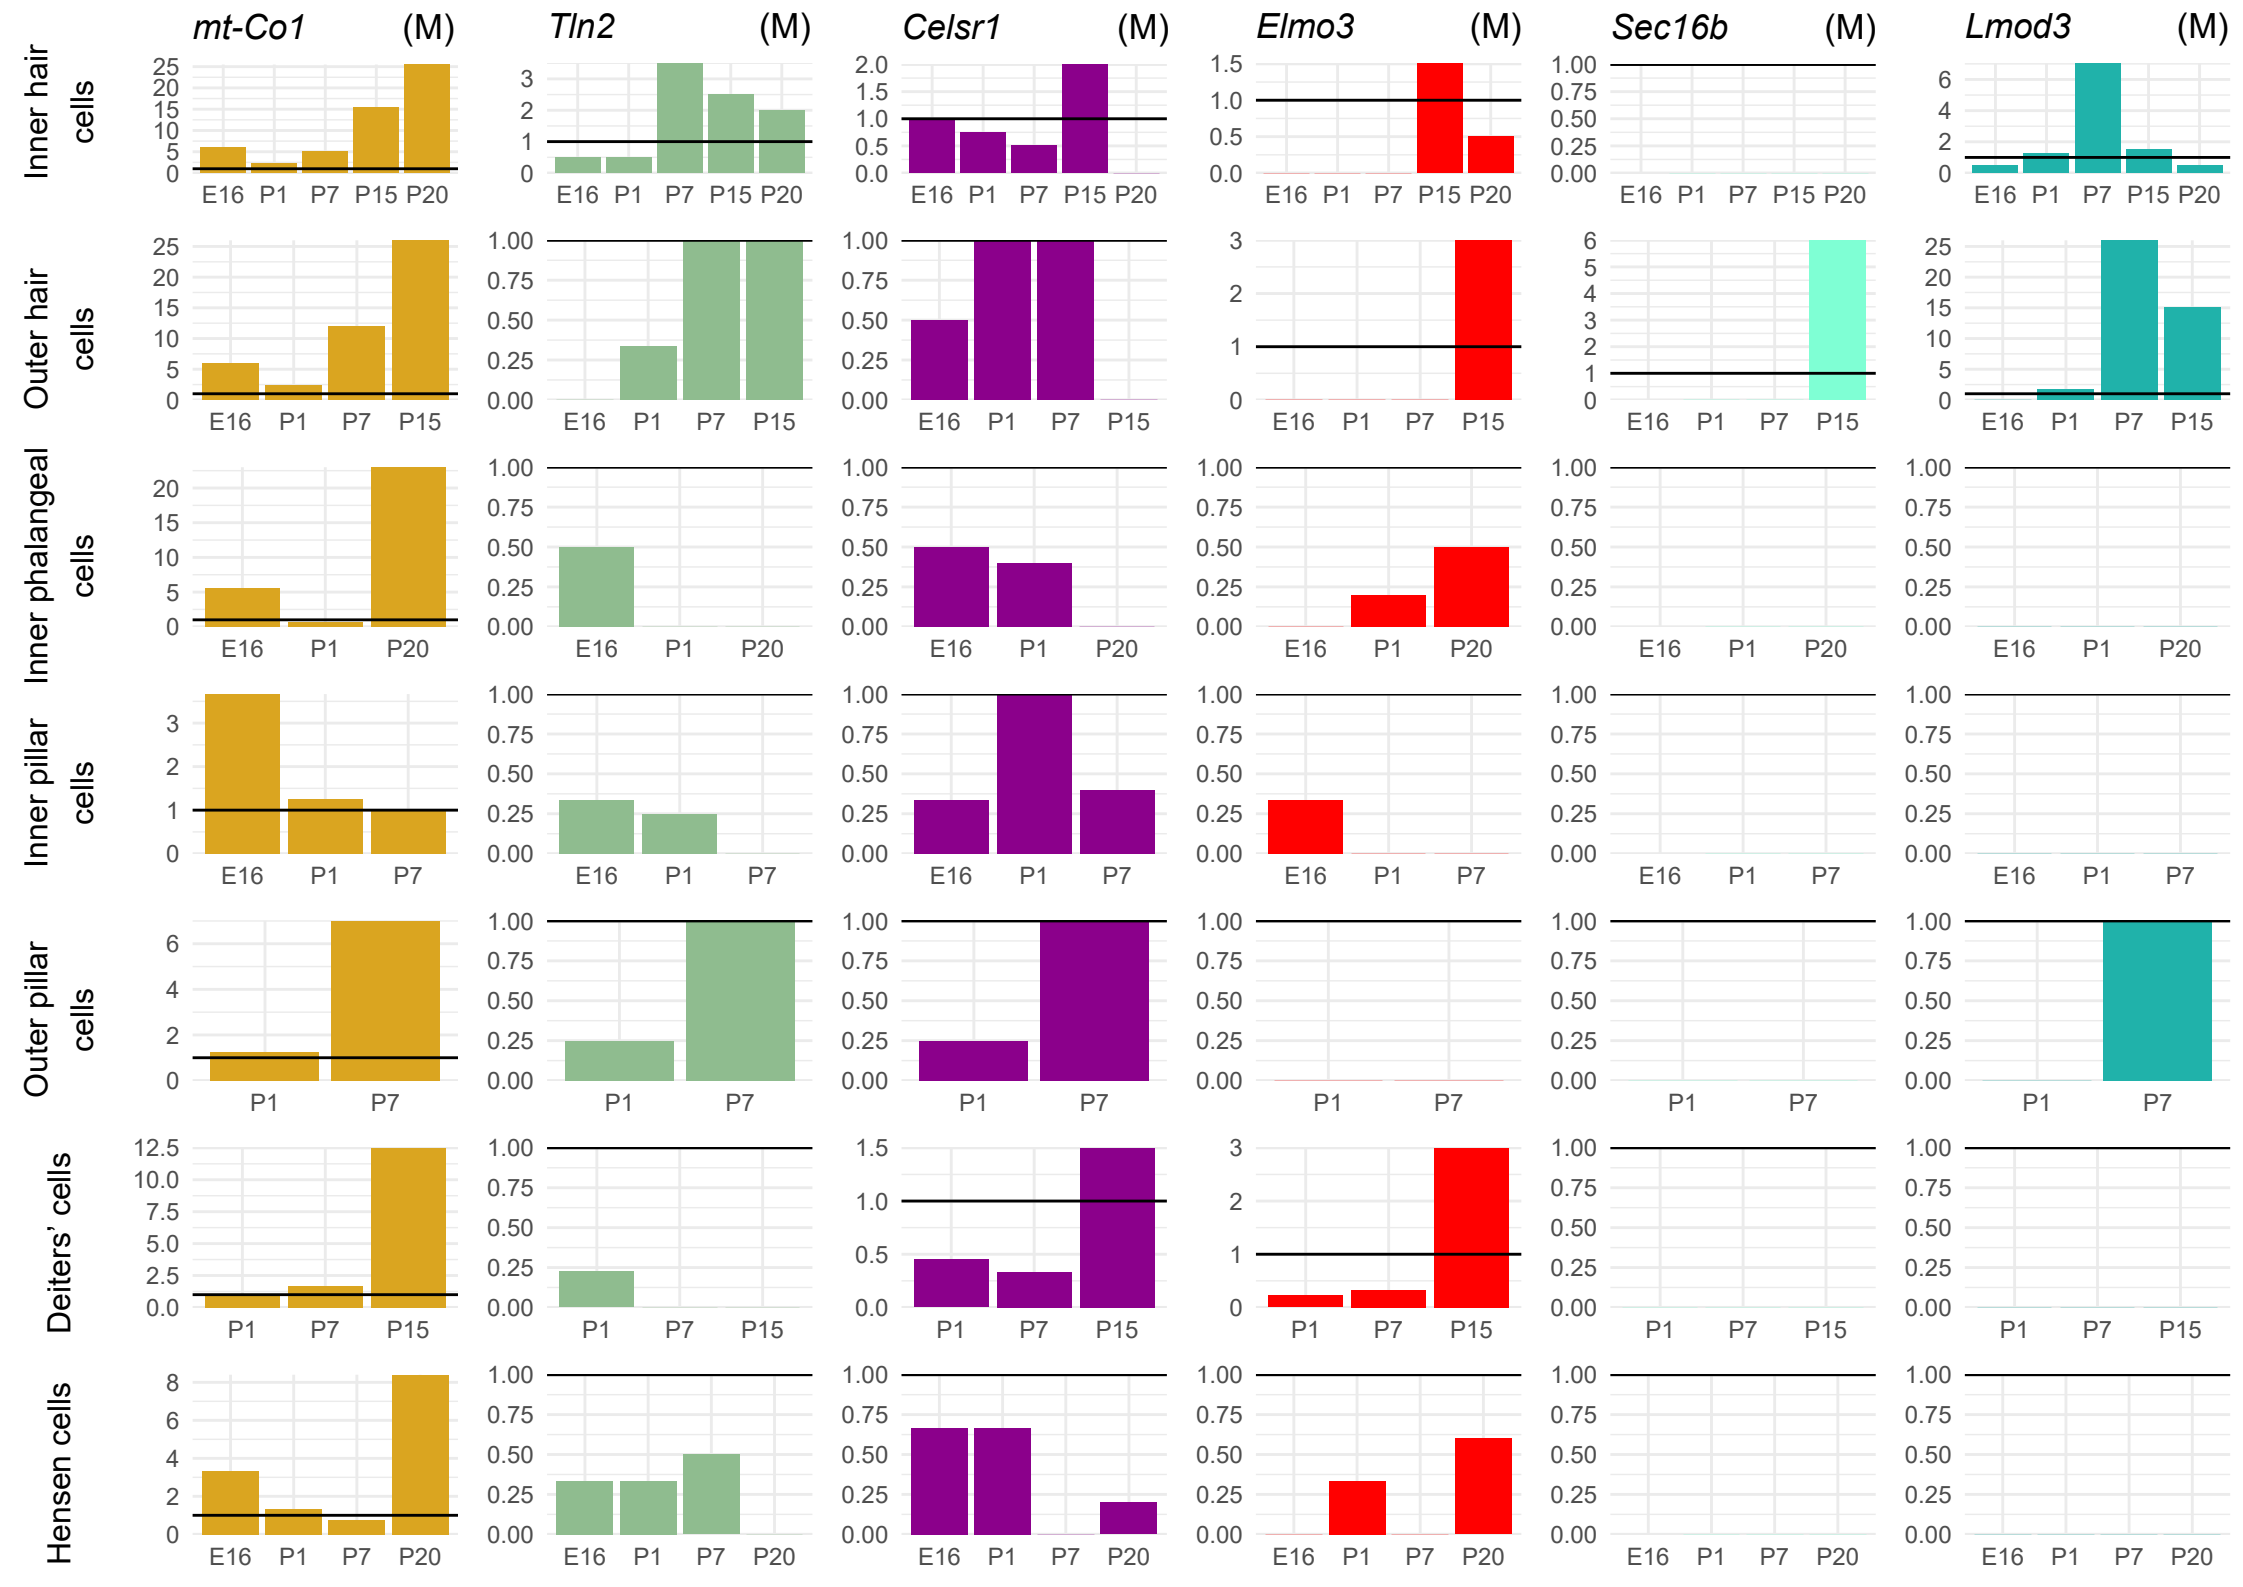

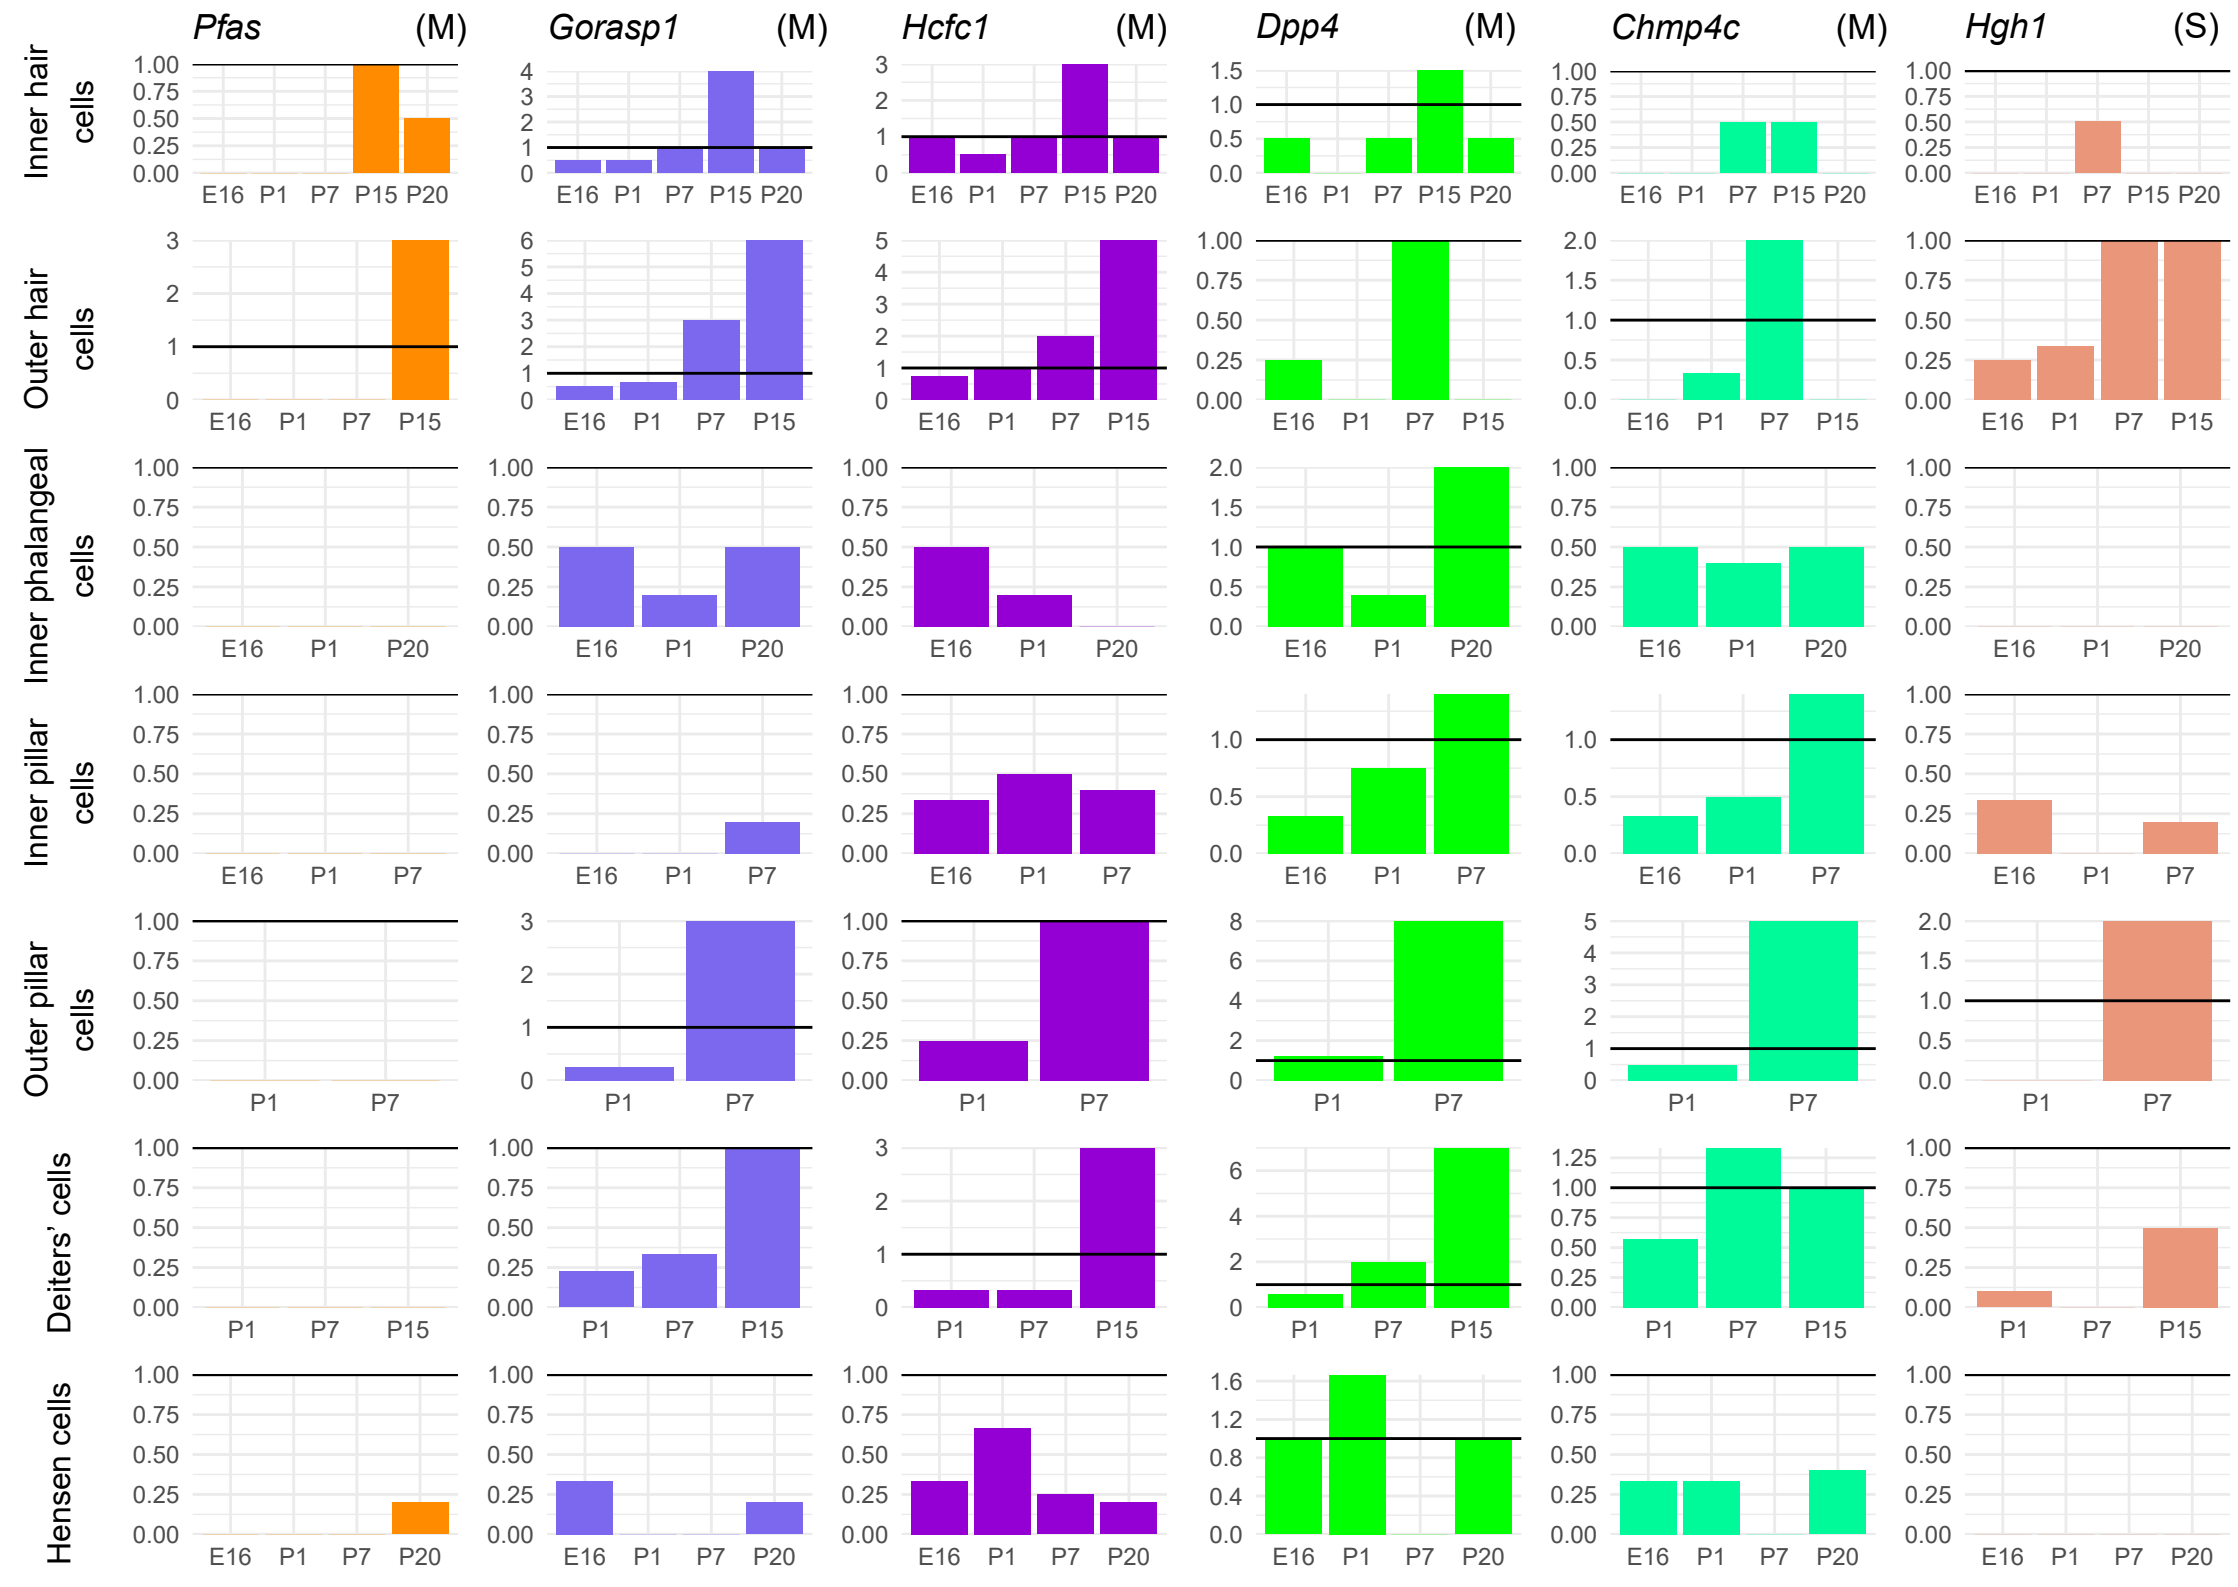

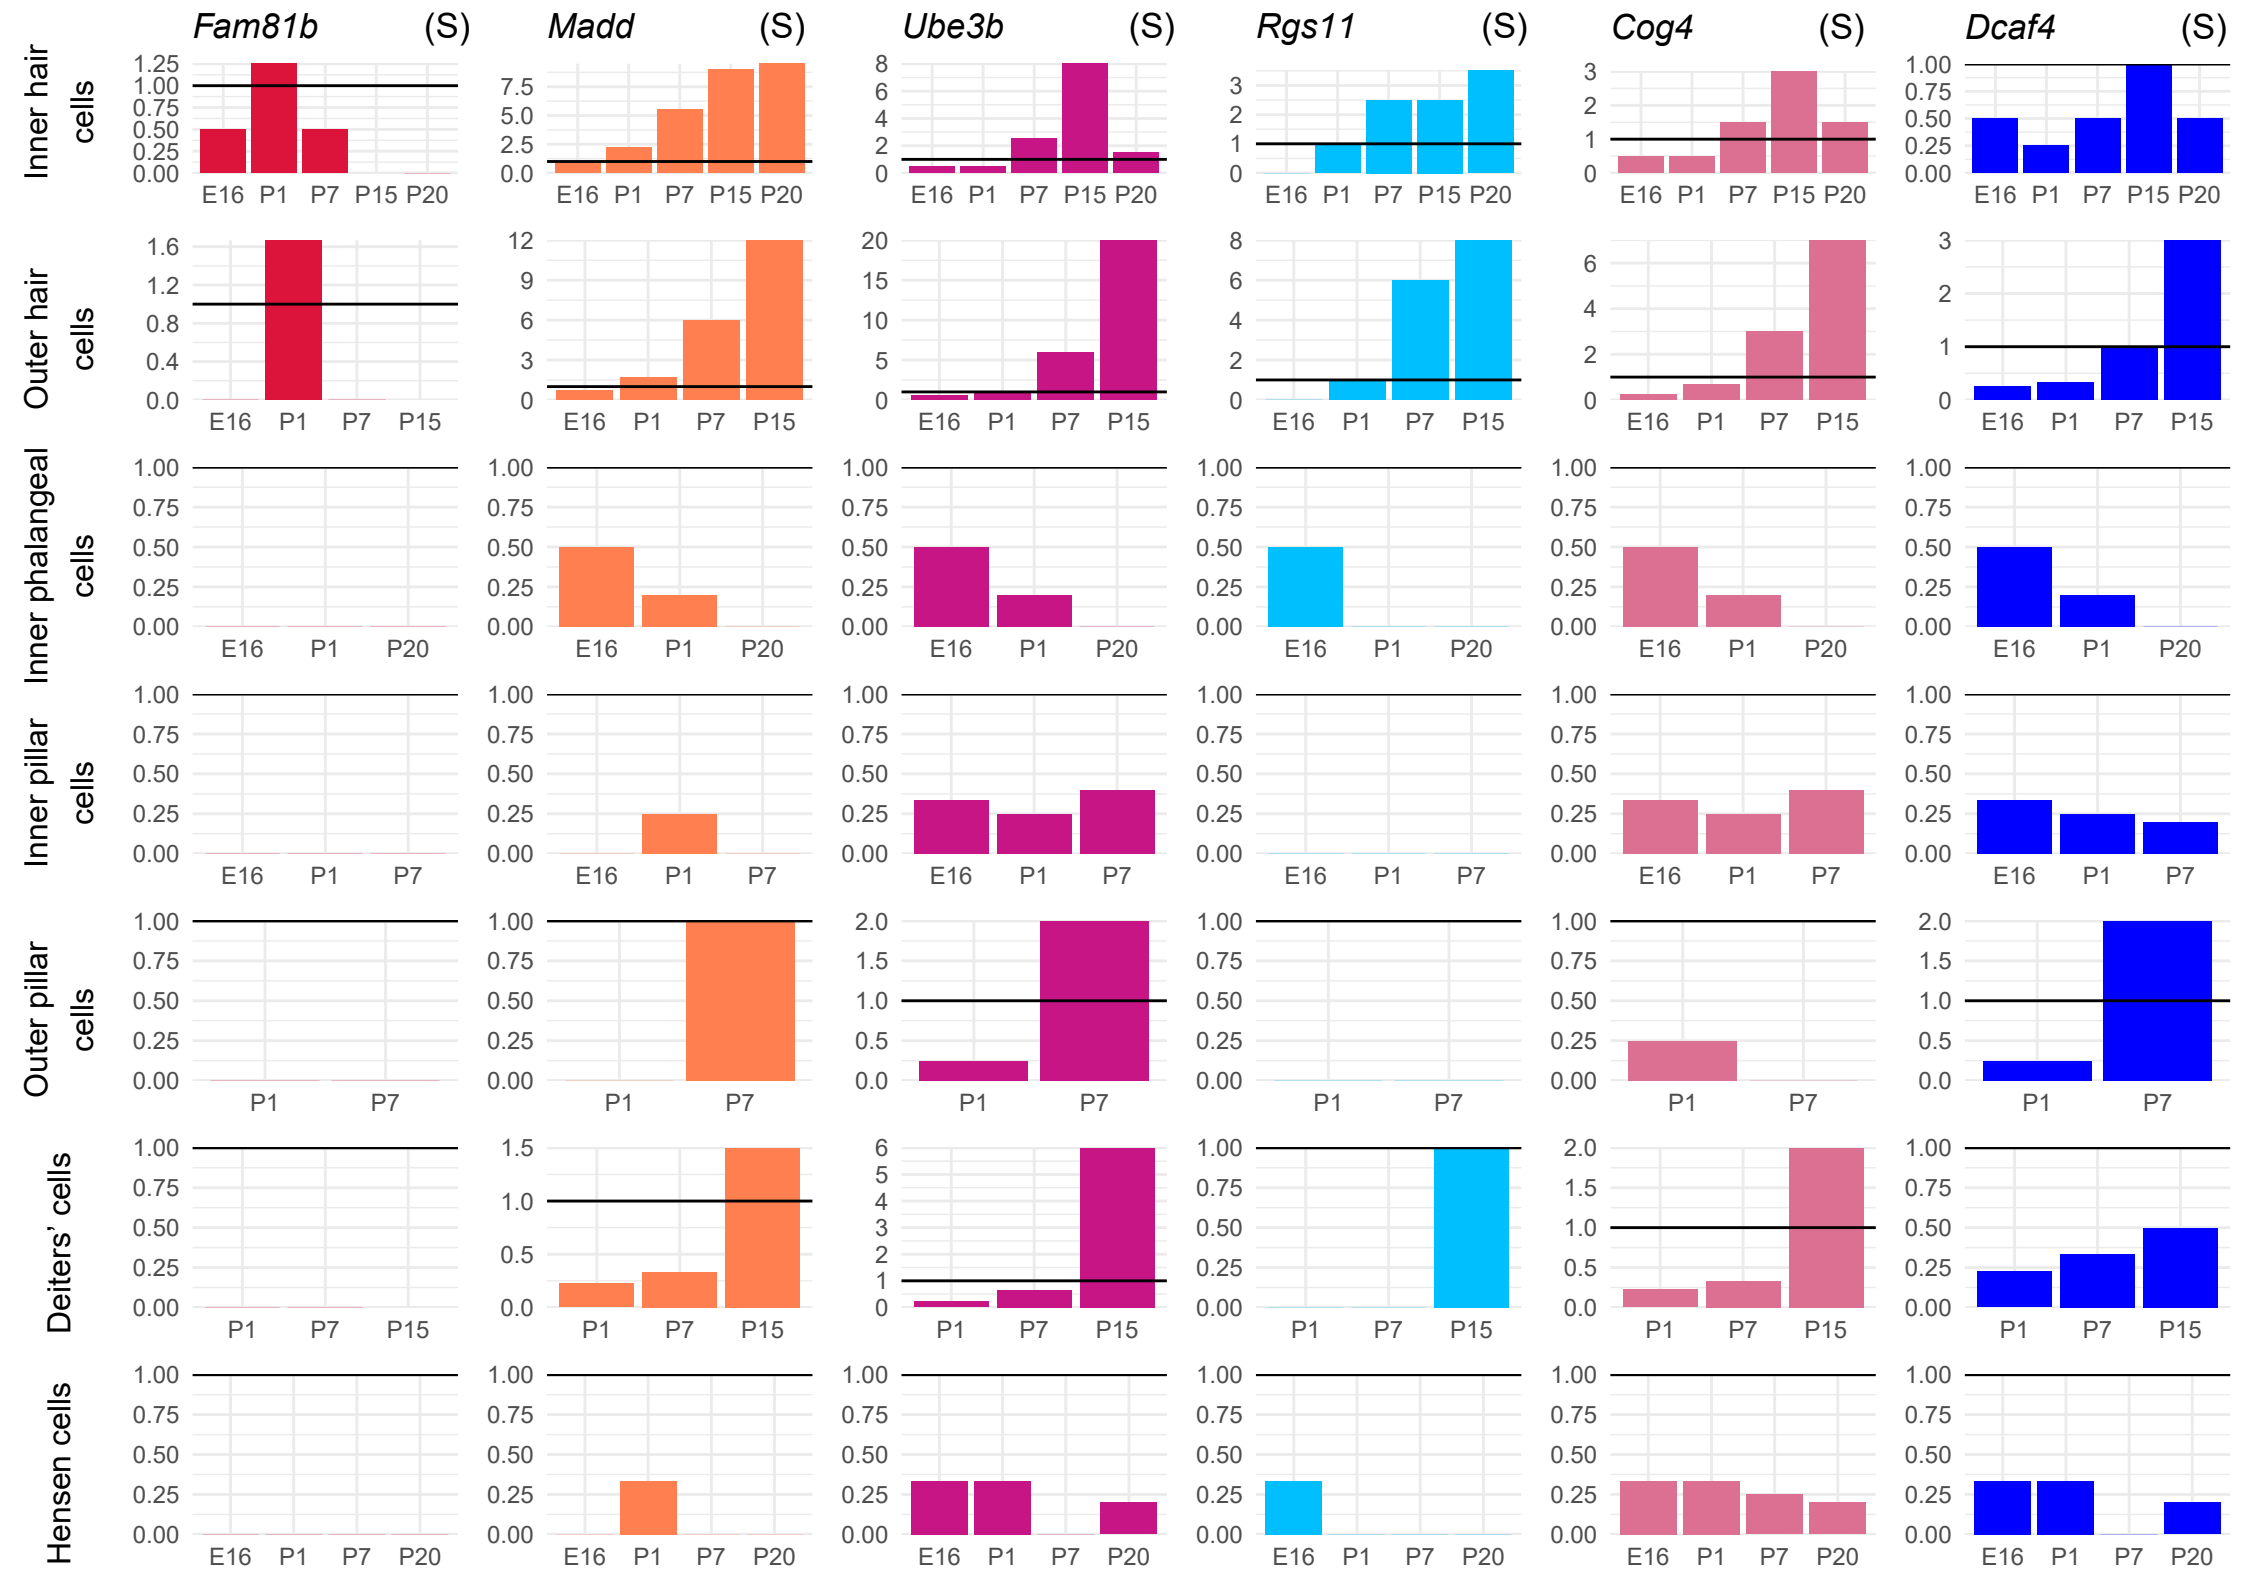



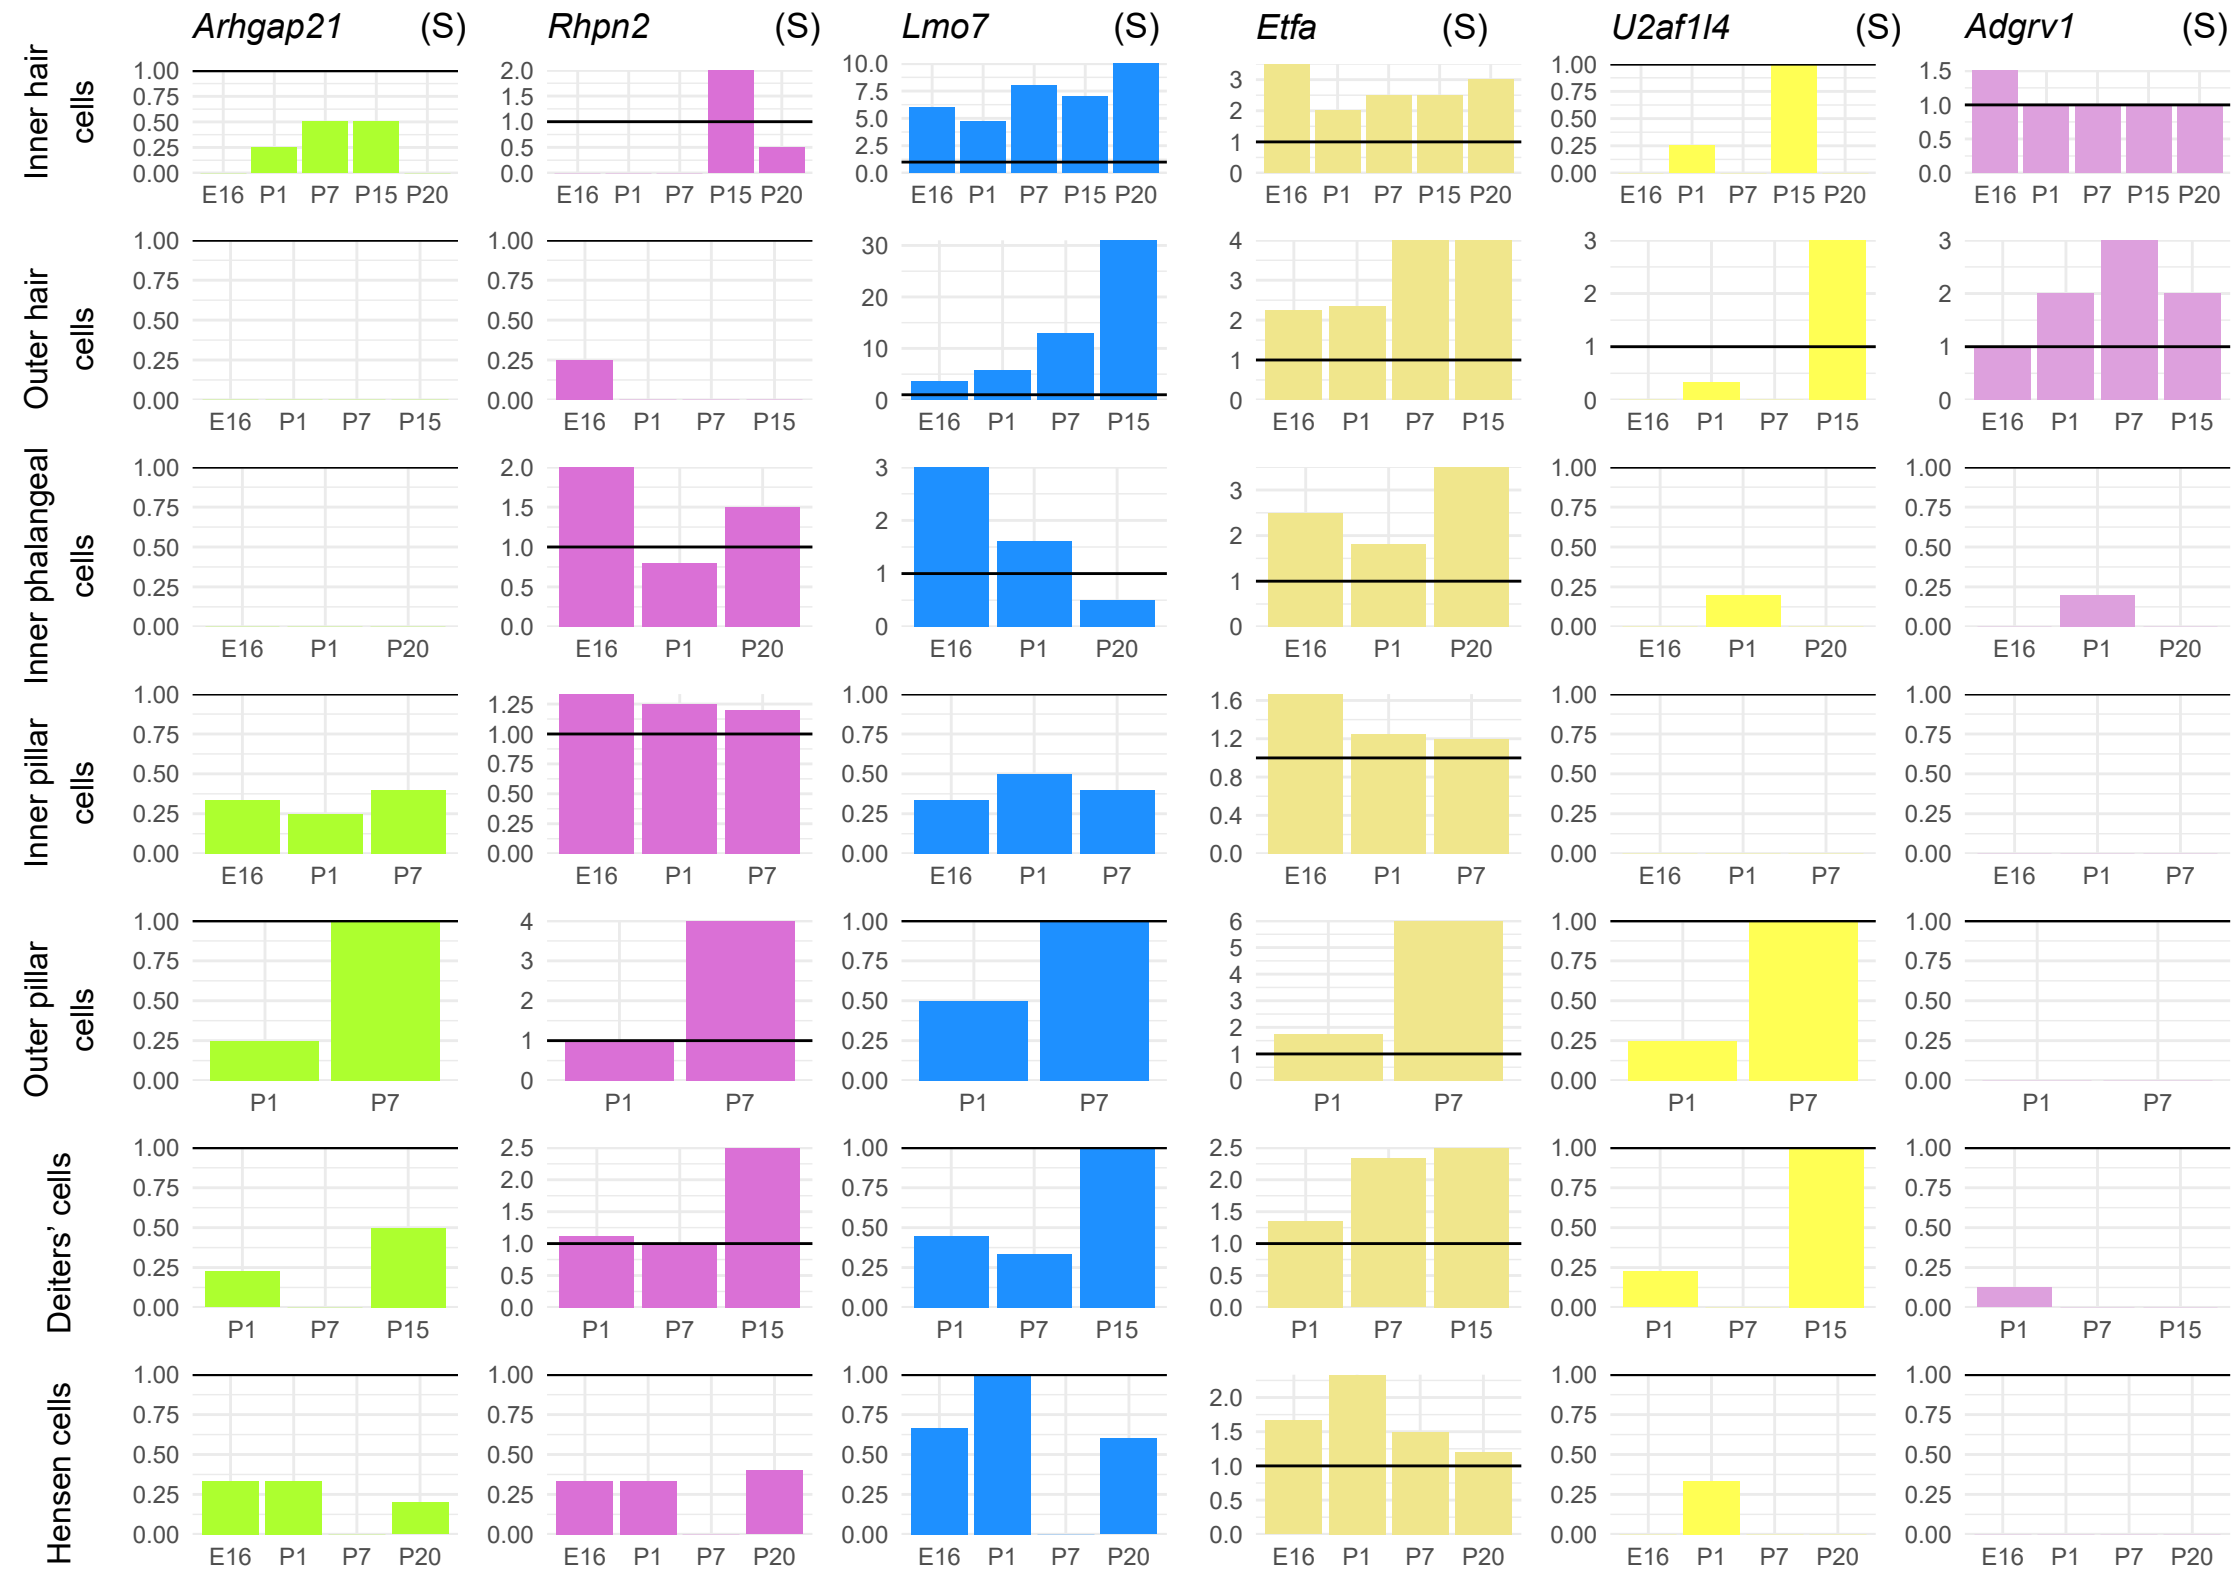

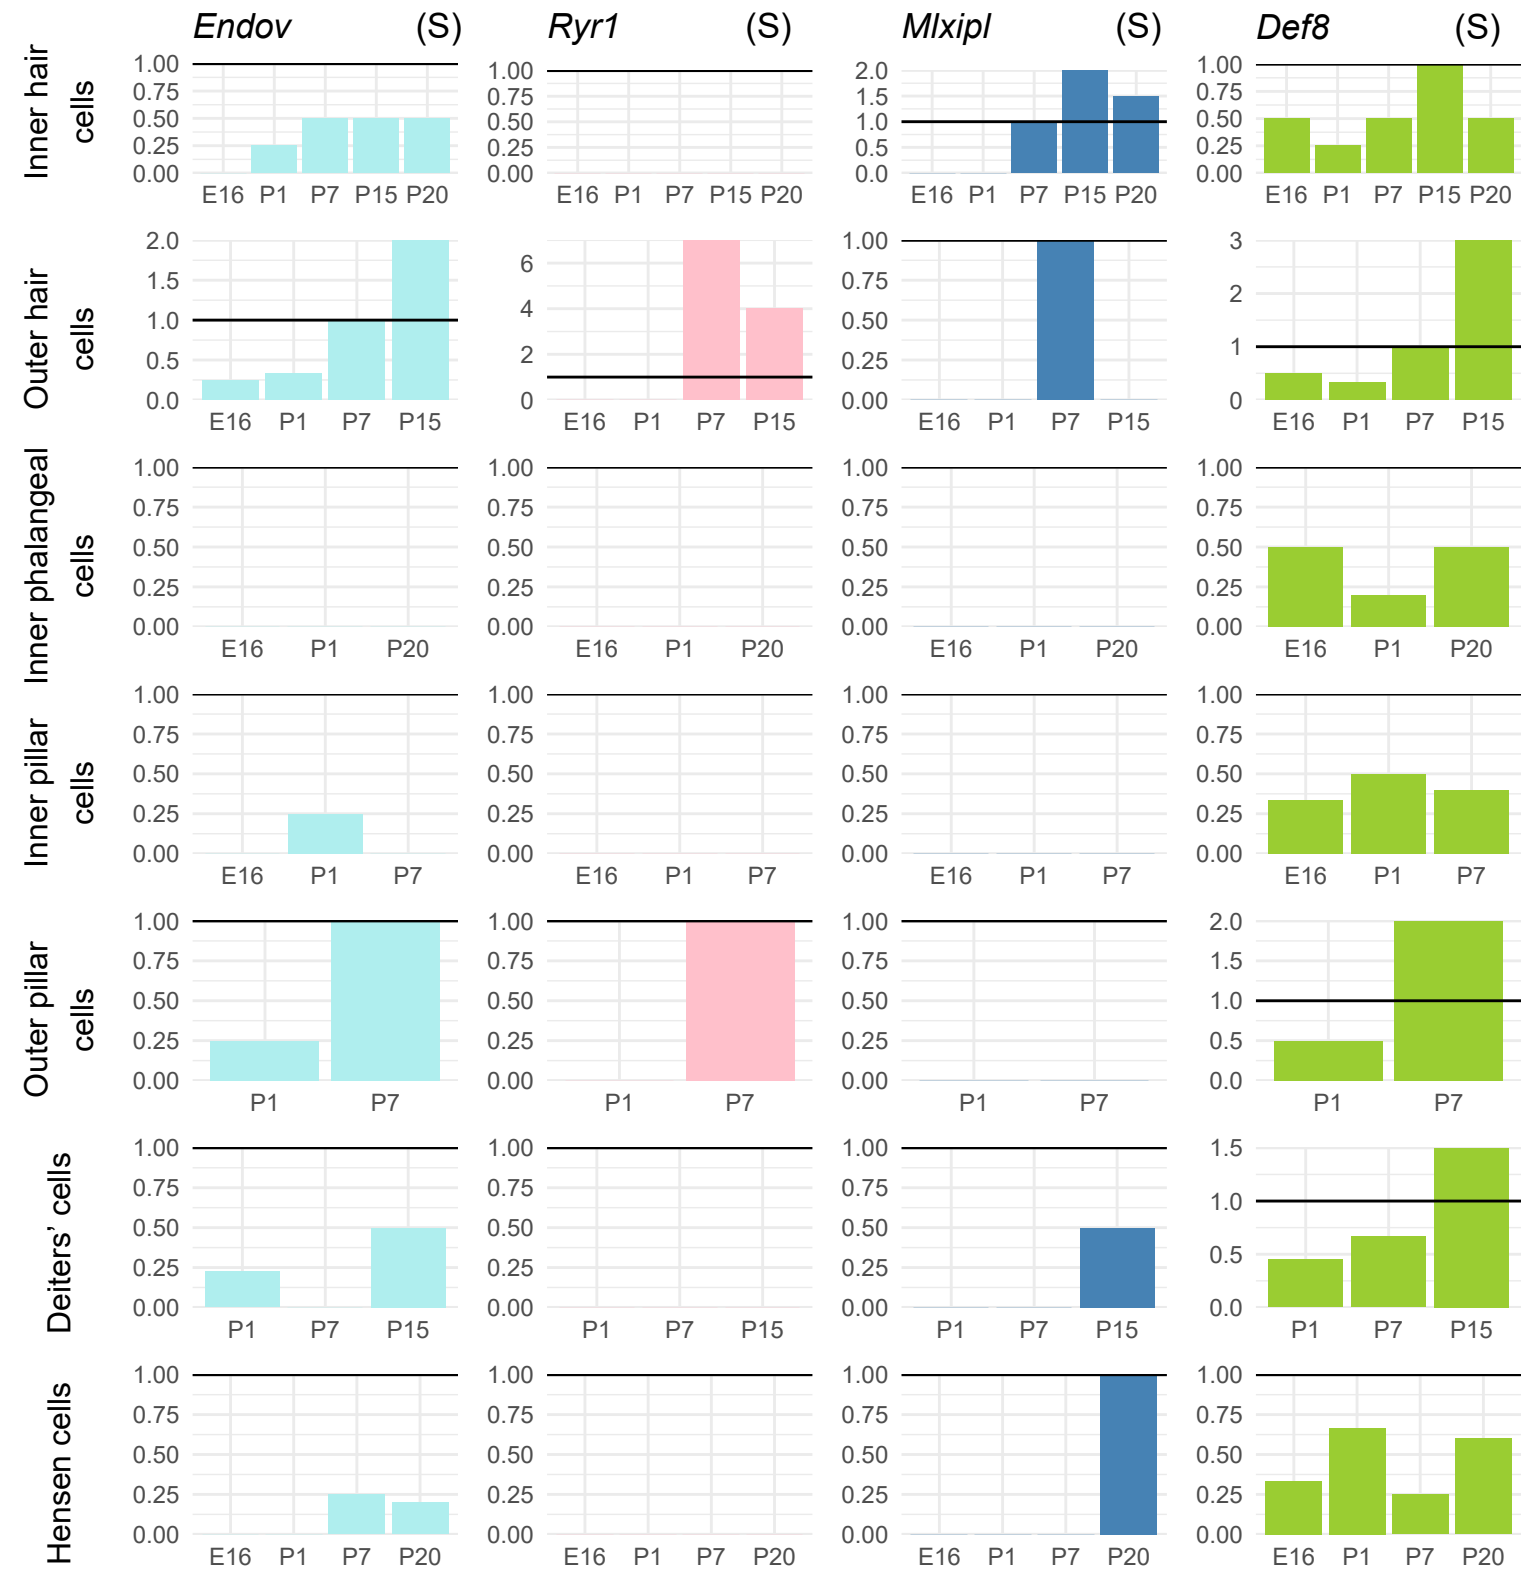

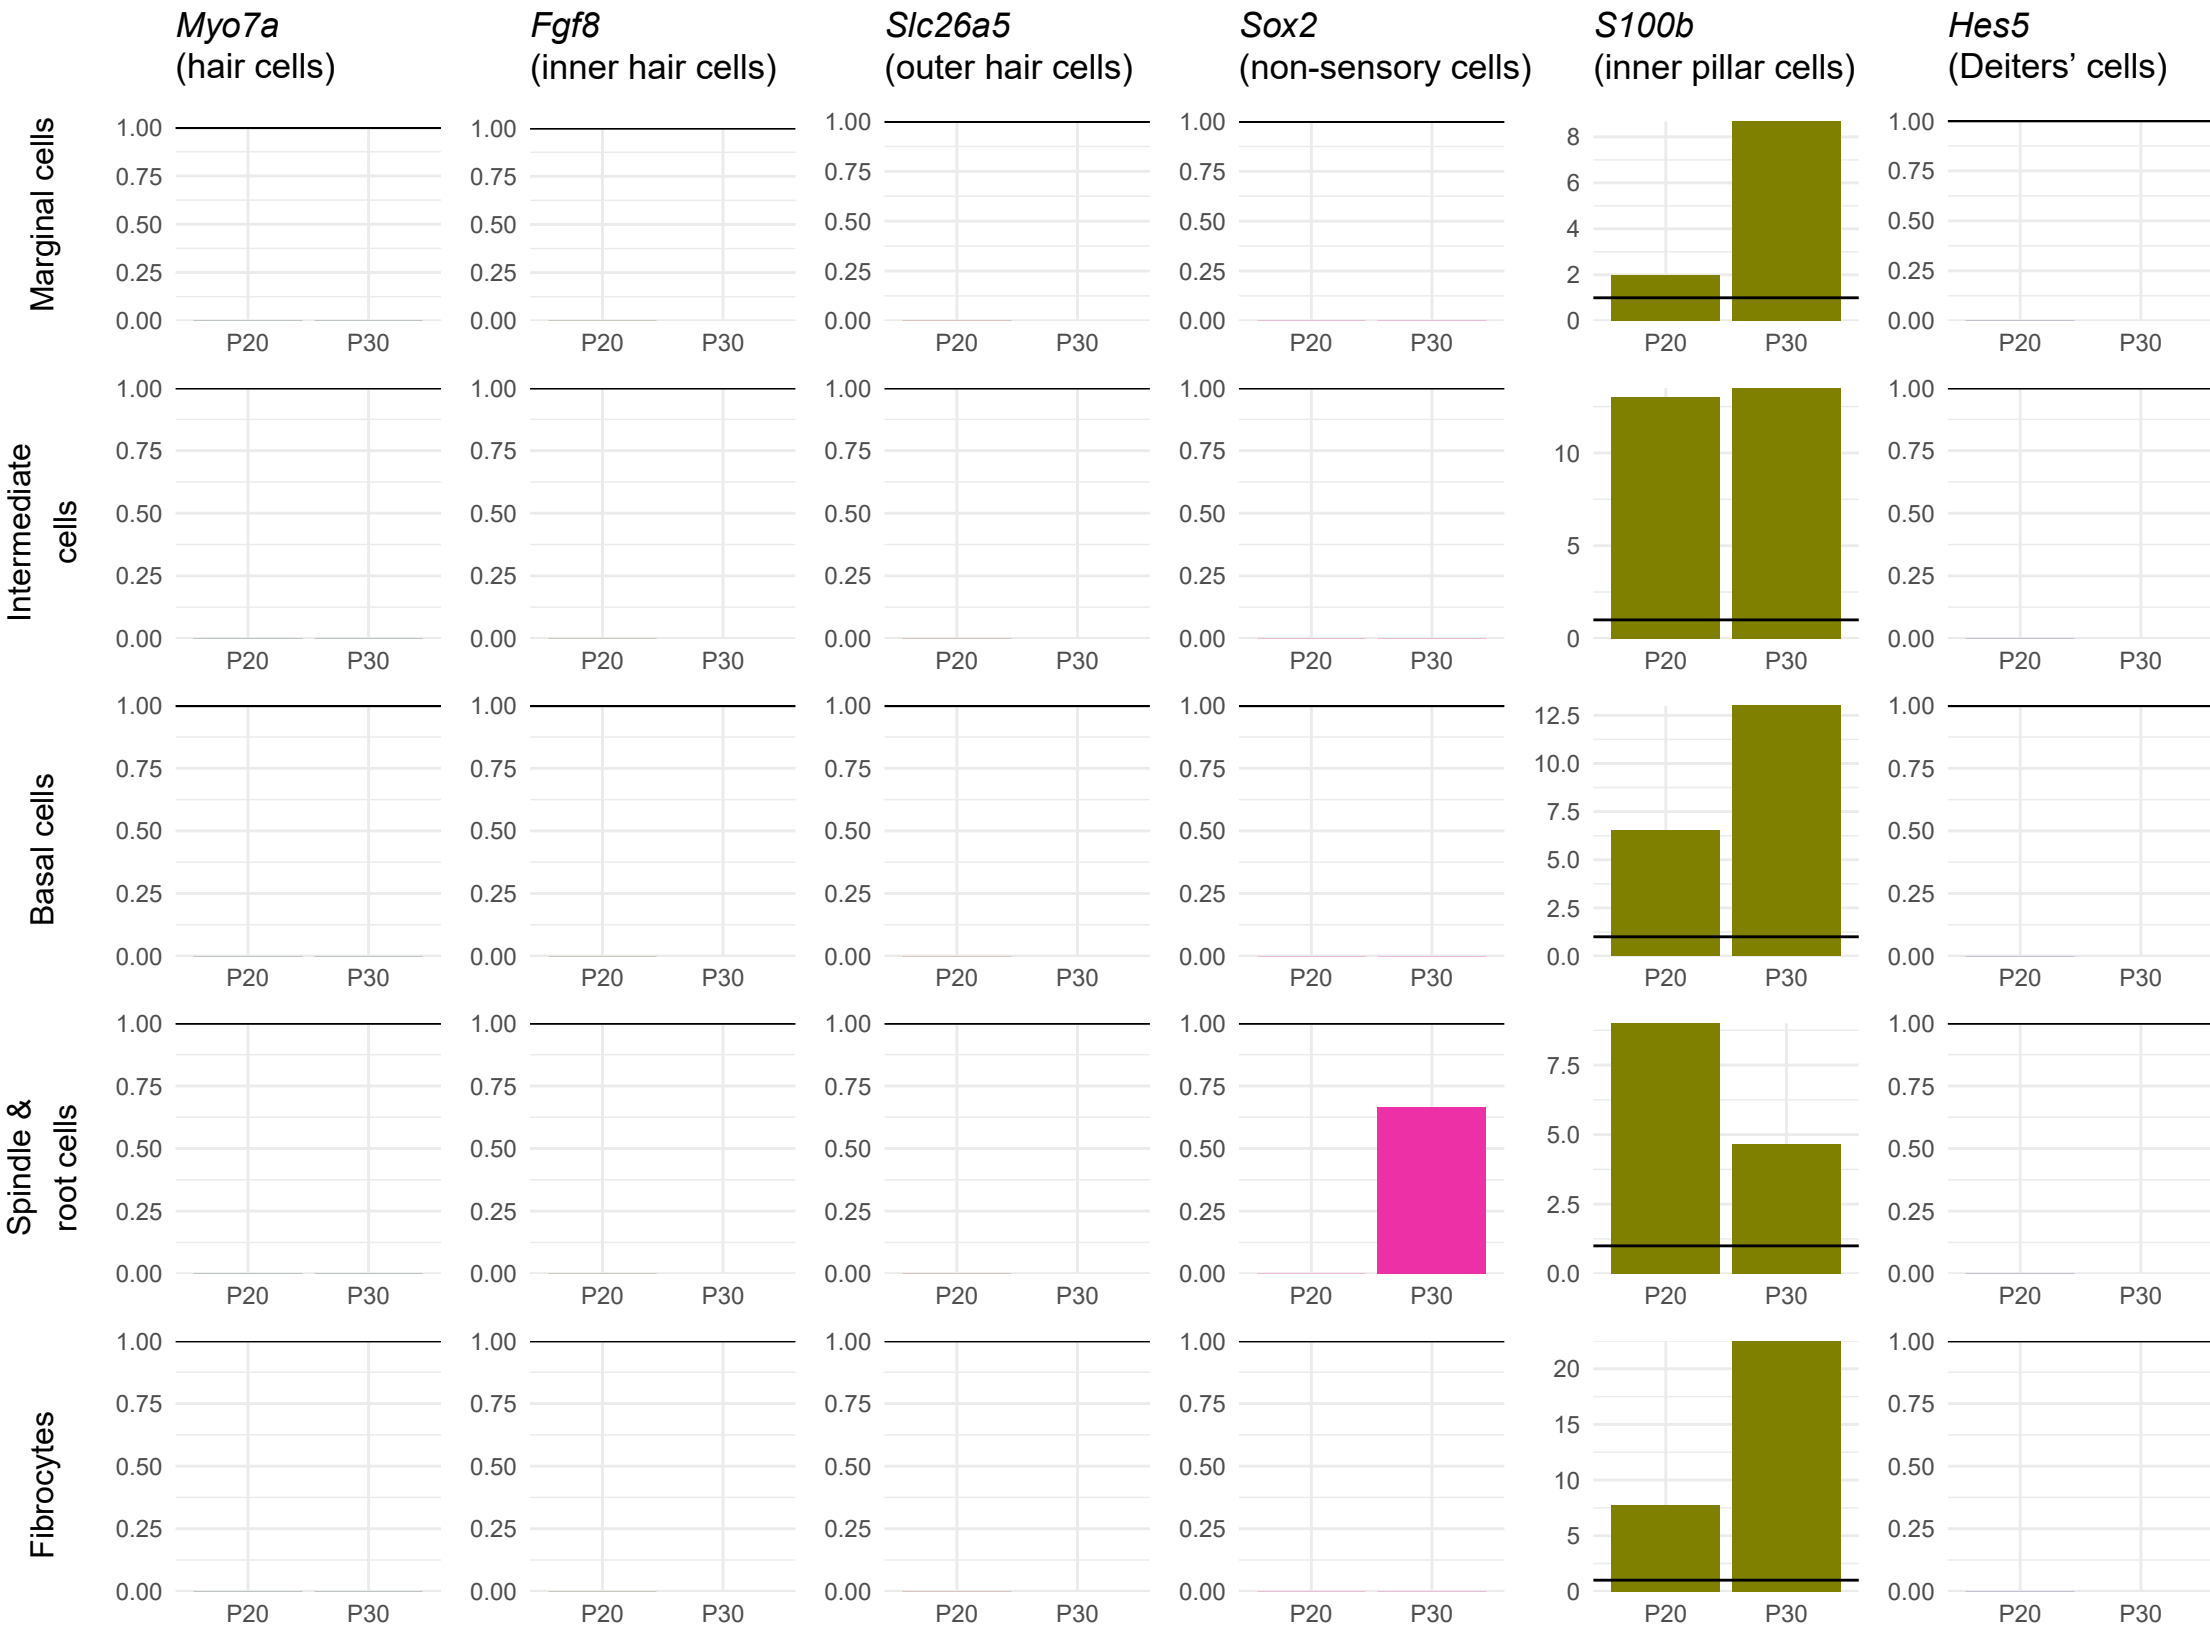

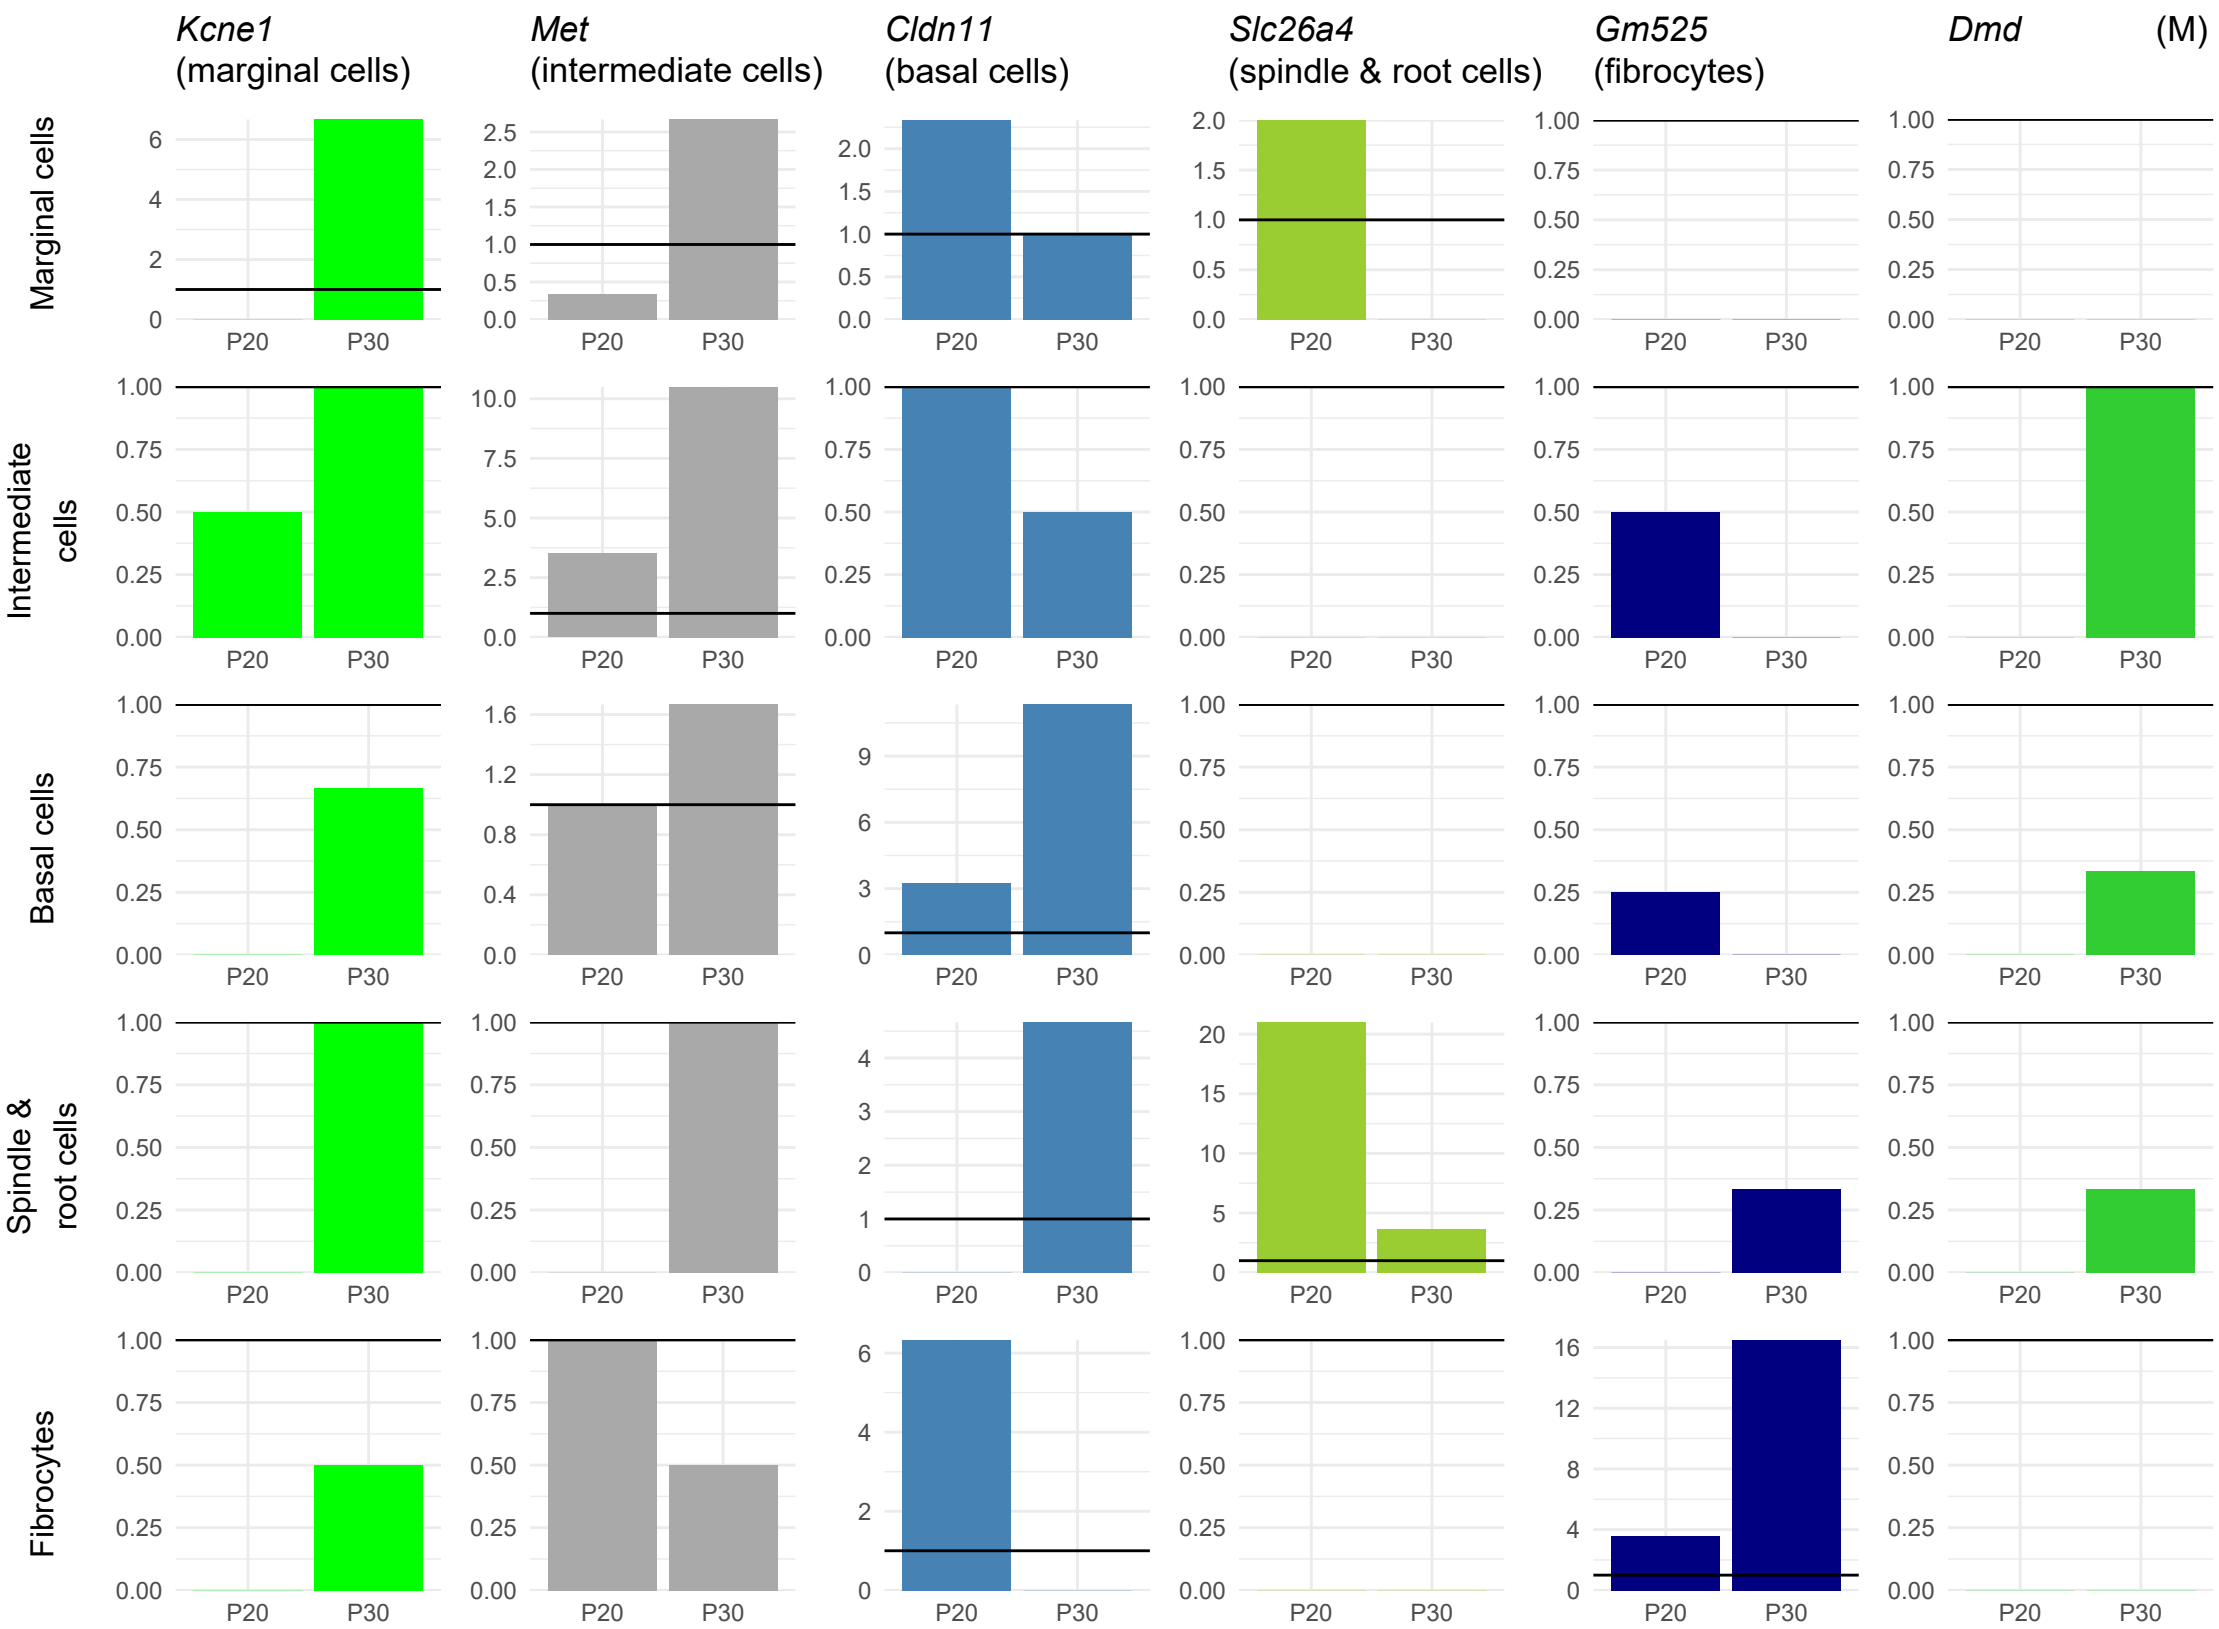

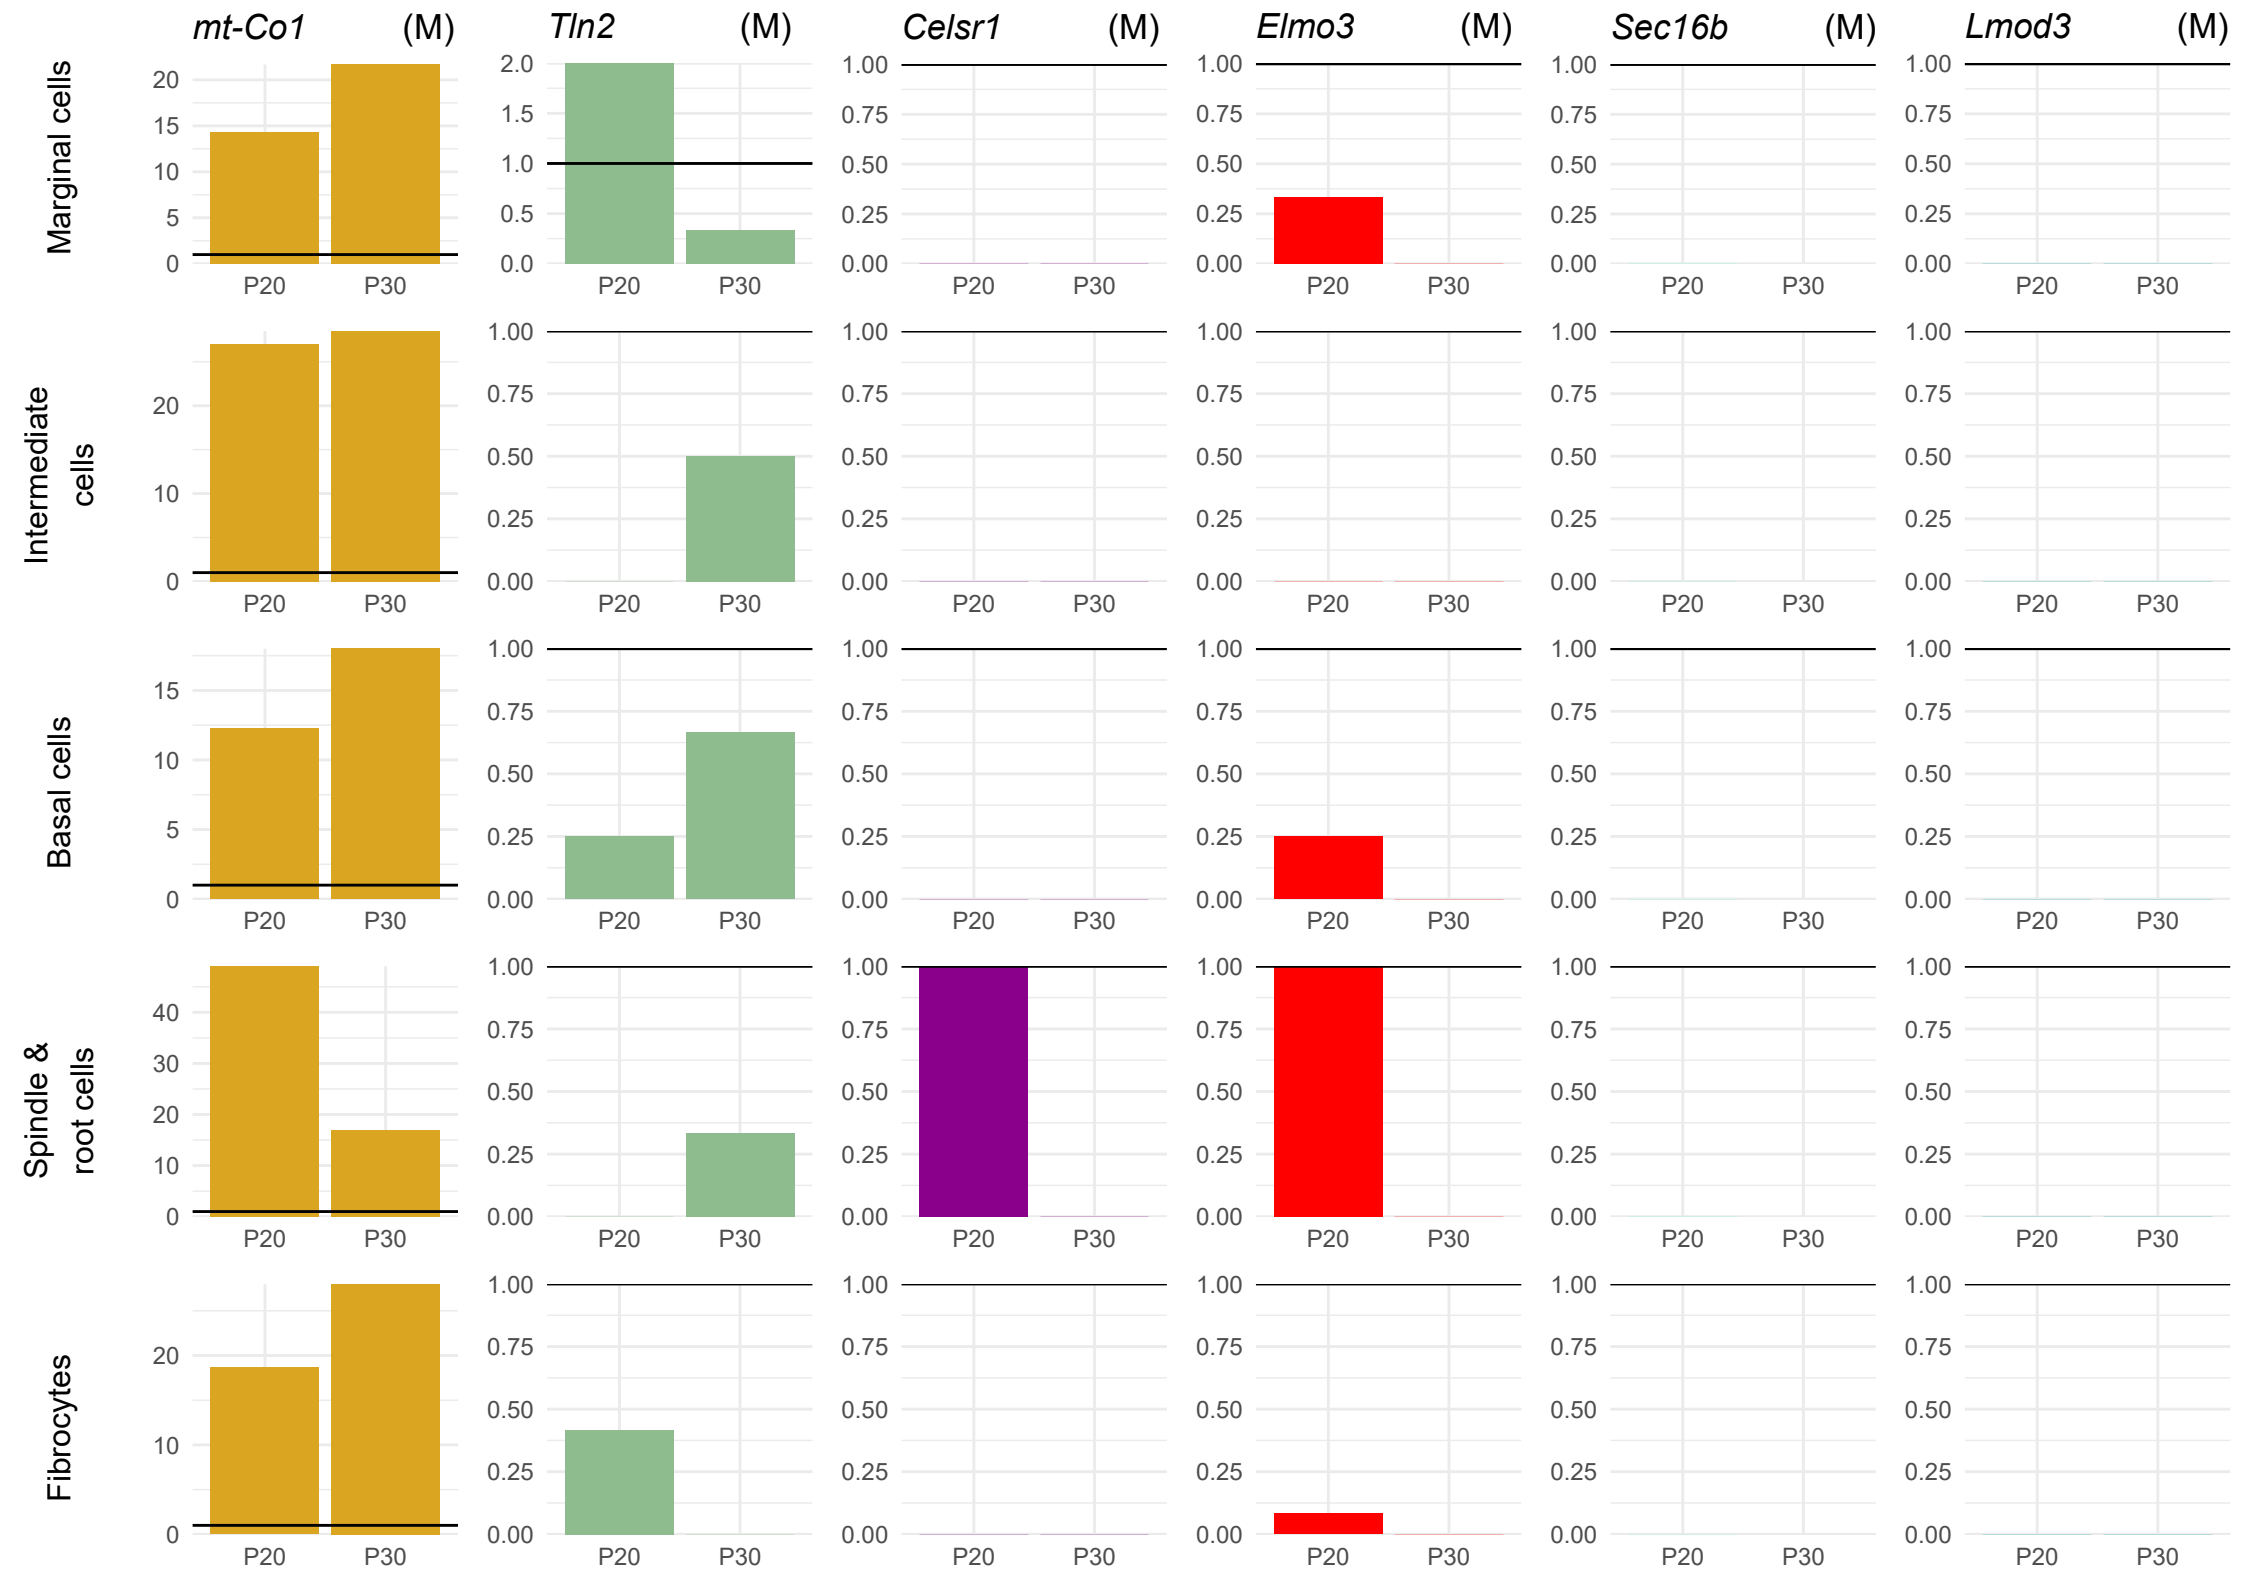

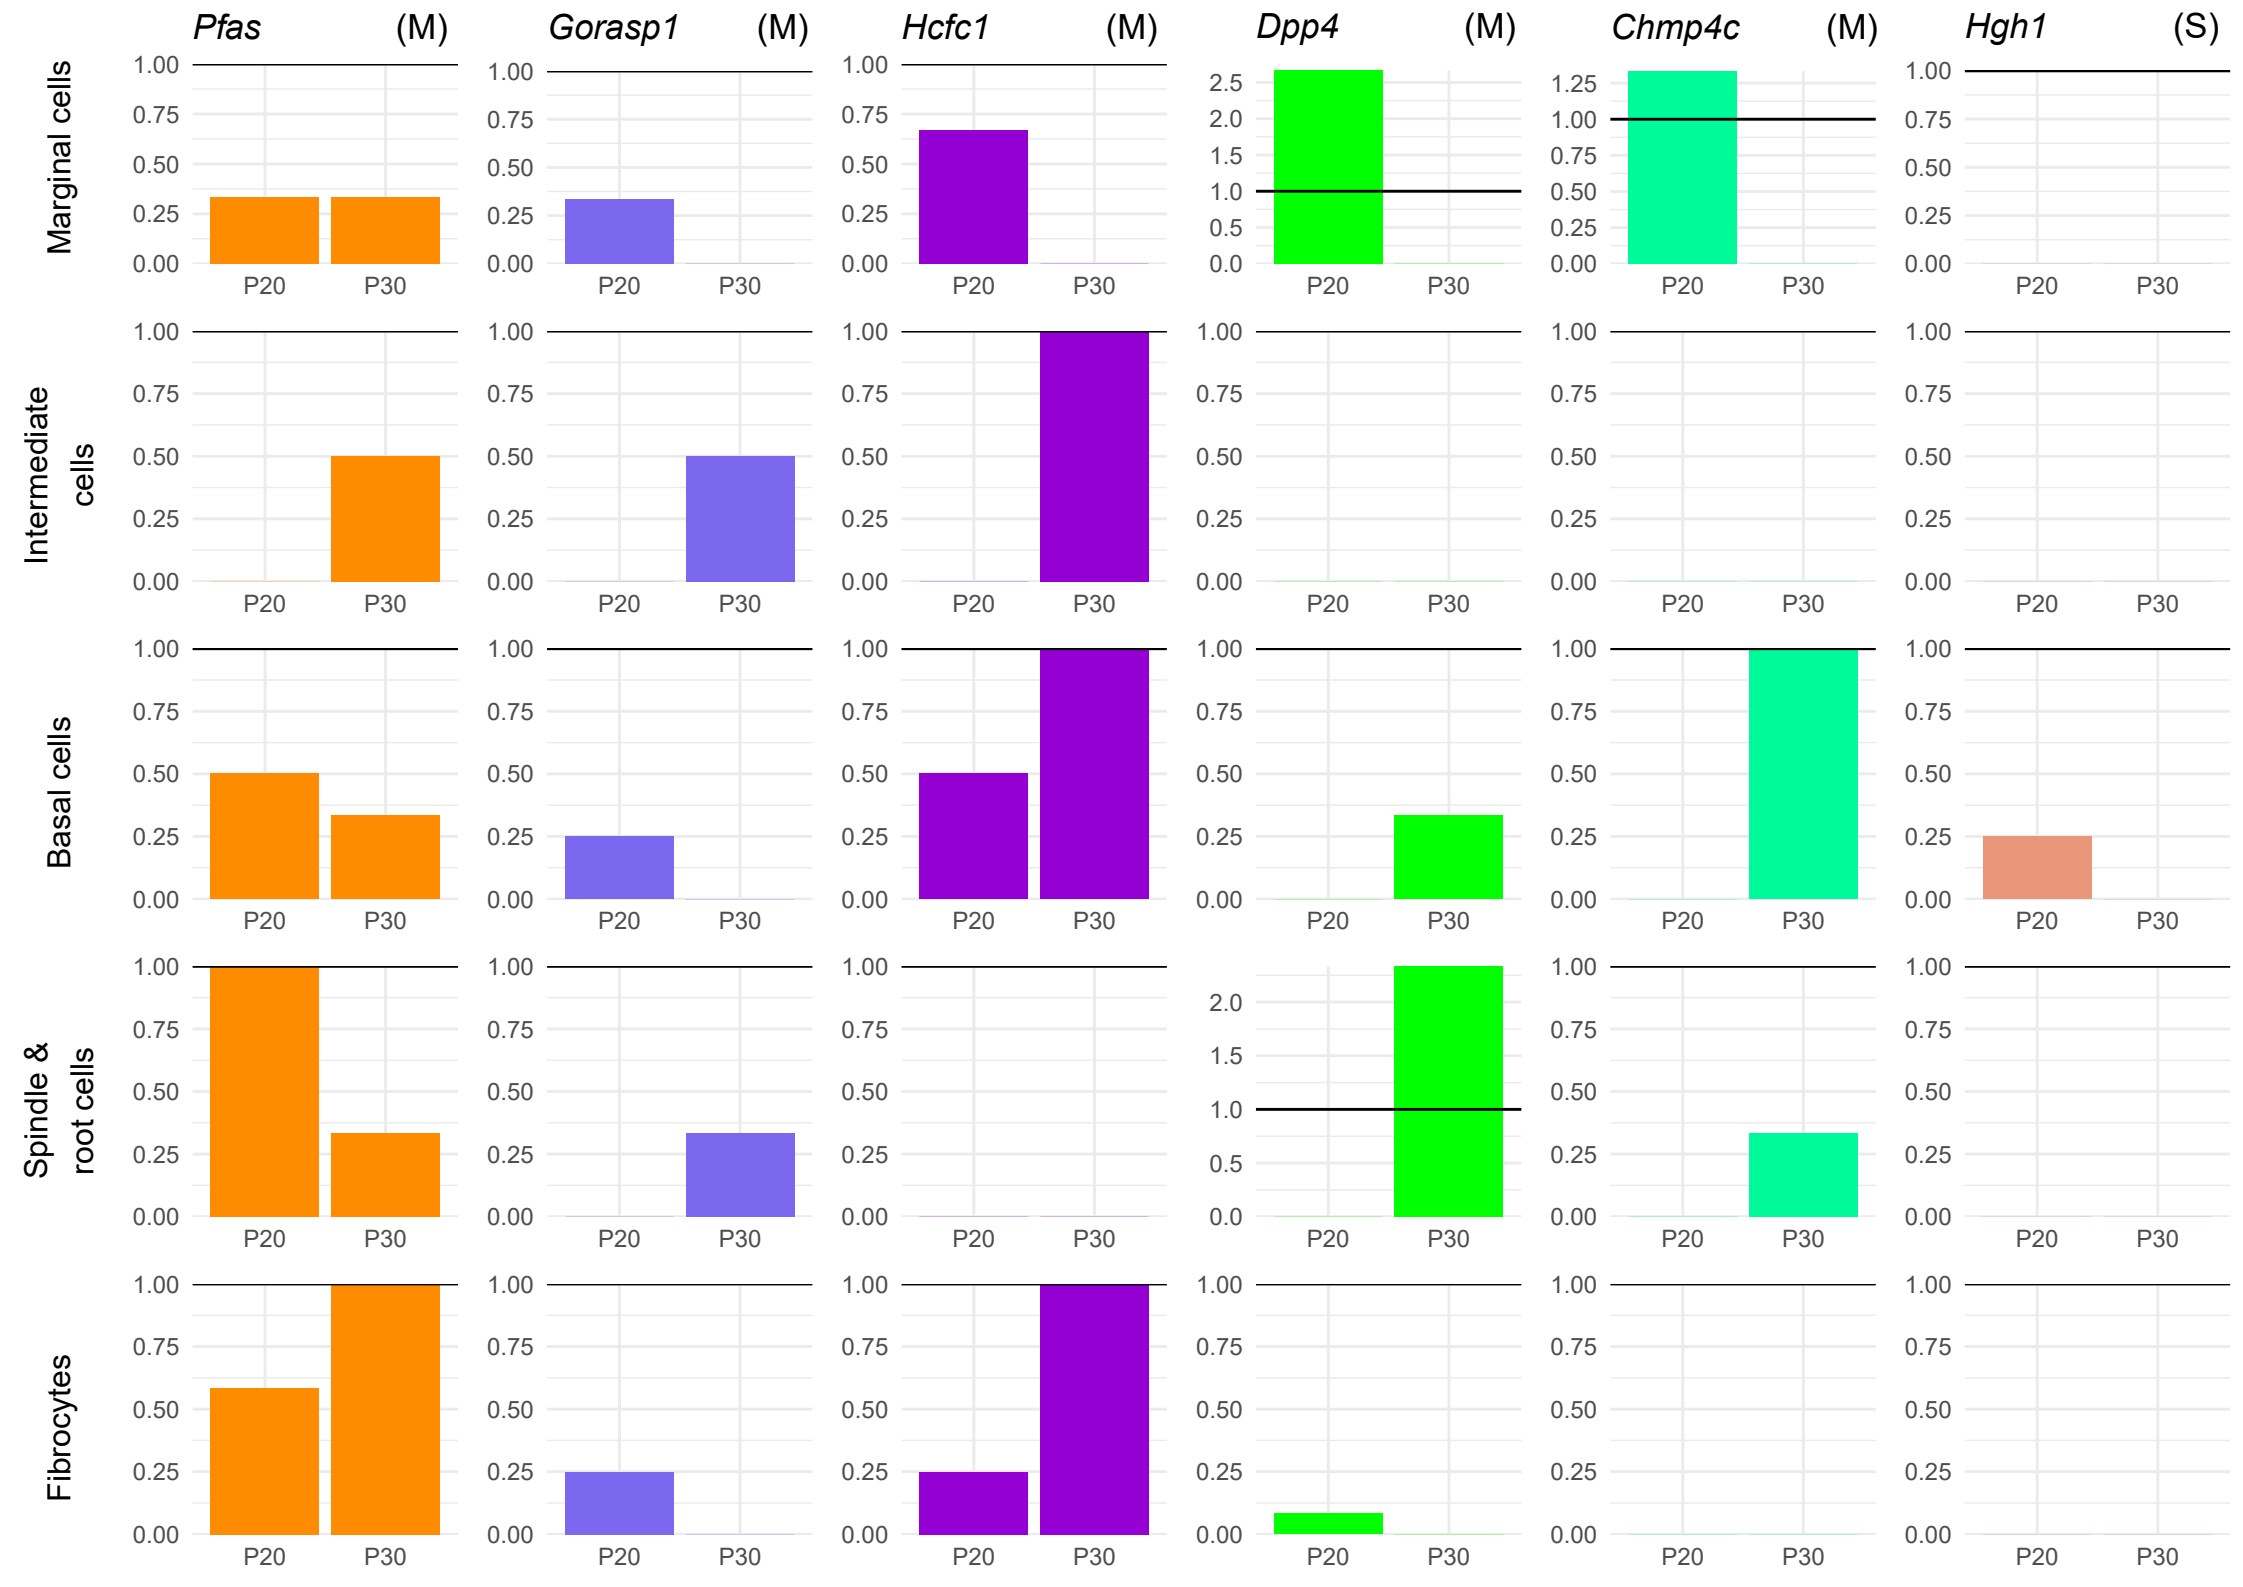

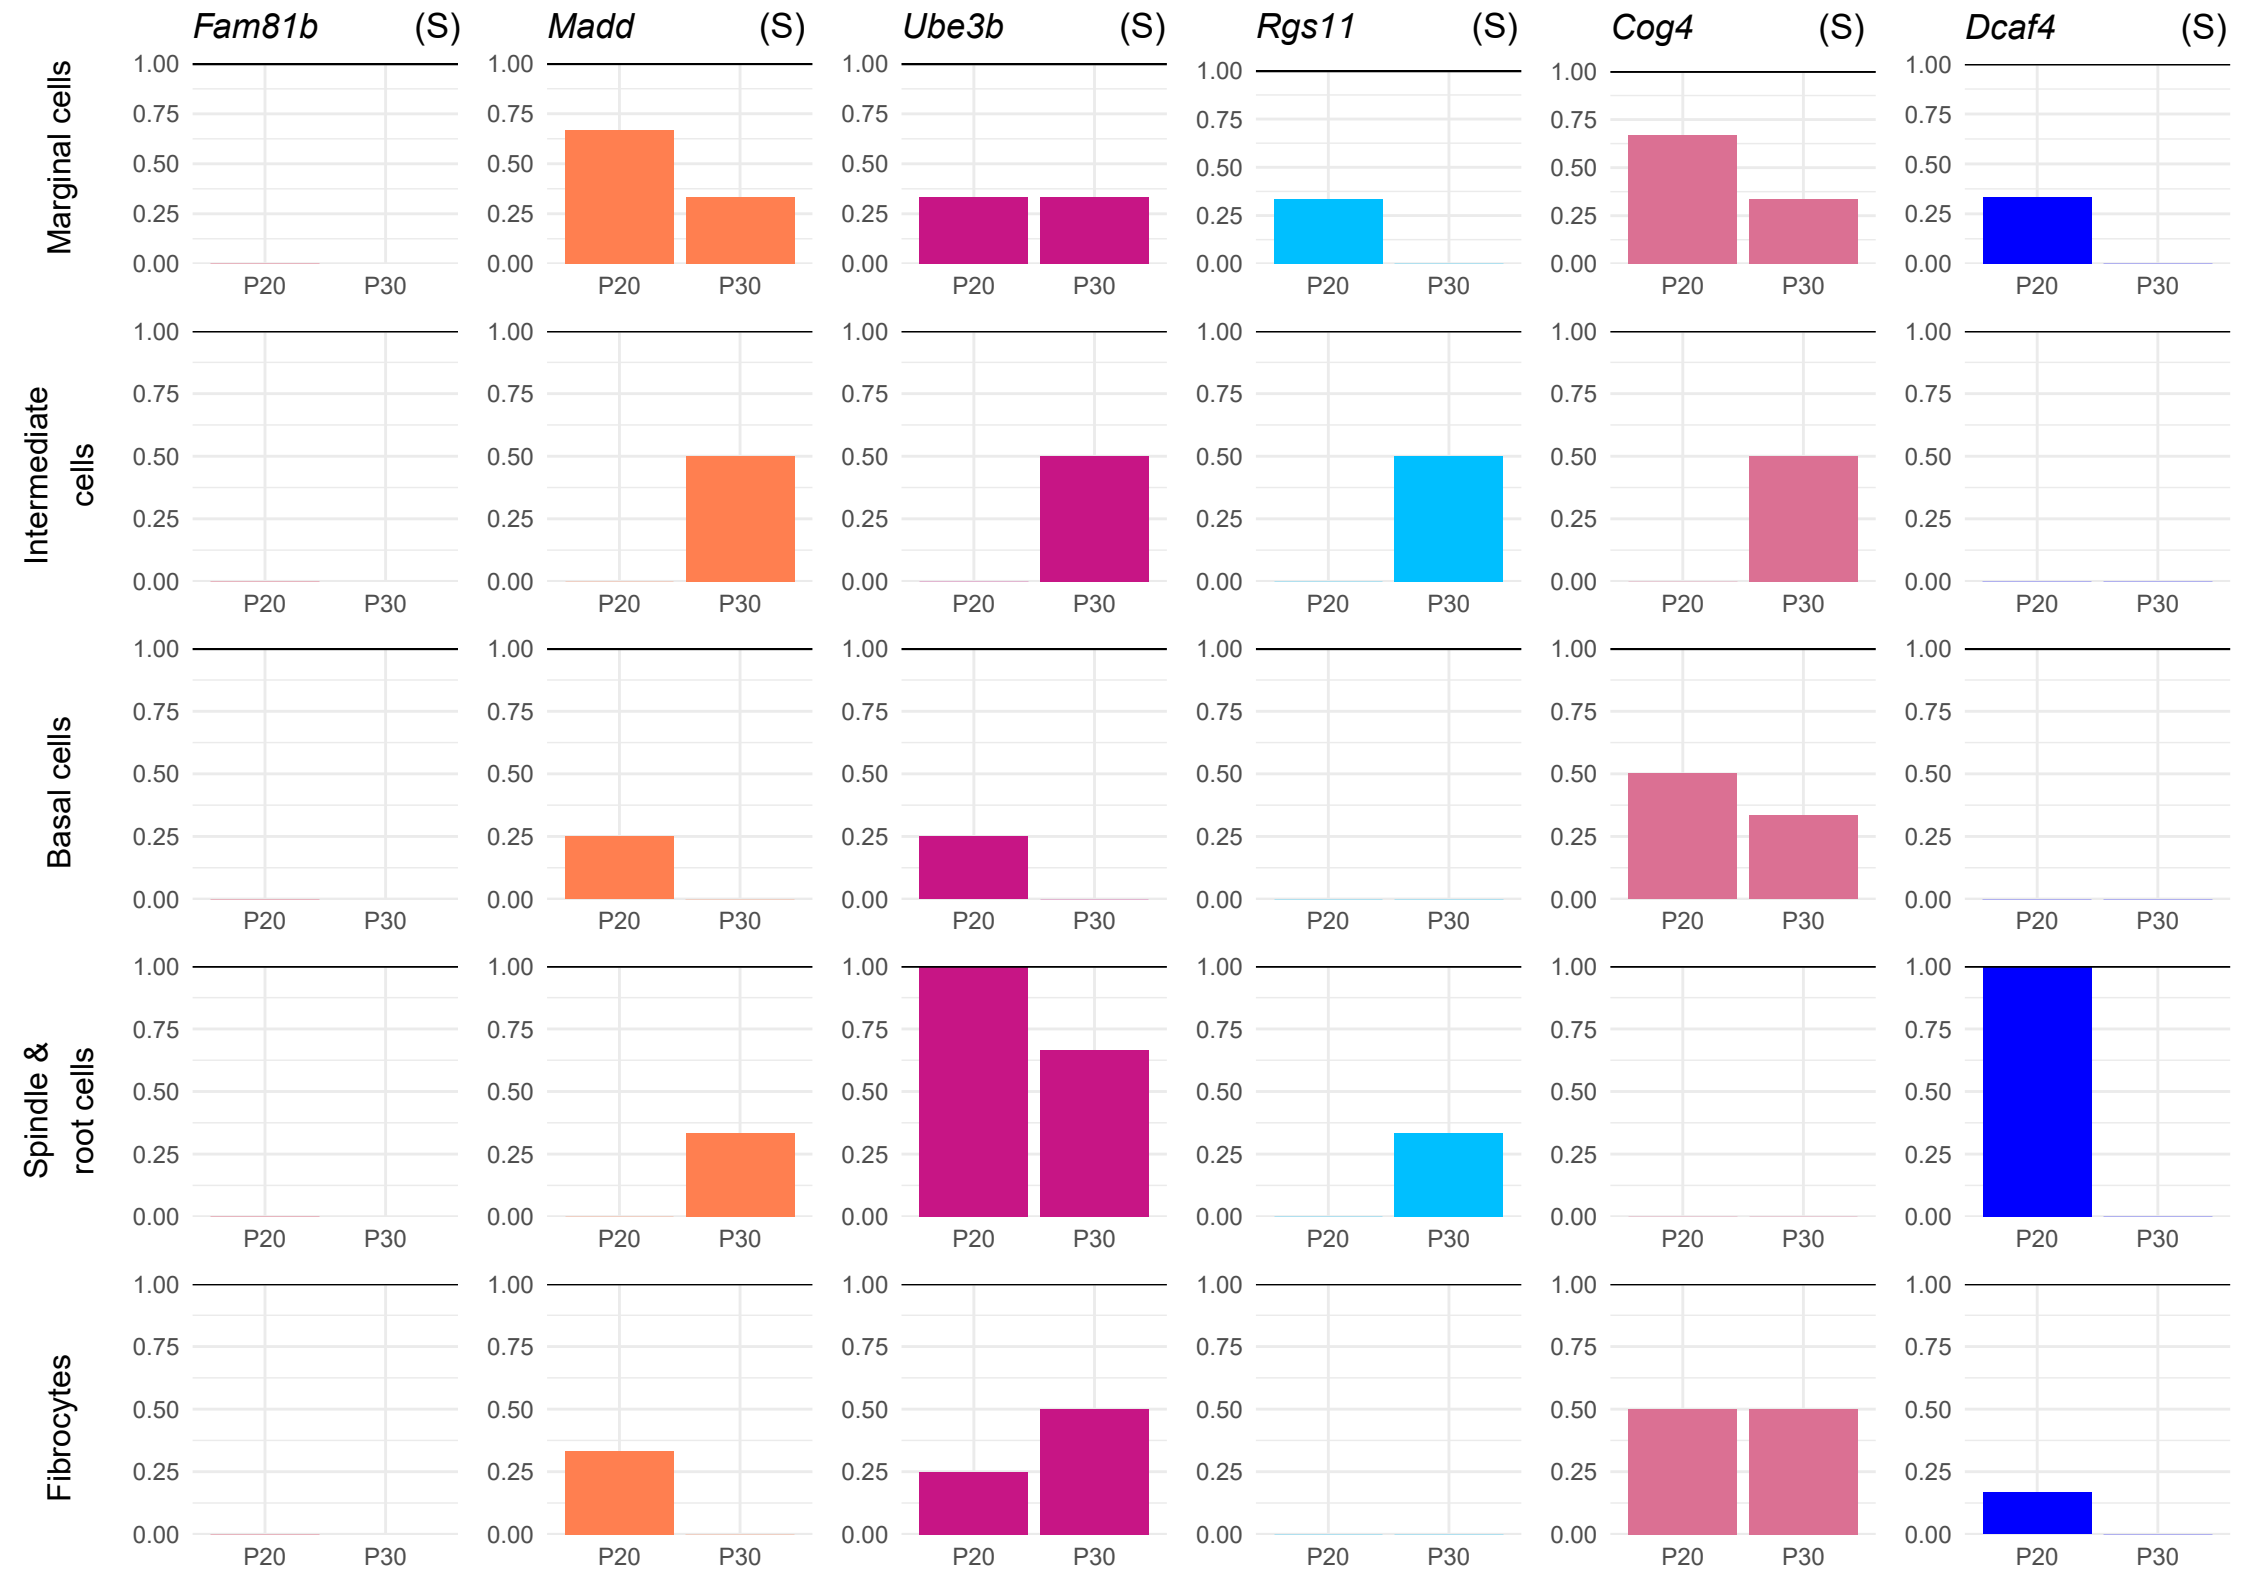

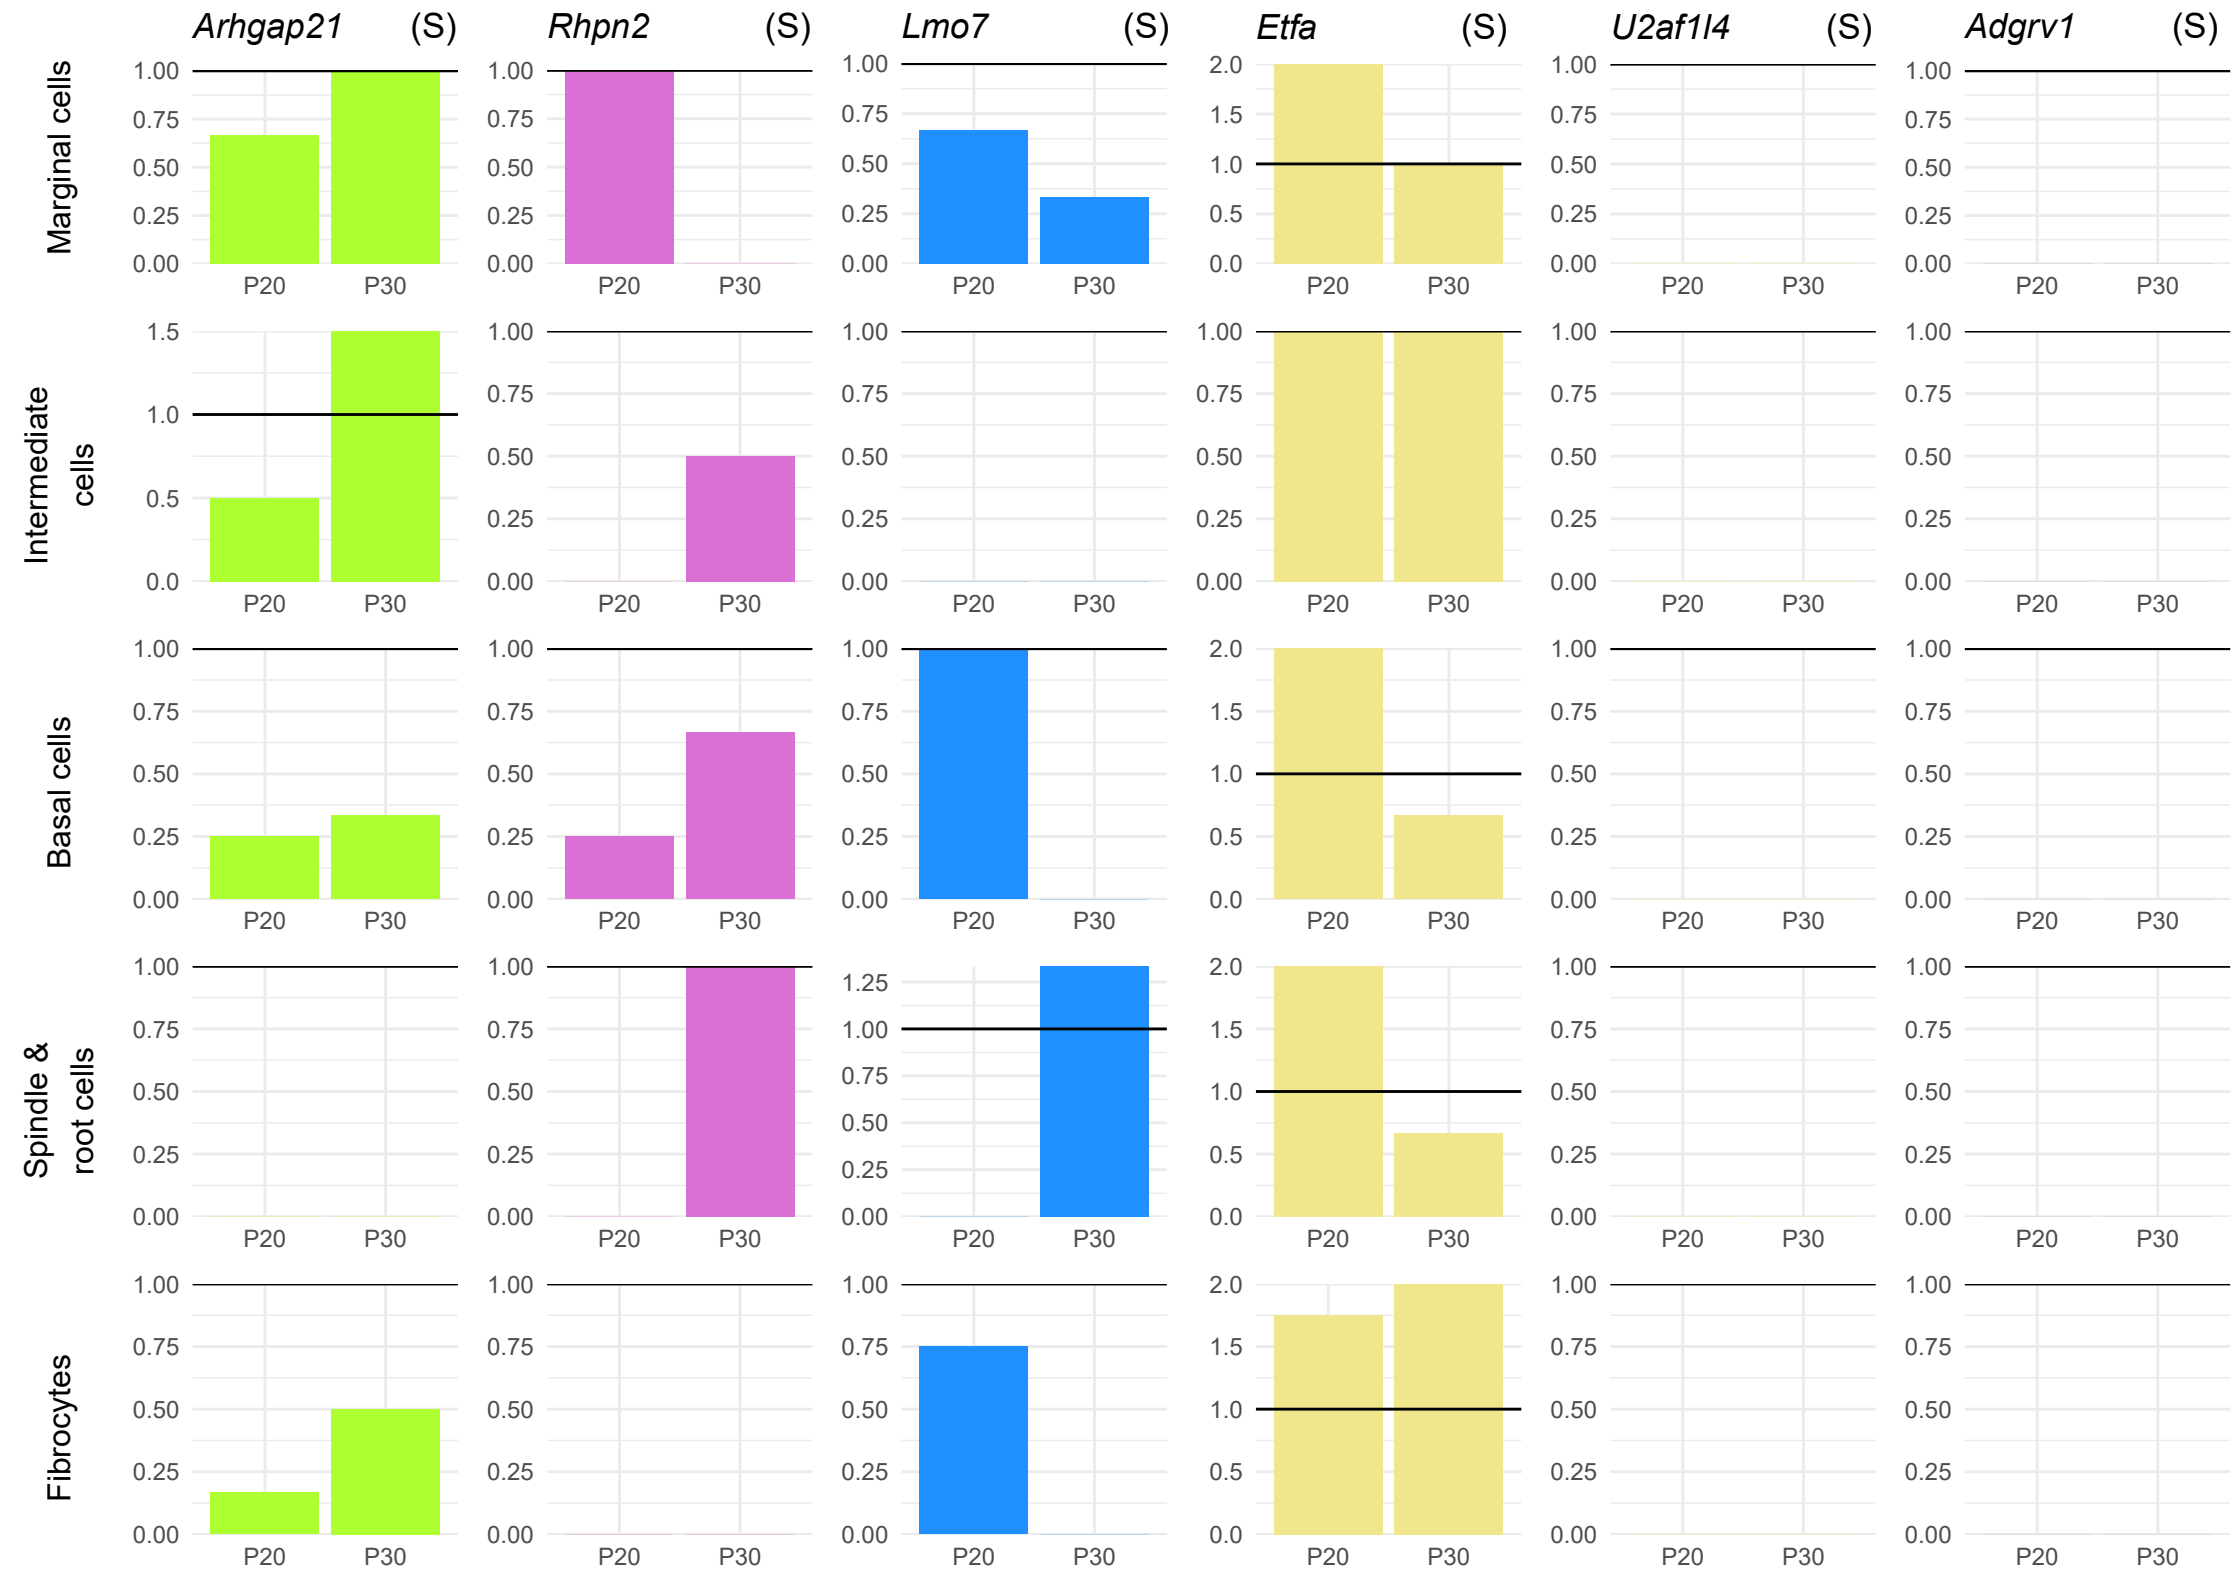



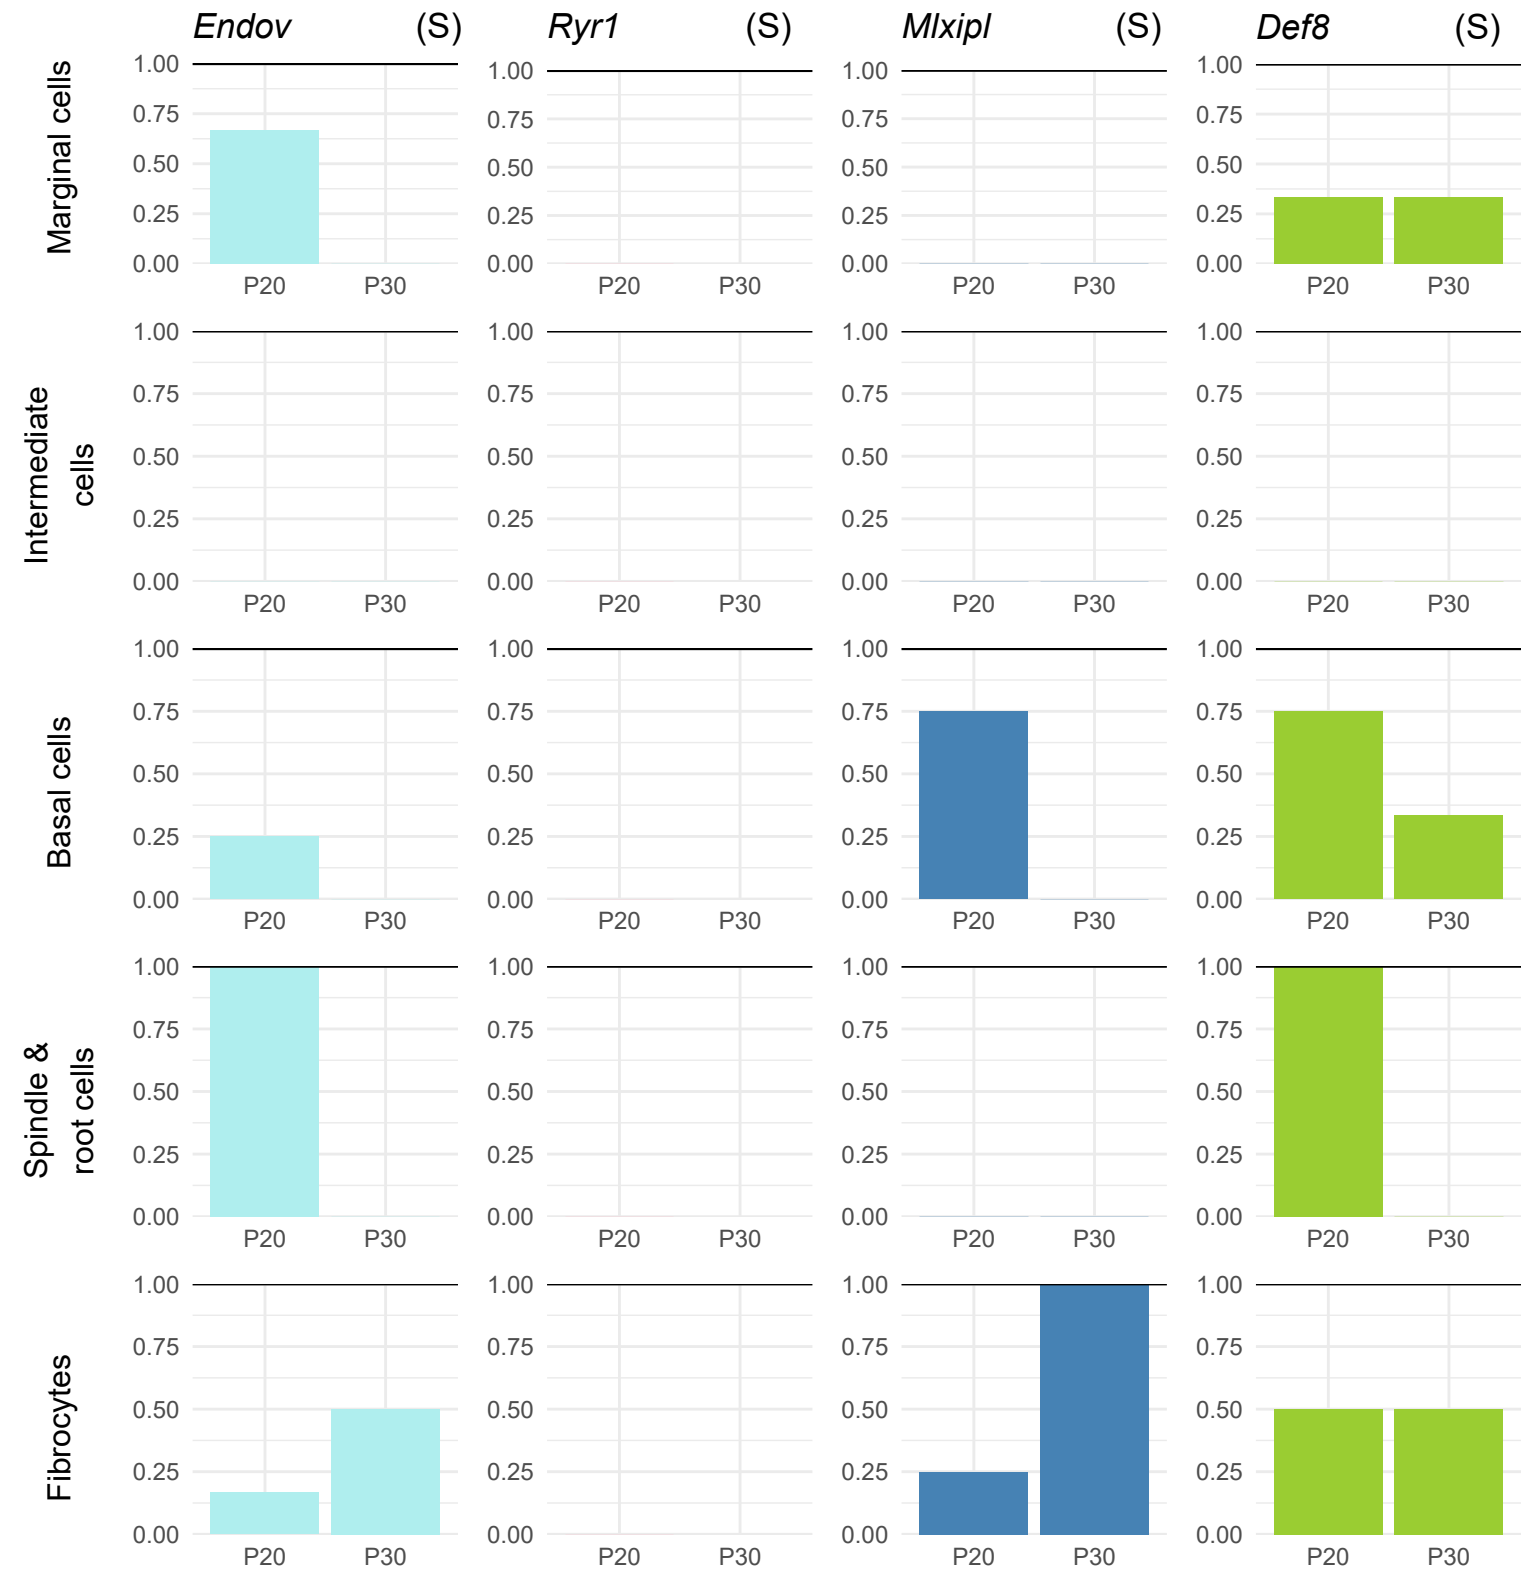

**Suppl. Figure 6.** Plots of gene expression in different cell types of the mouse inner ear, from single cell RNAseq data. These are genes linked only to phenotypic subtypes in this study (M = Metabolic, S = Sensory). Expression was normalised to *Hprt* (represented by a horizontal line at  $y=1$  on each plot). Marker genes have been included for comparison (*Myo7a* (hair cells), *Fgf8* (inner hair cells), *Slc26a5* (outer hair cells), *Sox2* (non-sensory cells), *S100b* (inner pillar cells), *Hes5* (Deiters' cells), *Kcne1* (marginal cells), *Met* (intermediate cells), *Cldn11* (basal cells), *Slc26a4* (spindle and root cells), *Gm525* (fibrocytes)). Datasets were obtained from the gEAR (<http://umgear.org>) (Kolla et al. 2020; Korrapati et al. 2019; Ranum et al. 2019; Xue et al. 2021).

# MUSC cohort

# TwinsUK cohort

## ATAD3B rs1622213 G>A

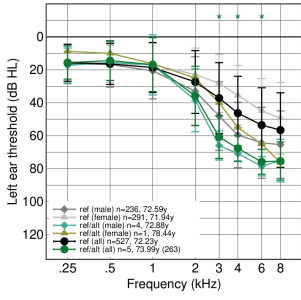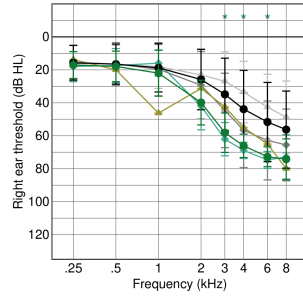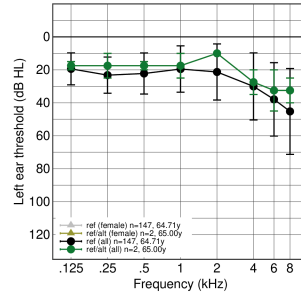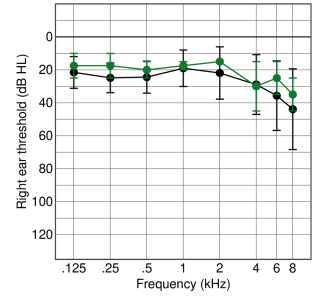

## SYNC rs41265855 G>A

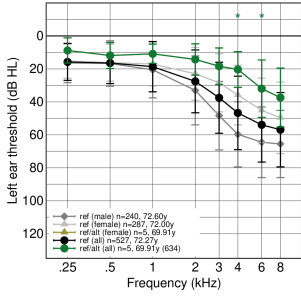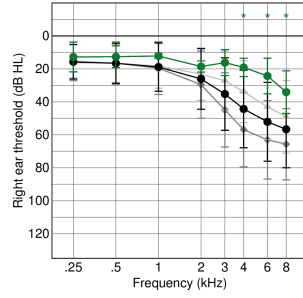

## TCEANC2 rs41294786 C>G

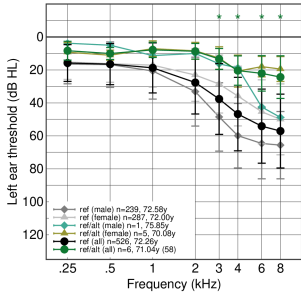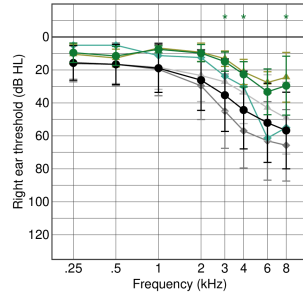

## KIRREL1 rs13995772 C>T

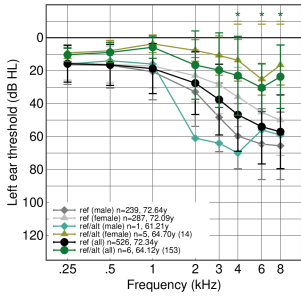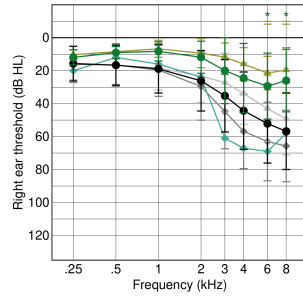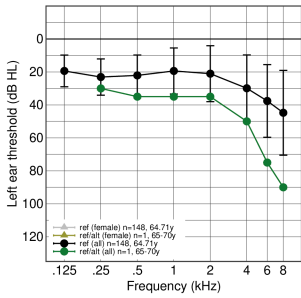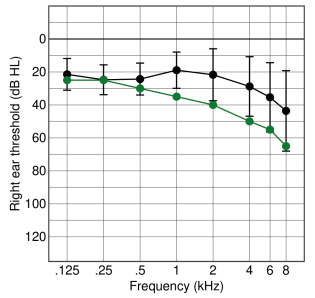

## CAPN9 rs28359655 C>T

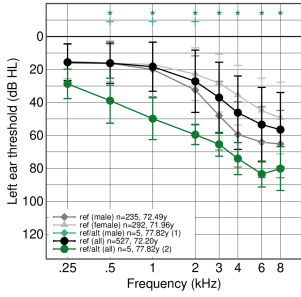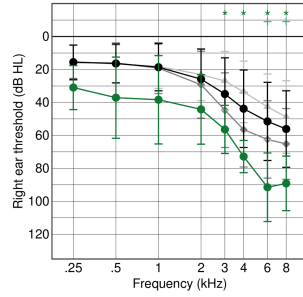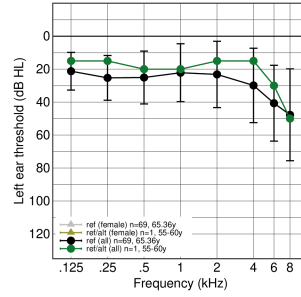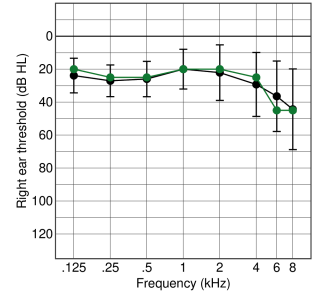

## HS6ST1 . G>T

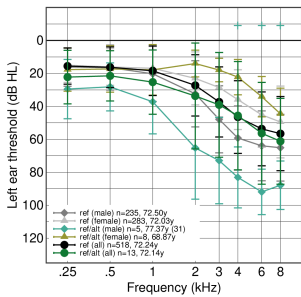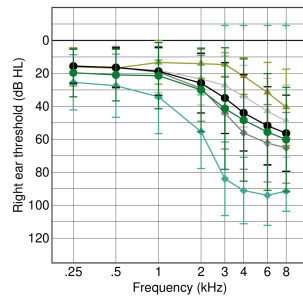

# MUSC cohort

# TwinsUK cohort

## GORASP1 rs575892658 T>A

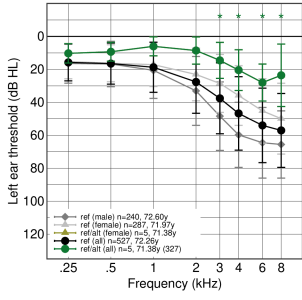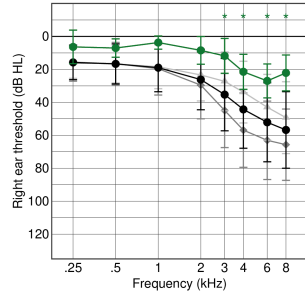

## MED12L rs34501514 G>T

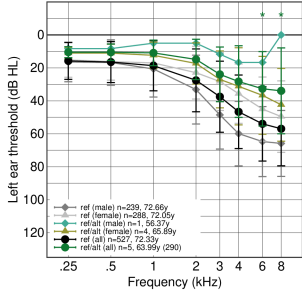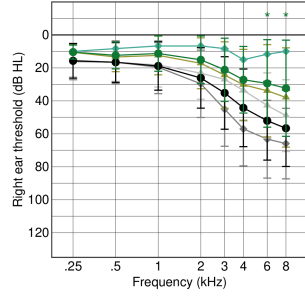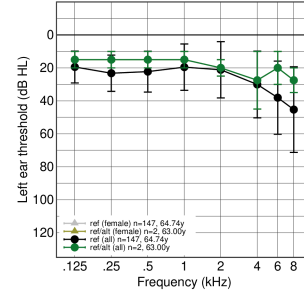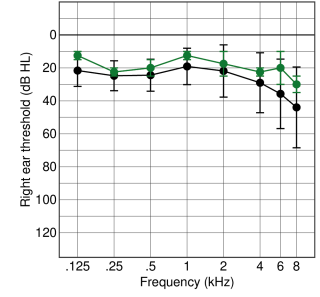

## HADH rs61735992 T>G

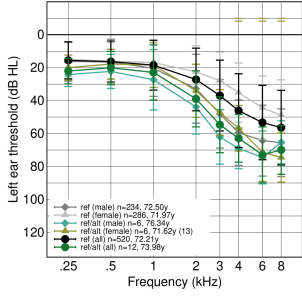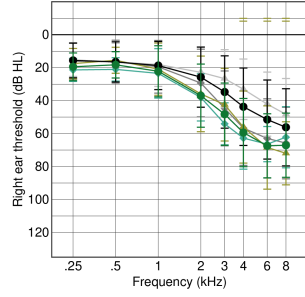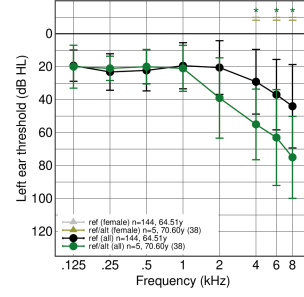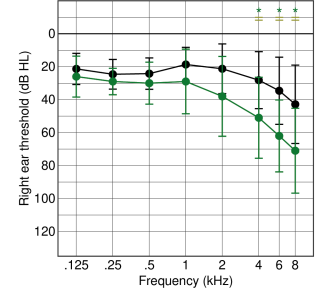

## HTR1B rs130060 A>C

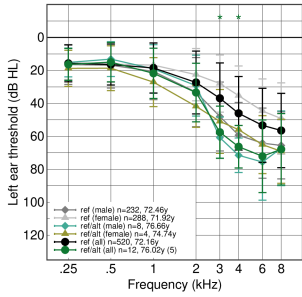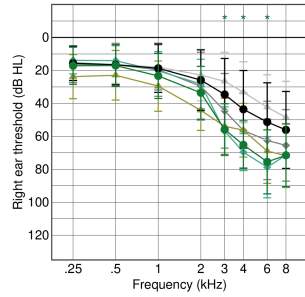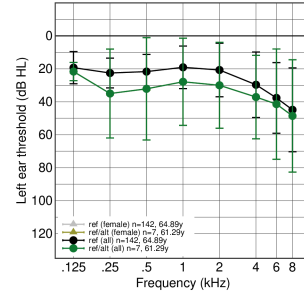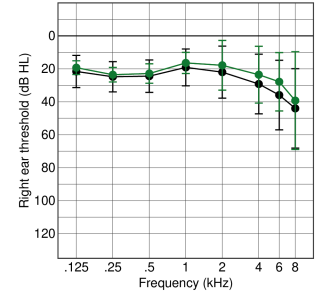

## MPC1 rs550593206 C>A

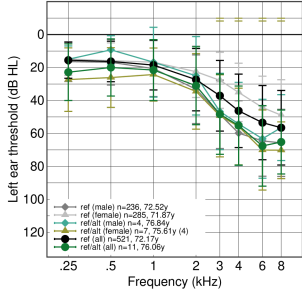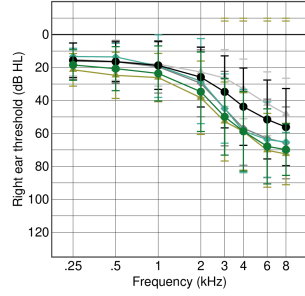

## TMEM184A rs61747419 G>A

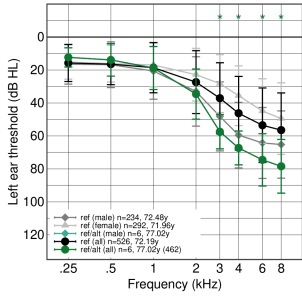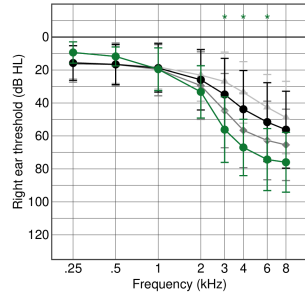



# MUSC cohort

# TwinsUK cohort

### MMS19 rs36023427 C>T

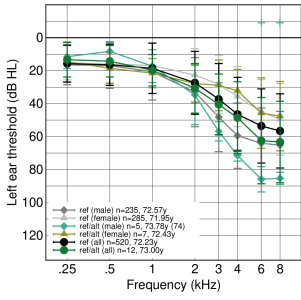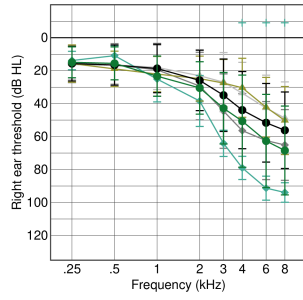

### ZDHHC6 rs34350728 C>T

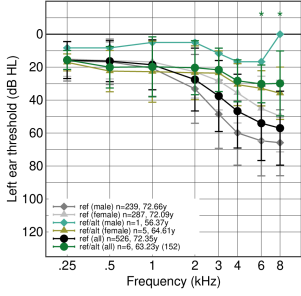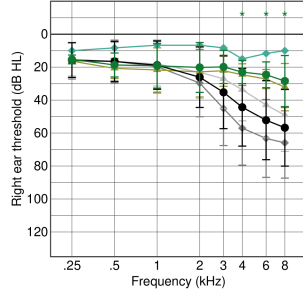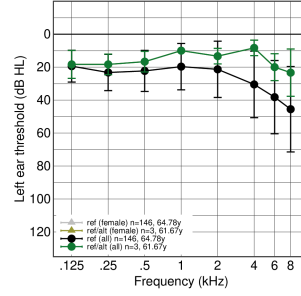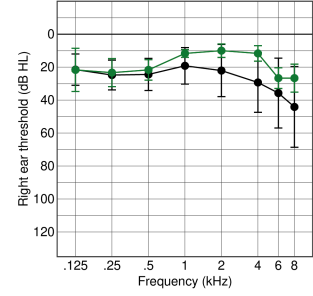

### CFAP46 rs150871636 T>C

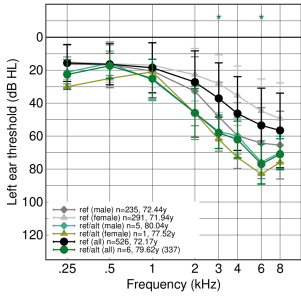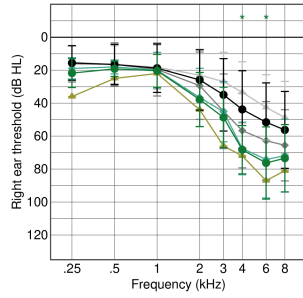

### LRRC4C rs144974170 T>G

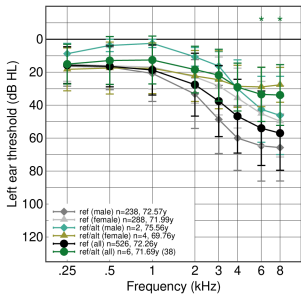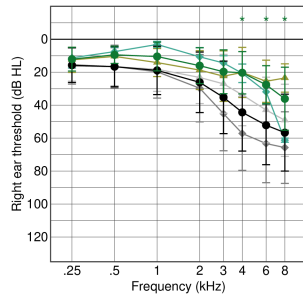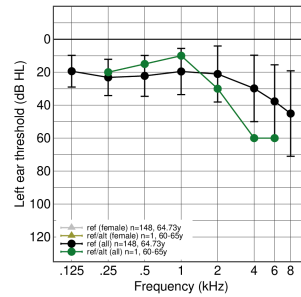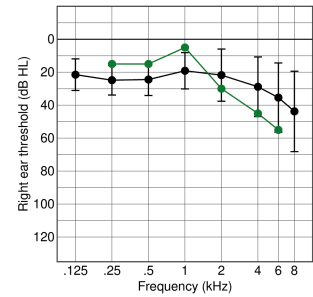

### TNKS1BP1 rs139208640 G>A

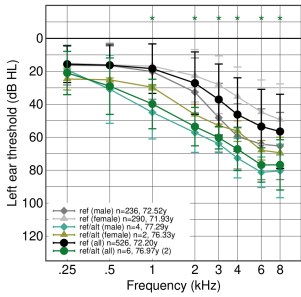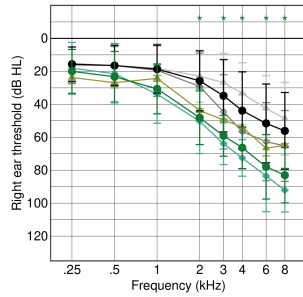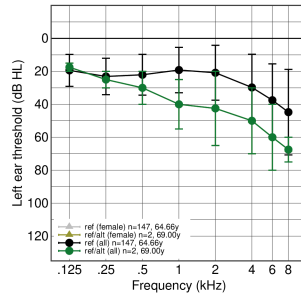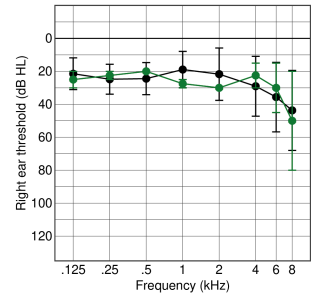

### CLIP1 rs61954403 C>T

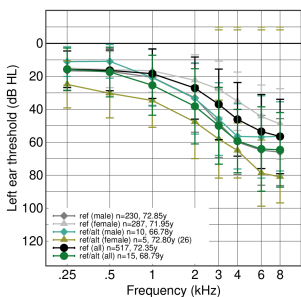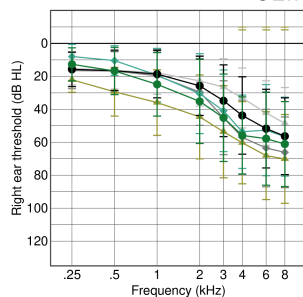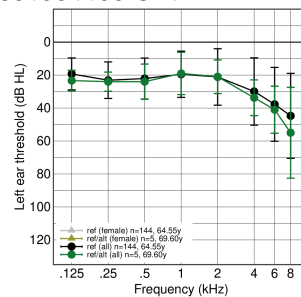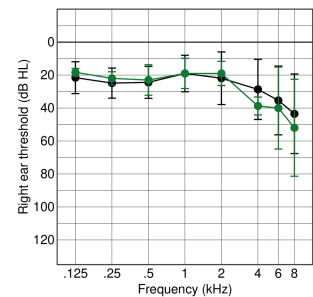

# MUSC cohort

# TwinsUK cohort

**SLC39A2 rs72684072 T>A**

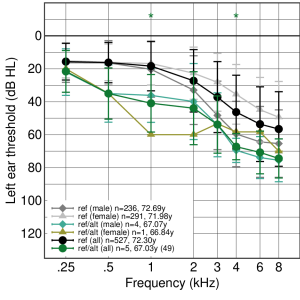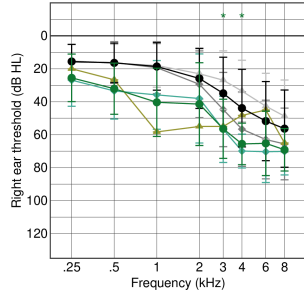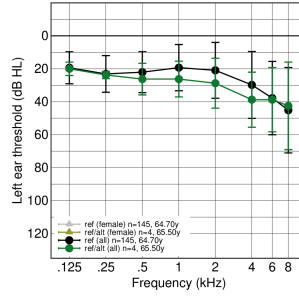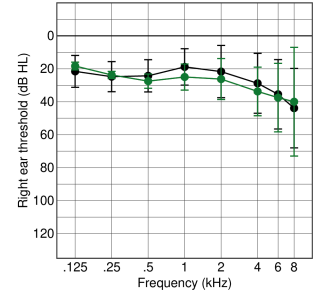

**MIS18BP1 rs34168608 G>C**

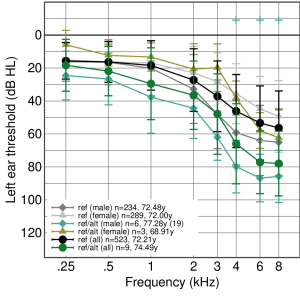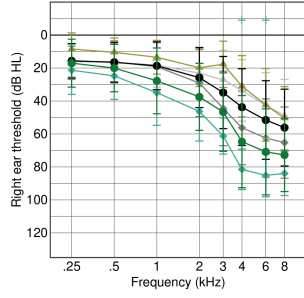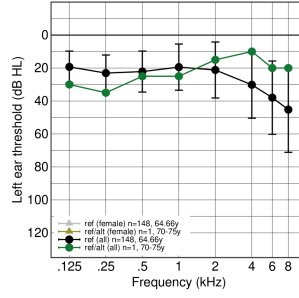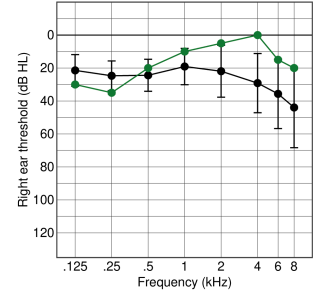

**CGRRF1 rs34839928 C>T**

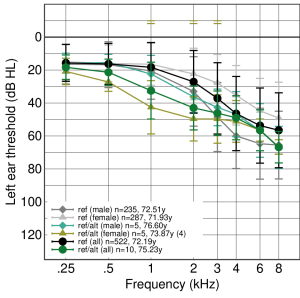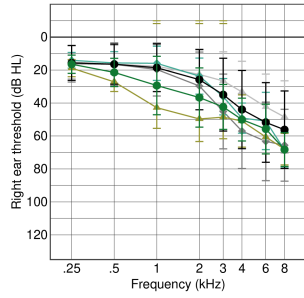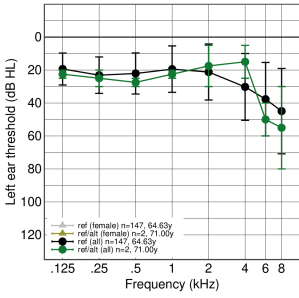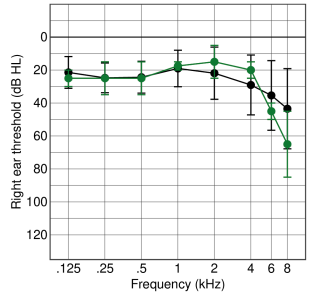

**LRRC9 rs368587449 C>T**

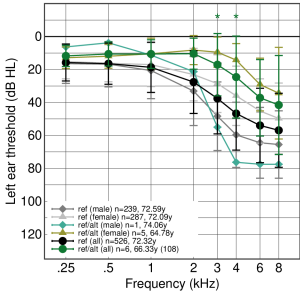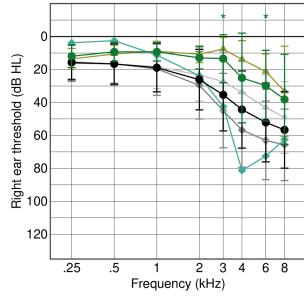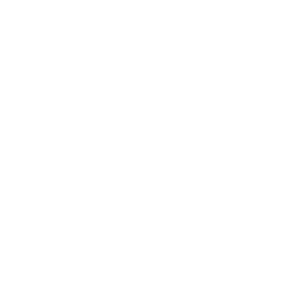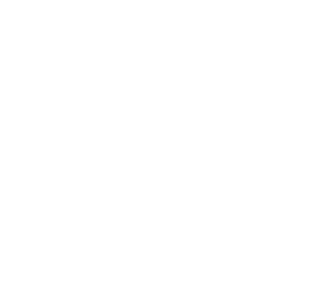

**CASKIN1 rs183093419 T>C**

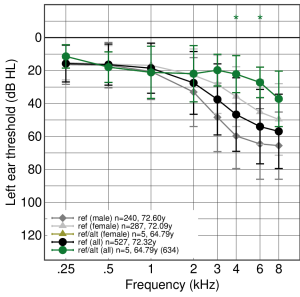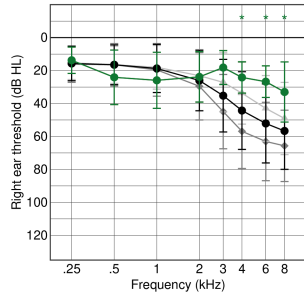

**PDXDC1 rs148061029 G>A**

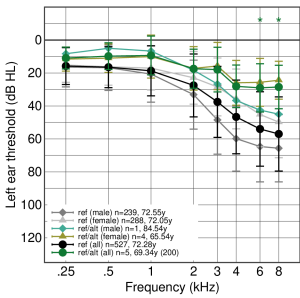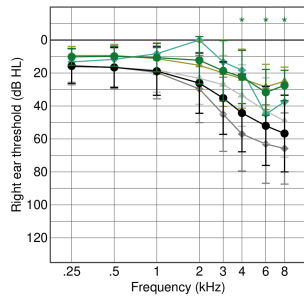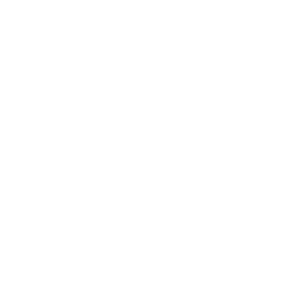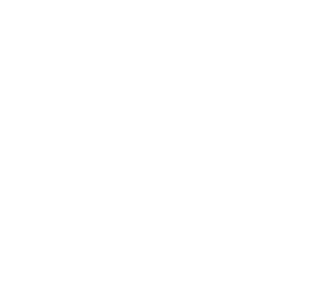









# MUSC cohort

# TwinsUK cohort

**AKR7A3 rs148340817 C>T**

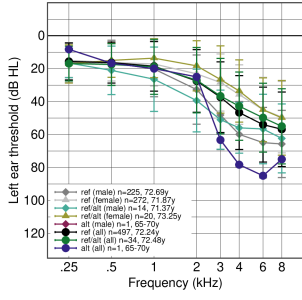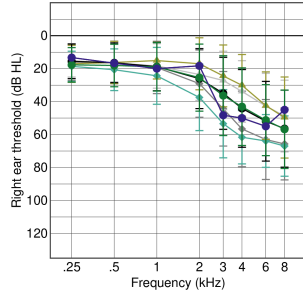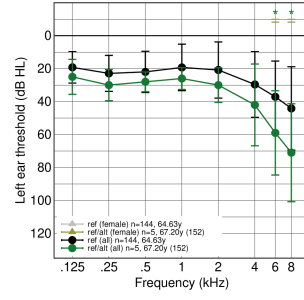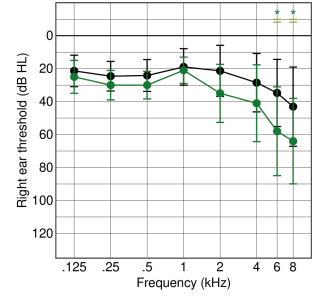

**SCN7A rs6262799 T>C**

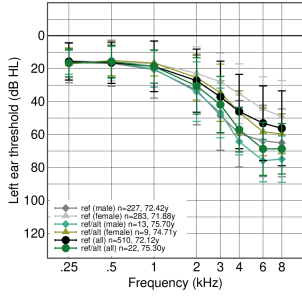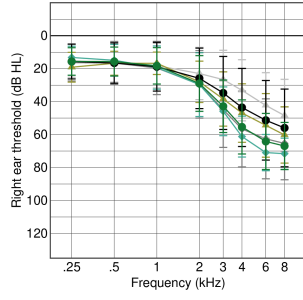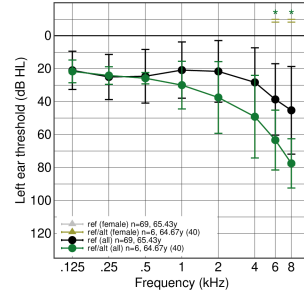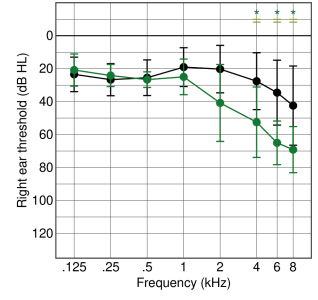

**ME1 rs151111787 T>A**

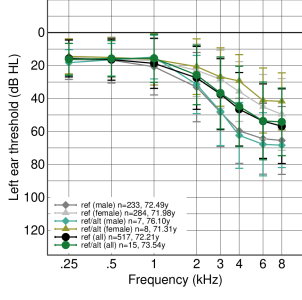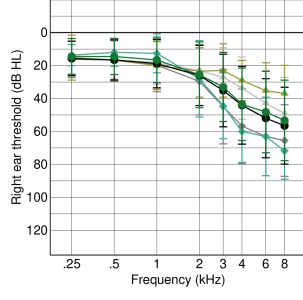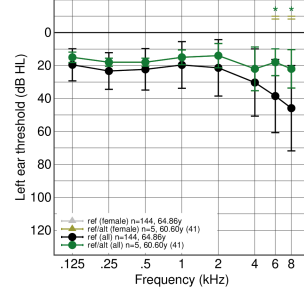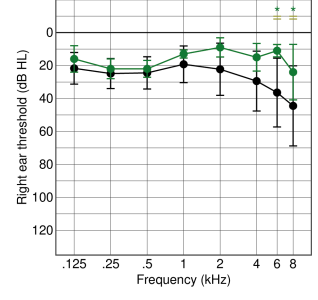

**Suppl. Figure 7.** Audiograms from the MUSC cohort (left pair) and TwinsUK cohort (right pair) showing threshold differences for carriers of the 41 variants identified in the MUSC cohort and the 4 found in the TwinsUK cohort. The corresponding audiogram from the other cohort is shown where there were carriers of that variant. The numbers in brackets in the keys show the number of permutations giving a similar result for that group. Two audiograms are shown for each variant in each cohort; the thresholds from the left ear are shown on the left, and those from the right ear on the right.
